# Supplementary material
Source: PubMed Central journal article supplement (PMC10875489)
Supplement: bmjopen-2022-064374.draft_revisions.pdf [file bmjopen-2022-064374.draft_revisions.pdf]

# BMJ Open

BMJ Open is committed to open peer review. As part of this commitment we make the peer review history of every article we publish publicly available.

When an article is published we post the peer reviewers' comments and the authors' responses online. We also post the versions of the paper that were used during peer review. These are the versions that the peer review comments apply to.

The versions of the paper that follow are the versions that were submitted during the peer review process. They are not the versions of record or the final published versions. They should not be cited or distributed as the published version of this manuscript.

BMJ Open is an open access journal and the full, final, typeset and author-corrected version of record of the manuscript is available on our site with no access controls, subscription charges or pay-per-view fees (<http://bmjopen.bmj.com>).

If you have any questions on BMJ Open's open peer review process please email [info.bmjopen@bmj.com](mailto:info.bmjopen@bmj.com)

# BMJ Open

## Inhaled Ciclesonide in Adults Hospitalized with Covid-19: a Randomized Controlled Open-label Trial (HALT Covid-19)

|                               |                                                                                                                                                                                                                                                                                                                                                                                                                                                                                                                                                                                                                                                                                                                                                                                                                                                                                                                                                                                                                                                                                                                                                                                                                                                                                                                                                                                                                                                                                                                                    |
|-------------------------------|------------------------------------------------------------------------------------------------------------------------------------------------------------------------------------------------------------------------------------------------------------------------------------------------------------------------------------------------------------------------------------------------------------------------------------------------------------------------------------------------------------------------------------------------------------------------------------------------------------------------------------------------------------------------------------------------------------------------------------------------------------------------------------------------------------------------------------------------------------------------------------------------------------------------------------------------------------------------------------------------------------------------------------------------------------------------------------------------------------------------------------------------------------------------------------------------------------------------------------------------------------------------------------------------------------------------------------------------------------------------------------------------------------------------------------------------------------------------------------------------------------------------------------|
| Journal:                      | <i>BMJ Open</i>                                                                                                                                                                                                                                                                                                                                                                                                                                                                                                                                                                                                                                                                                                                                                                                                                                                                                                                                                                                                                                                                                                                                                                                                                                                                                                                                                                                                                                                                                                                    |
| Manuscript ID                 | bmjopen-2022-064374                                                                                                                                                                                                                                                                                                                                                                                                                                                                                                                                                                                                                                                                                                                                                                                                                                                                                                                                                                                                                                                                                                                                                                                                                                                                                                                                                                                                                                                                                                                |
| Article Type:                 | Original research                                                                                                                                                                                                                                                                                                                                                                                                                                                                                                                                                                                                                                                                                                                                                                                                                                                                                                                                                                                                                                                                                                                                                                                                                                                                                                                                                                                                                                                                                                                  |
| Date Submitted by the Author: | 05-May-2022                                                                                                                                                                                                                                                                                                                                                                                                                                                                                                                                                                                                                                                                                                                                                                                                                                                                                                                                                                                                                                                                                                                                                                                                                                                                                                                                                                                                                                                                                                                        |
| Complete List of Authors:     | <p>Brodin, Daniel; Capio Sankt Görans Sjukhus<br/> Tornhammar, Per; Karolinska Institute, Functional Area of Emergency Medicine<br/> Ueda, Peter; Karolinska Institutet<br/> Krifors, Anders; Karolinska Institutet, Department of Physiology and Pharmacology; Västmanlands sjukhus Västerås<br/> Westerlund, Eli; Danderyd University Hospital, Department of Clinical Sciences<br/> Athlin, Simon; Örebro University<br/> Wojt, Sandra; Danderyd University Hospital, Department of Internal Medicine<br/> Elvstam, Olof; Central Hospital Växjö, Department of Infectious Diseases<br/> Neumann, Anca; Capio Sankt Görans Sjukhus<br/> Elshani, Arsim; Karlskoga Hospital<br/> Giesecke, Julia; Karolinska Universitetssjukhuset<br/> Edvardsson-Källkvist, Jens; Karolinska University Hospital<br/> Bunpuckdee, Sayam; Karolinska Institutet<br/> Unge, Christian; Danderyd University Hospital, Department of Internal Medicine<br/> Larsson, Martin; Karolinska Institutet Department of Clinical Science and Education Sodersjukhuset<br/> Johansson, Björn; Halland County<br/> Ljungberg, Johan; Halland County<br/> Lindell, Jonas; Visby Hospital, Department of Infectious Diseases<br/> Hansson, Johan; Östersund Hospital, Department of Infectious Diseases<br/> Blennow, Ola; Karolinska University Hospital, Department of Infectious Diseases<br/> Andersson, Daniel Peter; Karolinska University Hospital, Department of Medicine Huddinge H7, Karolinska Institutet; Karolinska Institute, Medicine (H7)</p> |
| Keywords:                     | COVID-19, Clinical trials < THERAPEUTICS, Respiratory infections < THORACIC MEDICINE                                                                                                                                                                                                                                                                                                                                                                                                                                                                                                                                                                                                                                                                                                                                                                                                                                                                                                                                                                                                                                                                                                                                                                                                                                                                                                                                                                                                                                               |
|                               |                                                                                                                                                                                                                                                                                                                                                                                                                                                                                                                                                                                                                                                                                                                                                                                                                                                                                                                                                                                                                                                                                                                                                                                                                                                                                                                                                                                                                                                                                                                                    |

SCHOLARONE™  
Manuscripts

1  
2  
3  
4  
5  
6  
7  
8  
9  
10  
11  
12  
13  
14  
15  
16  
17  
18  
19  
20  
21  
22  
23  
24  
25  
26  
27  
28  
29  
30  
31  
32  
33  
34  
35  
36  
37  
38  
39  
40  
41  
42  
43  
44  
45  
46  
47  
48  
49  
50  
51  
52  
53  
54  
55  
56  
57  
58  
59  
60

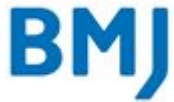

I, the Submitting Author has the right to grant and does grant on behalf of all authors of the Work (as defined in the below author licence), an exclusive licence and/or a non-exclusive licence for contributions from authors who are: i) UK Crown employees; ii) where BMJ has agreed a CC-BY licence shall apply, and/or iii) in accordance with the terms applicable for US Federal Government officers or employees acting as part of their official duties; on a worldwide, perpetual, irrevocable, royalty-free basis to BMJ Publishing Group Ltd ("BMJ") its licensees and where the relevant Journal is co-owned by BMJ to the co-owners of the Journal, to publish the Work in this journal and any other BMJ products and to exploit all rights, as set out in our [licence](#).

The Submitting Author accepts and understands that any supply made under these terms is made by BMJ to the Submitting Author unless you are acting as an employee on behalf of your employer or a postgraduate student of an affiliated institution which is paying any applicable article publishing charge ("APC") for Open Access articles. Where the Submitting Author wishes to make the Work available on an Open Access basis (and intends to pay the relevant APC), the terms of reuse of such Open Access shall be governed by a Creative Commons licence – details of these licences and which [Creative Commons](#) licence will apply to this Work are set out in our licence referred to above.

Other than as permitted in any relevant BMJ Author's Self Archiving Policies, I confirm this Work has not been accepted for publication elsewhere, is not being considered for publication elsewhere and does not duplicate material already published. I confirm all authors consent to publication of this Work and authorise the granting of this licence.

# Inhaled Ciclesonide in Adults Hospitalized with Covid-19: a Randomized Controlled Open-label Trial (HALT Covid-19)

Daniel Brodin<sup>1\*</sup>, MD; Per Tornhammar<sup>2,3\*</sup>, MD; Peter Ueda<sup>4\*\*</sup>, MD, PhD; Anders Krifors<sup>5,6</sup> MD; Eli Westerlund<sup>7</sup>, MD, PhD; Simon Athlin<sup>8</sup>, MD, PhD; Sandra Wojt<sup>9</sup>, MD; Olof Elvstam<sup>10</sup>, MD, PhD; Anca Neumann<sup>1</sup>, MD; Arsim Elshani<sup>11</sup>, MD; Julia Giesecke<sup>3</sup> MD; Jens Edvardsson-Källkvist<sup>3</sup>, MD; Sayam Bunpuckdee<sup>12</sup>, MD student; Christian Unge<sup>9</sup>, MD, PhD; Martin Larsson<sup>13,14</sup>, MD, PhD; Björn Johansson<sup>15</sup>, MD; Johan Ljungberg<sup>15</sup>, MD; Jonas Lindell<sup>16</sup>, MD; Johan Hansson<sup>17</sup>, MD, PhD; Ola Blennow<sup>1,3,18#</sup>, MD, PhD, Daniel P Andersson<sup>3,13#</sup> MD, PhD

\*Equal contributions

#Equal contributions

\*\*Corresponding author

## Correspondence

Ola Blennow MD, PhD Address: Department of Infectious Diseases, Karolinska University Hospital, Huddinge, 14141 Stockholm Sweden

Email: [ola.blennow@regionstockholm.se](mailto:ola.blennow@regionstockholm.se)

Phone: +46739813617

## Affiliations:

<sup>1</sup> Department of Internal Medicine, Capio St Göran's Hospital, Stockholm, Sweden

<sup>2</sup> Functional Area of Emergency Medicine, Karolinska University Hospital Huddinge, Stockholm, Sweden

1  
2  
3 <sup>3</sup> Department of Medicine (H7), Karolinska Institutet, Karolinska University Hospital,  
4  
5 Huddinge, 141 86 Stockholm, Sweden  
6

7 <sup>4</sup> Clinical Epidemiology Division, Department of Medicine Solna, Karolinska Institutet,  
8  
9 Stockholm, Sweden  
10

11 <sup>5</sup> Department of Physiology and Pharmacology, Karolinska Institutet, Stockholm,  
12  
13 Sweden.  
14

15 <sup>6</sup> Centre for Clinical Research Västmanland, Uppsala University, Västmanland  
16  
17 County Hospital, Västerås, Sweden.  
18

19 <sup>7</sup> Department of Clinical Sciences, Karolinska Institutet, Danderyd Hospital,  
20  
21 Stockholm, Sweden  
22

23 <sup>8</sup> School of Medical Sciences, Faculty of Medicine, Örebro University, Örebro,  
24  
25 Sweden  
26

27 <sup>9</sup> Department of Internal Medicine, Danderyd Hospital, Stockholm, Sweden  
28

29 <sup>10</sup> Department of Infectious Diseases, Växjö Central Hospital, Växjö, Sweden  
30

31 <sup>11</sup> Department in Geriatric Medicine at Karlskoga Hospital, Karlskoga, Sweden  
32

33 <sup>12</sup> At the time of the study: Department of Medicine (H7), Karolinska Institutet,  
34  
35 Stockholm, Sweden  
36

37 <sup>13</sup> Department of Endocrinology, Karolinska University Hospital, Stockholm, Sweden  
38

39 <sup>14</sup> Department of Molecular Medicine and Surgery (K1), Karolinska Institutet,  
40  
41 Stockholm, Sweden  
42

43 <sup>15</sup> Department of Infectious Diseases Halland County Hospital Halmstad, Halmstad,  
44  
45 Sweden  
46

47 <sup>16</sup> Department of Infectious Diseases, Visby Hospital, Visby, Sweden  
48

49 <sup>17</sup> Department of Infectious Diseases, Östersund Hospital, Östersund, Sweden  
50  
51  
52  
53  
54  
55  
56  
57  
58  
59  
60

1  
2  
3 <sup>18</sup> Department of Infectious Diseases, Karolinska University Hospital, Stockholm,  
4  
5 Sweden

6  
7  
8 Word count: 3002  
9

10  
11 Abstract word count: 244  
12  
13  
14  
15  
16  
17  
18  
19  
20  
21  
22  
23  
24  
25  
26  
27  
28  
29  
30  
31  
32  
33  
34  
35  
36  
37  
38  
39  
40  
41  
42  
43  
44  
45  
46  
47  
48  
49  
50  
51  
52  
53  
54  
55  
56  
57  
58  
59  
60

For peer review only

## Abstract

**Objective:** To assess the efficacy of ciclesonide in reducing the duration of oxygen therapy (an indicator of time to clinical improvement) among adults hospitalized with Covid-19.

**Design:** Multicenter, randomized, controlled, open-label trial.

**Setting:** 9 hospitals (3 academic hospitals and 6 non-academic hospitals) in Sweden between June 1, 2020, and May 17, 2021.

**Participants:** Adults hospitalized with Covid-19 and receiving oxygen therapy.

**Intervention:** Ciclesonide 320 µg twice daily for 14 days versus standard care.

**Main outcome measures:** Primary outcome was duration of oxygen therapy, an indicator of time to clinical improvement. Key secondary outcome was a composite of invasive mechanical ventilation/death.

**Results:** Data from 98 participants were analyzed (48 receiving ciclesonide and 50 receiving standard care; median (IQR) age, 59.5 (49-67) years; 67 (68%) male). Median (IQR) duration of oxygen therapy was 5.5 (3-9) days in the ciclesonide group and 4 (2-7) days in the standard care group (hazard ratio (HR) for termination of oxygen therapy 0.73 (95% CI 0.47-1.11), with the upper 95% CI being compatible with a 10% relative reduction in oxygen therapy duration, corresponding to a <1-day absolute reduction). Three participants in each group died/received invasive mechanical ventilation (HR 0.90 (95% CI 0.15-5.32)). The trial was discontinued early due to slow enrollment.



1  
2  
3 **Conclusions:** In hospitalized Covid-19 patients receiving oxygen therapy, this trial  
4 ruled out, with 0.95 confidence, a treatment effect of ciclesonide corresponding to  
5 more than a one-day reduction in duration of oxygen therapy. Ciclesonide is unlikely  
6 to improve this outcome meaningfully.  
7  
8  
9  
10  
11  
12  
13  
14  
15

### 16 **Strengths and limitations of this study**

- 17 • This was a multicenter, randomized, controlled, open-label trial comparing  
18 treatment with the inhaled corticosteroid ciclesonide 320 µg twice daily for 14  
19 days versus standard care.  
20
- 21 • While inhaled corticosteroids have been assessed among non-hospitalized  
22 patients with Covid-19, data from studies on hospitalized Covid-19 patients  
23 with more severe disease are scarce.  
24
- 25 • The trial was terminated early due to slow recruitment. Healthcare providers  
26 and participants were not blinded to treatment assignment.  
27  
28  
29  
30  
31  
32  
33  
34  
35  
36  
37  
38  
39  
40  
41  
42  
43  
44  
45  
46  
47  
48  
49  
50  
51  
52  
53  
54  
55  
56  
57  
58  
59  
60

## Introduction

Patients with Covid-19 can develop acute respiratory failure that may require invasive mechanical ventilation, associated with high mortality. The unregulated inflammation in the lungs, poor oxygenation and pulmonary infiltrates characterizing severe Covid-19 have been considered as a type of acute respiratory distress syndrome (ARDS).[1, 2]

Prior to the Covid-19 pandemic, studies have indicated that inhaled corticosteroids may reduce the risk of ARDS. In a randomized controlled trial including 61 patients at risk of ARDS, none of the patients assigned to aerosolized budesonide/formoterol vs 7 assigned to placebo developed ARDS,[3] and 6 (20%) and 16 (53%) of the patients, respectively, received mechanical ventilation. In another trial including 60 patients with acute lung injury or ARDS, nebulized budesonide improved oxygenation and peak and plateau airway pressures, and reduced inflammatory markers.[4] Moreover, potentially protective and preventive effects of inhaled corticosteroids for ARDS is supported by animals models of lung injury,[5-8] and *in vitro* studies.[9]

Therefore, it could be hypothesized that inhaled corticosteroids may be beneficial for patients with severe Covid-19. The hypothesis is further supported by reports that inhaled corticosteroids reduce the epithelial expression of genes linked to SARS-CoV-2 entry into host cells.[10, 11] Among the inhaled corticosteroids, ciclesonide has been identified as a particularly promising treatment as it can suppress replication of SARS-CoV-2 *in vitro*. [12, 13]

While previous randomized controlled trials have assessed the effects of inhaled budesonide[14, 15] or ciclesonide[16, 17] in non-hospitalized Covid-19 patients, no study has been performed in hospitalized patients with more severe Covid-19.

1  
2  
3 This open-label randomized controlled trial investigated the effects of inhaled  
4  
5 ciclesonide, compared to standard care, in adult patients hospitalized with Covid-19  
6  
7 and requiring oxygen therapy.  
8  
9

## 10 11 12 13 **Methods**

### 14 15 16 *Study design*

17  
18  
19  
20  
21 The HALT Covid-19 (inHALation of ciclesonide for Treatment of Covid-19) trial was a  
22  
23 multicenter, open-label randomized controlled trial to assess the efficacy and safety  
24  
25 of inhaled ciclesonide for the treatment of hospitalized patients with Covid-19  
26  
27 receiving oxygen therapy. The trial was conducted at 9 hospitals (3 academic  
28  
29 hospitals and 6 non-academic hospitals) in Sweden between June 1, 2020, and May  
30  
31 17, 2021.  
32  
33

34  
35  
36  
37 All participants provided written informed consent. The study was approved by the  
38  
39 Swedish Ethical Review Authority (Ethics committee number 2020-02183) and the  
40  
41 Swedish Medical Products Agency (Eudra-CT number 2020-001928-34) and  
42  
43 registered at [clinicaltrials.gov](https://clinicaltrials.gov) (NCT04381364).  
44  
45

### 46 47 48 *Protocol changes and rationale*

49  
50  
51  
52  
53 The trial was designed in the beginning of the Covid-19 pandemic. After trial initiation,  
54  
55 treatments for, and hospitalization rates of, patients with Covid-19 changed rapidly.  
56  
57 Therefore, we made protocol changes (described in detail in the Online Appendix)  
58  
59 and the trial was stopped early.  
60

1  
2  
3  
4  
5 In brief, we increased the number of study centers, removed the upper age limit ( $\leq 85$   
6 years) for patient inclusion, changed the inclusion criteria from  $\leq 48$  hours since  
7 hospital admission to  $\leq 48$  hours from initiation of oxygen therapy and allowed for  
8 patients to be included on the basis of a positive antigen test for SARS-Cov-2. All  
9 changes were approved by the Data Monitoring Committee, Ethical Review Authority  
10 and the Swedish Medical Products Agency and implemented from December 2020.  
11  
12  
13  
14  
15  
16  
17  
18  
19  
20

21 In June 2021, 99 patients had been included in the study, a large and increasing  
22 proportion of the adult Swedish population had received Covid-19 vaccination and  
23 hospitalizations for Covid-19 had dropped substantially. We determined that it was  
24 unlikely that the intended sample size would be reached and asked the Data  
25 Monitoring Committee to convene for a meeting. Following the recommendation of  
26 the Data Monitoring Committee, the study was terminated for futility to meet the  
27 targeted enrolment.  
28  
29  
30  
31  
32  
33  
34  
35  
36  
37  
38  
39  
40

### 41 *Participants*

42  
43  
44 Based on observations from Covid-19 patients treated at the study centers, we  
45 expected that 85% of the standard care group would survive and terminate oxygen  
46 therapy within 30 days (median 8 days). We considered a 25% (2 days) reduction in  
47 the duration of oxygen therapy to be a clinically meaningful effect. We estimated that  
48 such an effect could be detected with  $\alpha$  of 0.05, and 80% power if 446 participants  
49 (223 in each group) were enrolled.  
50  
51  
52  
53  
54  
55  
56  
57  
58  
59  
60

1  
2  
3 Participants were eligible for inclusion if, they (1) were aged  $\geq 18$  years, (2) had a  
4  
5 polymerase chain reaction confirmed SARS-CoV-2 infection or a positive SARS-CoV-  
6  
7 2 antigen test from the upper respiratory tract, (3) were hospitalized at any of the  
8  
9 study hospitals and (4) were receiving oxygen therapy, initiated within 48 hours  
10  
11 before inclusion. Key exclusion criteria were ongoing treatment with inhaled or oral  
12  
13 corticosteroids, oxygen therapy with  $>8$  L oxygen/min or  $>50$  % oxygen on nasal  
14  
15 high-flow cannula, and ongoing or expected intensive care or palliative care (Online  
16  
17 Appendix).

### 21 22 23 *Randomization*

24  
25 Patients were randomized 1:1 in blocks of 8, stratified by sex and hospital to receive  
26  
27 ciclesonide or standard care. The randomization sequence was prepared by a  
28  
29 statistician not involved in the trial. Treatment allocation was provided through a web-  
30  
31 based interface. The participants and the physicians treating them were unblinded to  
32  
33 the treatment assignment.

### 34 35 36 37 38 39 *Intervention*

40  
41  
42 The treatment was 320  $\mu\text{g}$  of inhaled ciclesonide (80  $\mu\text{g}$  per actuation, for a total of 4  
43  
44 actuations, or 160  $\mu\text{g}$  per actuation, for a total of 2 actuations) twice daily (total daily  
45  
46 dose 640  $\mu\text{g}$ ) for 14 days. Ciclesonide was administered using a spacer (L'espace,  
47  
48 Nordic Infucare, Stockholm Sweden). Participants randomized to ciclesonide  
49  
50 received written instructions, including pictures, and practical instructions on how to  
51  
52 use the inhalator and spacer; the first dose was taken under supervision. Ciclesonide  
53  
54 was then prescribed in the participant's electronic medical record and each given  
55  
56 dose during the hospitalization was recorded. Participants discharged before day 14  
57  
58  
59  
60

1  
2  
3 were instructed to continue the treatment at home for a total treatment duration of 14  
4  
5 days. Participants randomized to standard care did not receive any intervention  
6  
7 related to the study. Physicians treating the participants were not given any  
8  
9 restrictions concerning treatments during the study period. Participants who had been  
10  
11 discharged were contacted by telephone after day 30 for a follow-up interview.  
12  
13  
14  
15  
16

### 17 *Outcomes*

18  
19  
20  
21 The primary outcome was duration of oxygen therapy (time to termination of oxygen  
22  
23 therapy in days) up to 30 days from randomization. Oxygen therapy was defined as  
24  
25 terminated on the day after which the patient did not receive oxygen therapy during  
26  
27 at least 48 hours, while being alive. This outcome corresponded to clinical  
28  
29 improvement for patients receiving oxygen therapy according to the World Health  
30  
31 Organization clinical progression scale.[18]  
32  
33  
34  
35  
36

37 The key secondary outcome was a composite of invasive mechanical ventilation and  
38  
39 death up to 30 days after randomization. Other secondary outcomes were each  
40  
41 component of the key secondary outcome, admission to an intensive care unit,  
42  
43 discharge from the hospital and dyspnea in daily living at 30-35 days after  
44  
45 randomization as evaluated by the mMRC (Modified Medical Research Council)  
46  
47 dyspnea scale. The scale ranges from 0 to 4 with a higher score indicating more  
48  
49 severe dyspnea.[19, 20]  
50  
51  
52  
53  
54

55 Data on serious adverse events[21] were collected by review of electronic medical  
56  
57 records. Information about non-serious adverse events associated with ciclesonide  
58  
59 use (dryness of mouth, nausea and oral candidiasis) was reported using a paper-  
60

1  
2  
3 based reporting form which was filled in by the treating physician. Information about  
4 non-serious adverse events occurring after hospital discharge was collected during  
5 the follow-up interview.  
6  
7  
8  
9

### 10 11 12 *Data collection* 13

14  
15  
16 Patient characteristics at baseline (comorbidities, comedications, clinical parameters)  
17 and study outcomes were obtained from electronic medical records. Investigators  
18 contacted participants after day 30 after randomization to ask them about non-  
19 serious adverse events and dyspnea in daily living (study outcome) at day 30-35 after  
20 randomization.  
21  
22  
23  
24  
25  
26  
27  
28  
29

### 30 31 *Statistical analysis* 32

33  
34 According to the pre-specified analysis plan in the study protocol, the analyses were  
35 performed by an investigator who had not been involved in the enrolment of  
36 participants and was blinded to treatment assignment. An intention-to-treat  
37 population was used. In the analysis of the duration of oxygen therapy, participants  
38 were followed from randomization to termination of oxygen therapy, death, or 30 days  
39 after randomization. Kaplan Meier cumulative incidence curves were generated to  
40 illustrate the cumulative incidence of termination of oxygen therapy in the ciclesonide  
41 and standard care groups. A Cox proportional hazard regression model, adjusted for  
42 study hospital (Appendix Table 1), age (continuous variable) and sex was used to  
43 estimate hazard ratios (HR) with 95% CI for time-to-event outcomes. Proportions and  
44 the absolute risk difference with 95% CI were presented for binary outcomes.  
45  
46  
47  
48  
49  
50  
51  
52  
53  
54  
55  
56  
57  
58  
59  
60 Subgroup analyses were performed for the primary outcome by sex, age (<70 years

1  
2  
3 and  $\geq 70$  years) and duration of Covid-19 symptoms ( $< 10$  days and  $\geq 10$  days). In a  
4  
5 per-protocol analysis of the primary outcome, participants assigned to ciclesonide  
6  
7 were censored at the time of discontinuing treatment. The median mMRC score was  
8  
9 compared using the Kruskal-Wallis test. A logistic regression model adjusted for  
10  
11 study hospital, age and sex was used to compare the likelihood of reporting a mMRC  
12  
13 score of 0 (dyspnea only with strenuous exercise).  
14  
15

16  
17  
18  
19  
20 95% CIs of ratios not including 1 and 95% CIs for absolute risk differences not  
21  
22 including 0 were considered statistically significant. Secondary outcome analyses  
23  
24 and subgroup analyses were considered hypothesis-generating and no adjustment  
25  
26 for multiple testing was made. Analyses were performed using Stata version 16.1  
27  
28 (StataCorp).  
29  
30  
31  
32  
33  
34  
35

### 36 *Patient and Public involvement*

37  
38 No patients were involved in setting the research question, nor in the design,  
39  
40 conduct, or interpretation of the study.  
41  
42  
43  
44  
45  
46  
47  
48  
49

### 50 **Results**

51  
52 Of the 99 participants who underwent randomization 48 were assigned to receive  
53  
54 ciclesonide and 51 to standard care (Figure 1). One participant in the standard care  
55  
56 group withdrew consent and was excluded from the analysis. Ninety-eight patients  
57  
58 (48 in the ciclesonide group and 50 in the standard care group) were included in the  
59  
60



final analysis. All participants assigned to ciclesonide received the treatment at least once. None of the participants were lost to follow-up. The median age of participants was 59.5 (IQR 49, 67) years, 68% were men and the median duration of symptoms was 9 (IQR 8, 11) days. There were no relevant between-group differences in demographic characteristics, laboratory test results or comorbidities at enrollment (Table 1).

**Table 1** Demographic and clinical characteristics of participants at study enrolment.

|                                                      | <b>Total (n=98)</b> | <b>Ciclesonide (n=48)</b> | <b>Standard care (n=50)</b> |
|------------------------------------------------------|---------------------|---------------------------|-----------------------------|
| Age, median (IQR)                                    | 59.5 (49, 67)       | 61 (49, 67)               | 59 (49, 67)                 |
| Men, n (%)                                           | 67 (68)             | 34 (71)                   | 33 (66)                     |
| Days since symptom onset, median (IQR)               | 9 (8, 11)           | 9 (7.5, 11.5)             | 10 (8, 11)                  |
| Body mass index in kg/m <sup>2</sup> , median (IQR)  | 29.7 (25.6, 34.0)   | 28.7 (25.4, 34.0)         | 30.6 (26.8, 34.3)           |
| Oxygen flow of oxygen therapy in L/min, median (IQR) | 2 (1, 3)            | 2 (1, 3)                  | 2 (1, 2)                    |
| Respiratory rate per minute, median (IQR)            | 20 (18, 24)         | 20 (19, 25)               | 20 (18, 23)                 |
| C-reactive protein in mg/L, median (IQR)             | 100 (56, 142)       | 103 (62, 164)             | 91.5 (45.5, 124.5)          |
| White cell count in x 10 <sup>9</sup> /L, median IQR | 5.7 (4.5, 7.0)      | 5.3 (4.3, 6.9)            | 6.1 (4.9, 7.0)              |
| eGFR in mL/min/1.73m <sup>2</sup> , median (IQR)     | 83 (70.5, 90)       | 81.5 (70, 90)             | 87 (73, 90)                 |
| <b>Coexisting conditions, n (%)</b>                  |                     |                           |                             |
| Diabetes mellitus                                    | 18 (18)             | 8 (17)                    | 10 (20)                     |
| Hypertension <sup>a</sup>                            | 45 (46)             | 22 (46)                   | 23 (46)                     |
| Hyperlipidemia <sup>b</sup>                          | 27 (28)             | 12 (25)                   | 15 (30)                     |
| Chronic obstructive lung disease                     | 3 (3)               | 1 (2)                     | 2 (4)                       |
| Asthma                                               | 8 (8)               | 6 (13)                    | 2 (4)                       |
| Current smoker                                       | 12 (12)             | 6 (13)                    | 6 (12)                      |
| Ischemic heart disease                               | 8 (8)               | 2 (4)                     | 6 (12)                      |
| Heart failure                                        | 3 (3)               | 2 (4)                     | 1 (2)                       |
| Atrial fibrillation                                  | 5 (5)               | 3 (6)                     | 2 (4)                       |

|                        |         |        |        |
|------------------------|---------|--------|--------|
| Cancer                 | 10 (10) | 5 (10) | 5 (10) |
| Chronic kidney disease | 9 (9)   | 5 (10) | 4 (8)  |

<sup>a</sup> Diagnosis of hypertension or use of antihypertensive drugs

<sup>b</sup> Diagnosis of hyperlipidemia or use of lipid lowering therapy

Missing values were: n=1 for days since symptom onset, n=20 for body mass index, n=1 for oxygen flow of oxygen therapy, n=1 for body temperature, n=1 for heart rate, n=3 for respiratory rate, n=3 for C-reactive protein, n=7 for white cell count and n=22 for eGFR.

eGFR: estimated glomerular filtration rate

The results of primary and secondary outcome analyses are presented in Table 2.

Kaplan-Meier estimates of the median duration of oxygen therapy were 5.5 (IQR 3, 9) days in the ciclesonide group and 4 (2, 7) days in the standard care group. (Figure 2).

The HR for termination of oxygen therapy used to compare ciclesonide vs standard care showed that ciclesonide treatment was not statistically significantly associated with the duration of oxygen therapy (0.73 (95% CI 0.47 to 1.11)). The upper limit of the 95% CI was compatible with a maximum relative reduction<sup>[22]</sup> in duration of oxygen therapy of 10% (1-1/1.11) with ciclesonide, corresponding to a <1 day absolute reduction. In the per-protocol analysis, the HR for termination of oxygen therapy was 0.79 (95% CI 0.51 to 1.23) (Table 2).

**Table 2** Outcomes.

|                                                 | Ciclesonide | Standard care | Difference <sup>a</sup> |
|-------------------------------------------------|-------------|---------------|-------------------------|
| <b>Primary outcome</b>                          |             |               |                         |
| Duration of oxygen therapy, median (IQR) days   | 5.5 (3, 9)  | 4 (2, 7)      | 0.73 (0.47 to 1.11)     |
| <b>Key secondary outcome</b>                    |             |               |                         |
| Death or invasive mechanical ventilation, n (%) | 3 (6)       | 3 (6)         | 0 (-9 to 10)            |

|                                                                     |            |          |                     |
|---------------------------------------------------------------------|------------|----------|---------------------|
| Time to death or invasive mechanical ventilation, median (IQR) days | 2 (2, 10)  | 4 (2, 7) | 0.90 (0.15 to 5.32) |
| <b>Secondary outcomes</b>                                           |            |          |                     |
| Death, n (%)                                                        | 2 (4)      | 1 (2)    | -                   |
| Invasive mechanical ventilation, n (%)                              | 1 (2)      | 3 (6)    | -                   |
| Admission to an intensive care unit, n (%)                          | 4 (8)      | 4 (8)    | -                   |
| mMRC dyspnea scale score at day 30-35, median (IQR) <sup>b</sup>    | 3 (2, 4)   | 3 (2, 4) | 0.97                |
| mMRC dyspnea scale score 0 at day 30-35, n (%) <sup>b</sup>         | 4 (9)      | 7 (15)   | 0.48 (0.11 to 2.04) |
| <b>Subgroup analyses<sup>c</sup></b>                                |            |          |                     |
| <i>Sex: Men</i>                                                     |            |          |                     |
| Duration of oxygen therapy, median (IQR) days                       | 5.5 (3, 9) | 5 (2, 7) | 0.61 (0.36 to 1.05) |
| <i>Sex: Women</i>                                                   |            |          |                     |
| Duration of oxygen therapy, median (IQR) days                       | 5.5 (2, 7) | 4 (2, 8) | 0.91 (0.41 to 2.01) |
| <i>Age group: &lt;70 years</i>                                      |            |          |                     |
| Duration of oxygen therapy, median (IQR) days                       | 5 (3, 7)   | 4 (2, 7) | 0.77 (0.48 to 1.23) |
| <i>Age group: ≥70 years</i>                                         |            |          |                     |
| Duration of oxygen therapy, median (IQR) days                       | 9 (5, 10)  | 6 (5, 8) | 0.37 (0.08 to 1.78) |
| <i>Days since symptom onset: &lt;10 days</i>                        |            |          |                     |
| Duration of oxygen therapy, median (IQR) days                       | 7 (3, 10)  | 4 (2, 5) | 0.54 (0.28 to 1.03) |
| <i>Days since symptom onset: ≥10 days</i>                           |            |          |                     |
| Duration of oxygen therapy, median (IQR) days                       | 5 (3, 6)   | 5 (3, 8) | 0.97 (0.48 to 1.94) |
| <b>Per protocol analysis<sup>d</sup></b>                            |            |          |                     |
| Duration of oxygen therapy, median (IQR) days                       | 5 (3, 9)   | 4 (2, 7) | 0.79 (0.51 to 1.23) |

<sup>a</sup>. Differences are expressed as hazard ratios (95% CI) estimated using a Cox proportional hazards model for time to event outcomes and as absolute risk difference (95% CI) in percent for outcomes of absolute risk. The comparison of the mMRC dyspnea score was done using the Kruskal-Wallis test and the difference is expressed as a p-value. The comparison of the likelihood of reporting a mMRC score of 0 was done using a logistic regression model and the difference is expressed as an odds ratio (95% CI). Statistical testing for differences in proportions and time-to-event analyses were not performed for the secondary outcome events, including death, invasive mechanical ventilation, and admission to an intensive care unit due to few events.

1  
2  
3 <sup>b</sup>. Not including 1 participant in the standard care group and 2 participants in the ciclesonide group who died within  
4 30 days of randomization and 1 participant in the standard care group and 1 participant in the ciclesonide group with  
5 missing data on this outcome.  
6  
7

8  
9 <sup>c</sup>. The subgroup analyses included n=33 in the standard care group and n=34 in the ciclesonide group for men, n=17 in  
10 the standard care group and n=14 in the ciclesonide group for women, n=41 in the standard care group and n=37 in  
11 the ciclesonide group for those aged <70 years, n=9 in the standard care group and n=11 in the ciclesonide group for  
12 those aged ≥70 years, n=24 in the standard care group and n=27 in the ciclesonide group for those with <10 days  
13 since symptom onset, and n=25 in the standard care group and n=21 in the ciclesonide group for those with ≥10 days  
14 since symptom onset. 1 participant had missing data on days since symptom onset and was not included in the  
15 subgroup analysis.  
16  
17  
18  
19  
20  
21

22 <sup>d</sup>. In the per-protocol analysis for duration of oxygen therapy, patients assigned to ciclesonide were censored at the  
23 time of discontinuing treatment.  
24  
25  
26  
27  
28

29 In total, 3 (6%) participants assigned to ciclesonide and 3 (6%) participants assigned  
30 to standard care experienced the key secondary outcome of mechanical invasive  
31 ventilation or death (absolute difference 0% (95% CI -10 to 9%; HR 0.90 (95% CI  
32 0.15 to 5.32)). Median mMRC dyspnea score at 30-35 days after randomization was  
33 3 (IQR 2, 4) in both groups (p-value for difference 0.97) (Table 2).  
34  
35  
36  
37  
38  
39  
40  
41  
42

43 There were no statistically significant differences between those assigned to  
44 ciclesonide vs standard care in the primary outcome in any of the subgroup analyses  
45 by sex, age (<70 years and ≥70 years) and days since symptom onset (<10 days and  
46 ≥10 days) (Table 2).  
47  
48  
49  
50  
51  
52  
53  
54  
55

56 There were no apparent differences between the groups in treatments that  
57 participants received after randomization (Table 3); 26 (54%) of the participants  
58  
59  
60

1  
2  
3 assigned to ciclesonide and 22 (44%) of the participants in the standard care group  
4  
5 received treatment with systemic corticosteroids after randomization.  
6  
7  
8  
9

10  
11 Few serious adverse clinical events occurred during the study. The most frequently  
12 reported adverse event was dry mouth (7 (15%) participants in the ciclesonide group  
13 and 11 (22%) participants in the standard care group). Two participants assigned to  
14 ciclesonide and 0 in the placebo group reported that they experienced oral  
15 candidiasis (Table 3).  
16  
17  
18  
19  
20  
21  
22  
23  
24  
25

26 **Table 3** Participants' treatments and adverse clinical events through day 30 after  
27 randomization.  
28  
29  
30  
31

|                                       | <b>Ciclesonide</b><br>(n=48) | <b>Standard care</b><br>(n=50) |
|---------------------------------------|------------------------------|--------------------------------|
| <b>Received treatment, n (%)</b>      |                              |                                |
| Systemic corticosteroids              | 26 (54)                      | 22 (44)                        |
| Remdesivir                            | 4 (8)                        | 5 (10)                         |
| Low-molecular-weight heparin          | 45 (94)                      | 45 (90)                        |
| Oral anticoagulants                   | 32 (67)                      | 30 (60)                        |
| Vasopressors                          | 4 (8)                        | 3 (6)                          |
| Non-invasive mechanical ventilation   | 8 (17)                       | 7 (14)                         |
| <b>Serious clinical events, n (%)</b> |                              |                                |
| Renal failure                         | 2 (4)                        | 3 (6)                          |
| Cardiac arrest                        | 1 (2)                        | 0 (0)                          |
| New onset atrial fibrillation         | 0 (0)                        | 1 (2)                          |
| Pulmonary embolism                    | 4 (8)                        | 2 (4)                          |
| Other thromboembolic events           | 0 (0)                        | 1 (2)                          |

|                                          |        |         |
|------------------------------------------|--------|---------|
| Sepsis                                   | 3 (6)  | 2 (4)   |
| Other serious event                      | 1 (2)  | 0 (0)   |
| <b>Non-serious adverse events, n (%)</b> |        |         |
| Nausea                                   | 6 (13) | 8 (16)  |
| Dry mouth                                | 7 (15) | 11 (22) |
| Oral candidiasis                         | 2 (4)  | 0 (0)   |
| Other non-serious adverse event          | 3 (6)  | 1 (2)   |

Some pre-specified analyses were not performed due to small sample size or low number of events. These included statistical testing of differences in proportions and time-to-event analyses for non-key secondary outcomes, including death, invasive mechanical ventilation, and admission to an intensive care unit; the secondary outcome analyses of discharge from hospital; subgroup analyses for the secondary outcomes, and the primary outcome analysis after exclusion of participants who received invasive mechanical ventilation or died.

## Discussion

In this randomized open-label, controlled trial, including 98 hospitalized Covid-19 patients with ongoing oxygen therapy, treatment with inhaled ciclesonide did not result in a statistically significant reduction in the duration of oxygen therapy, used as a measure of time to clinical improvement. The trial ruled out, with 0.95 confidence, treatments effects of ciclesonide corresponding to more than a one-day reduction in duration of oxygen therapy.

1  
2  
3 While previous randomized controlled trials have assessed effects of inhaled  
4 corticosteroids, including budesonide[14, 15] and ciclesonide[16, 17], in non-  
5 hospitalized patients with Covid-19, this is the first trial that includes hospitalized  
6 patients with more severe forms of the disease. In contrast to our hypothesis, the  
7 median duration of oxygen therapy was nominally longer among patients assigned to  
8 ciclesonide vs standard care (5.5 vs 4 days; HR for termination of oxygen therapy  
9 0.73 (95% CI 0.47 to 1.11)). As such, the 95% CI indicates that,[22] even in the best  
10 case, ciclesonide may reduce the duration of oxygen therapy with only 10% (1-  
11 1/1.11; less than 1 day in our study) while it may in the worst case result in an over 2-  
12 fold increase. Thus, the results of this trial indicate that ciclesonide is unlikely to  
13 provide a clinically meaningful beneficial effect on the duration of oxygen therapy in  
14 hospitalized Covid-19 patients receiving oxygen therapy.

15  
16  
17  
18  
19  
20  
21  
22  
23  
24  
25  
26  
27  
28  
29  
30  
31  
32  
33 To date, 2 randomized controlled trials of ciclesonide in non-hospitalized patients with  
34 Covid-19 have been presented. In the CONTAIN study,[16] which was terminated  
35 early due to slow recruitment, 215 non-hospitalized patients with a median of 3 days  
36 symptom duration were randomized to combination treatment with intranasal and  
37 inhaled ciclesonide or placebo. No statistically significant difference between the  
38 groups was observed for the primary endpoint, resolution of respiratory symptoms at  
39 day 7 after randomization, which was reached by 40% of the patients in the treatment  
40 group vs 35% in the placebo group (adjusted risk difference of 5.5% (95% CI -7.8%  
41 to 18.8%).[16] Six (6%) patients assigned to ciclesonide vs 3 (3%) in the placebo  
42 group were hospitalized within 14 days; none died. In another clinical trial of  
43 ciclesonide, including 400 non-hospitalized patients with Covid-19,[17] randomization  
44 to ciclesonid vs placebo did not result in a reduced time to alleviation of all Covid-19  
45  
46  
47  
48  
49  
50  
51  
52  
53  
54  
55  
56  
57  
58  
59  
60

1  
2  
3 related symptoms. However, in secondary outcome analyses, patients assigned to  
4  
5 ciclesonide had fewer emergency department visits or hospital admissions for  
6  
7 reasons related to COVID-19 (odds ratio, 0.18, 95% CI, 0.04 to 0.85).  
8  
9

10  
11  
12 In addition, 2 randomized clinical trials of the inhaled corticosteroid budesonide in  
13  
14 non-hospitalized patients with Covid-19 have been presented. The STOIC trial was  
15  
16 an open-label trial comparing inhaled budesonide vs standard care in 146 Covid-19  
17  
18 patients with mild symptoms.[14] Compared to standard care, budesonide treatment  
19  
20 led to a statistically significant reduction in Covid-19-related emergency department  
21  
22 assessment and hospitalization (difference in proportions 0.123 (95% CI 0.043 to  
23  
24 0.218).[14] Furthermore, budesonide treatment was associated with 1 day shorter  
25  
26 time to clinical recovery. The PRINCIPLE trial was another open-label trial that  
27  
28 included 4700 primary care patients at high risk of developing severe Covid-19 (1073  
29  
30 randomized to budesonide treatment; 1988 to standard care; 1639 to other  
31  
32 treatments).[15] Compared to standard care, randomization to budesonide led to a  
33  
34 shorter time to self-reported recovery (difference 2.94 days (95% Bayesian credible  
35  
36 interval 1.19 to 5.12) and a reduced likelihood of hospital admission or death,  
37  
38 although the results for the latter outcomes did not meet the superiority threshold.  
39  
40  
41  
42  
43  
44  
45

46  
47 Taken together, the previous studies indicate that inhaled corticosteroids might be  
48  
49 useful for preventing deterioration of Covid-19 in non-hospitalized patients with mild  
50  
51 symptoms. It is possible that the low likelihood of benefit associated with ciclesonide  
52  
53 treatment observed in our study reflects the more severe pulmonary inflammation in  
54  
55 our study population, as indicated by the need for hospitalization with oxygen therapy  
56  
57 and a median symptom duration of 9 days: at such stages of disease progression, it  
58  
59  
60



1  
2  
3 could be speculated that pulmonary administration of corticosteroids may not suffice  
4  
5 to confer benefit and that systemic treatment is needed. Accordingly, in the Recovery  
6  
7 trial of hospitalized Covid-19 patients,[23] dexamethasone treatment reduced risk of  
8  
9 death and the time to discharge from hospital, with these benefits primarily being  
10  
11 observed among patients receiving oxygen therapy or invasive mechanical ventilation  
12  
13 at baseline.  
14  
15

16  
17  
18  
19 Similar to other clinical trials including patients with Covid-19,[15, 23, 24] we used a  
20  
21 pragmatic, open-label design. With this design, we intended to assess the effect of  
22  
23 adding ciclesonide to standard care, rather than to examine the effect of ciclesonide  
24  
25 compared to placebo. The research question that our study aimed to answer was  
26  
27 “what is the effect of using ciclesonide as an addition to standard care as compared  
28  
29 with standard care alone?” While this is a research question of relevance to clinical  
30  
31 decision-making, the open-label design and the possible expectations of effect  
32  
33 among both patients[25] and physicians might have affected the outcomes in our  
34  
35 study, including when to terminate oxygen therapy. Another limitation of our study is  
36  
37 that we were unable to recruit the intended number of patients due to the substantial  
38  
39 decrease in hospitalized Covid-19 patients in Sweden during 2021. Importantly, the  
40  
41 study could not provide much information regarding the key secondary outcome of  
42  
43 death or invasive mechanical intervention. Further research in hospitalized Covid-19  
44  
45 patients is needed to determine the potential effect of ciclesonide treatment on these  
46  
47 outcomes. Moreover, it is a possibility that effects of ciclesonide differ as compared to  
48  
49 other inhaled corticosteroids (e.g., budesonide). Finally, results from the Recovery  
50  
51 Trial were released 5 weeks after the initiation of our study and around half of the  
52  
53 patients in both the ciclesonide group and the control group received systemic  
54  
55  
56  
57  
58  
59  
60

1  
2  
3 corticosteroids after randomization. Further studies would be needed to assess the  
4  
5 comparative effectiveness and safety of ciclesonide vs systemic corticosteroids.  
6  
7  
8  
9

## 10 **Conclusions**

11  
12  
13 In this open-label randomized controlled trial in patients hospitalized with Covid-19  
14  
15 and receiving oxygen therapy, the findings indicated that treatment with ciclesonide  
16  
17 vs standard care is unlikely to result in a clinically meaningful reduction in the  
18  
19 duration of oxygen therapy.  
20  
21  
22  
23  
24  
25

## 26 **Acknowledgements**

27  
28  
29 We would like to thank the following individuals that did not qualify for authorship but  
30  
31 contributed to the study: Dr Oscar Bakhouch (Skaraborg Hospital), Dr Eva-Marie  
32  
33 Boman and Dr Anders Lundqvist (Southern Älvsborg Hospital).  
34  
35  
36  
37  
38  
39

## 40 **Contributorship statement**

41  
42  
43 DB, PU, PT, OB and DPA conceived the study and were responsible for the  
44  
45 methods. OB and DPA were responsible for the study conduct. DB, PU, OB and DPA  
46  
47 were responsible for the financing. PT validated the data. PU performed the main  
48  
49 analysis. DPA, PU and PT wrote the original draft of the manuscript. All authors  
50  
51 wrote, reviewed, and edited the manuscript. OB and DPA supervised the study. DB,  
52  
53 DPA, PU, PT and OB were responsible for administration of the project. DPA and OB  
54  
55 are the guarantors. DB, PT, AK, EW, SA, SW, OE, AN, AE, JG, JEK, BJ, JL, JLI, JH,  
56  
57 OB and DPA enrolled participants in the study. The corresponding author attests that  
58  
59  
60

1  
2  
3 all listed authors meet authorship criteria and that no others meeting the criteria have  
4  
5 been omitted.  
6  
7  
8  
9

### 10 **Competing interests**

11  
12 This study received non-financial support from COVIS Pharma (study drug donation).  
13  
14 The authors have no conflict of interest to disclose.  
15  
16  
17  
18

### 19 **Funding/Support**

20  
21  
22 This study was funded by the Swedish Heart and Lung Foundation (Number  
23  
24 20200421), The Axel and Margaret Ax:son Johnson Foundation (N/A), CIMED (N/A),  
25  
26 and Strategic Research Program at Karolinska Institutet (Number 961507), the  
27  
28 Stockholm County Council (Number: 954970, 963296, 962029), and the  
29  
30 Västmanland County Council (Grant nr LTV-938409). PU was supported by grants  
31  
32 from the Strategic Research Program in Epidemiology at Karolinska Institutet (N/A),  
33  
34 and a Faculty Funded Career Position at Karolinska Institutet (N/A).  
35  
36  
37  
38

39 The funders had no role in the study design, conduct, collection, management,  
40  
41 analysis, interpretation of data, writing or reviewing the manuscript or decision to  
42  
43 submit the manuscript for publication. The study drug was donated by COVIS  
44  
45 Pharma but COVIS pharma did not participate in any other part of the study.  
46  
47  
48  
49

### 50 **Data sharing statement**

51  
52 No additional data available.  
53  
54  
55  
56

### 57 **Ethics Approval**

1  
2  
3 All participants provided written informed consent. The study was approved by the  
4  
5 Swedish Ethical Review Authority (Ethics committee number 2020-02183) and the  
6  
7 Swedish Medical Products Agency (Eudra-CT number 2020-001928-34) and  
8  
9 registered at clinicaltrials.gov (NCT04381364).  
10  
11  
12  
13

## 14 **References**

- 15  
16 1. Gibson PG, Qin L, Puah SH. COVID-19 acute respiratory distress syndrome  
17  
18 (ARDS): clinical features and differences from typical pre-COVID-19 ARDS. *Med J*  
19  
20 *Aust* **2020**; 213:54-6 e1.  
21  
22
- 23  
24 2. Bos LDJ. COVID-19-related Acute Respiratory Distress Syndrome: Not So  
25  
26 Atypical. *Am J Respir Crit Care Med* **2020**; 202:622-4.  
27  
28
- 29  
30 3. Festic E, Carr GE, Cartin-Ceba R, et al. Randomized Clinical Trial of a  
31  
32 Combination of an Inhaled Corticosteroid and Beta Agonist in Patients at Risk of  
33  
34 Developing the Acute Respiratory Distress Syndrome. *Crit Care Med* **2017**; 45:798-  
35  
36 805.  
37  
38
- 39  
40 4. Mohamed HS, Meguid MM. Effect of nebulized budesonide on respiratory  
41  
42 mechanics and oxygenation in acute lung injury/acute respiratory distress syndrome:  
43  
44 Randomized controlled study. *Saudi J Anaesth* **2017**; 11:9-14.  
45  
46
- 47  
48 5. Jansson AH, Eriksson C, Wang X. Effects of budesonide and N-acetylcysteine on  
49  
50 acute lung hyperinflation, inflammation and injury in rats. *Vascul Pharmacol* **2005**;  
51  
52 43:101-11.  
53  
54
- 55  
56 6. Forsgren PE, Modig JA, Dahlback CM, Axelsson BI. Prophylactic treatment with an  
57  
58 aerosolized corticosteroid liposome in a porcine model of early ARDS induced by  
59  
60 endotoxaemia. *Acta Chir Scand* **1990**; 156:423-31.

- 1  
2  
3 7. Wang J, Zhang L, Walther SM. Administration of aerosolized terbutaline and  
4  
5 budesonide reduces chlorine gas-induced acute lung injury. *J Trauma* **2004**; 56:850-  
6  
7 62.  
8
- 9  
10 8. Walther S, Jansson I, Berg S, Lennquist S. Pulmonary granulocyte accumulation is  
11  
12 reduced by nebulized corticosteroid in septic pigs. *Acta Anaesthesiol Scand* **1992**;  
13  
14 36:651-5.  
15
- 16  
17 9. Yamaya M, Nishimura H, Deng X, et al. Inhibitory effects of glycopyrronium,  
18  
19 formoterol, and budesonide on coronavirus HCoV-229E replication and cytokine  
20  
21 production by primary cultures of human nasal and tracheal epithelial cells. *Respir*  
22  
23 *Investig* **2020**; 58:155-68.  
24
- 25  
26 10. Peters MC, Sajuthi S, Deford P, et al. COVID-19-related Genes in Sputum Cells  
27  
28 in Asthma. Relationship to Demographic Features and Corticosteroids. *Am J Respir*  
29  
30 *Crit Care Med* **2020**; 202:83-90.  
31
- 32  
33 11. Milne S, Li X, Yang CX, et al. Inhaled corticosteroids downregulate SARS-CoV-2-  
34  
35 related genes in COPD: results from a randomised controlled trial. *Eur Respir J* **2021**;  
36  
37 58.  
38
- 39  
40 12. Jeon S, Ko M, Lee J, et al. Identification of Antiviral Drug Candidates against  
41  
42 SARS-CoV-2 from FDA-Approved Drugs. *Antimicrob Agents Chemother* **2020**; 64.  
43
- 44  
45 13. Kimura H, Kurusu H, Sada M, et al. Molecular pharmacology of ciclesonide  
46  
47 against SARS-CoV-2. *J Allergy Clin Immunol* **2020**; 146:330-1.  
48
- 49  
50 14. Ramakrishnan S, Nicolau DV, Jr., Langford B, et al. Inhaled budesonide in the  
51  
52 treatment of early COVID-19 (STOIC): a phase 2, open-label, randomised controlled  
53  
54 trial. *Lancet Respir Med* **2021**; 9:763-72.  
55  
56  
57  
58  
59  
60

15. Yu LM, Bafadhel M, Dorward J, et al. Inhaled budesonide for COVID-19 in people at high risk of complications in the community in the UK (PRINCIPLE): a randomised, controlled, open-label, adaptive platform trial. *Lancet* **2021**; 398:843-55.
16. Ezer N, Belga S, Daneman N, et al. Inhaled and intranasal ciclesonide for the treatment of covid-19 in adult outpatients: CONTAIN phase II randomised controlled trial. *BMJ* **2021**; 375:e068060.
17. Clemency BM, Varughese R, Gonzalez-Rojas Y, et al. Efficacy of Inhaled Ciclesonide for Outpatient Treatment of Adolescents and Adults With Symptomatic COVID-19: A Randomized Clinical Trial. *JAMA Intern Med* **2021**.
18. Characterisation WHO/WGOTC, Management of C-i. A minimal common outcome measure set for COVID-19 clinical research. *Lancet Infect Dis* **2020**; 20:e192-e7.
19. Mahler DA, Wells CK. Evaluation of clinical methods for rating dyspnea. *Chest* **1988**; 93:580-6.
20. Bestall JC, Paul EA, Garrod R, Garnham R, Jones PW, Wedzicha JA. Usefulness of the Medical Research Council (MRC) dyspnoea scale as a measure of disability in patients with chronic obstructive pulmonary disease. *Thorax* **1999**; 54:581-6.
21. Directive 2001/20/EC of the European Parliament and of the Council of 4 April 2001 on the approximation of the laws, regulations and administrative provisions of the member states relating to the implementation of good clinical practice in the conduct of clinical trials on medicinal products for human use. *Med Etika Bioet* **2002**; 9:12-9.
22. Hawkins AT, Samuels LR. Use of Confidence Intervals in Interpreting Nonstatistically Significant Results. *JAMA* **2021**; 326:2068-9.
23. Group RC, Horby P, Lim WS, et al. Dexamethasone in Hospitalized Patients with Covid-19. *N Engl J Med* **2021**; 384:693-704.

- 1  
2  
3 24. Investigators R-C, Gordon AC, Mouncey PR, et al. Interleukin-6 Receptor  
4 Antagonists in Critically Ill Patients with Covid-19. N Engl J Med **2021**; 384:1491-502.  
5  
6  
7 25. Wechsler ME, Kelley JM, Boyd IO, et al. Active albuterol or placebo, sham  
8 acupuncture, or no intervention in asthma. N Engl J Med **2011**; 365:119-26.  
9  
10  
11  
12  
13  
14  
15  
16  
17  
18  
19  
20  
21  
22  
23  
24  
25  
26  
27  
28  
29  
30  
31  
32  
33  
34  
35  
36  
37  
38  
39  
40  
41  
42  
43  
44  
45  
46  
47  
48  
49  
50  
51  
52  
53  
54  
55  
56  
57  
58  
59  
60

For peer review only

1  
2  
3 **Figure 1** Flow diagram for study participants.  
4

5 **Figure 2** Time to termination of oxygen therapy.  
6  
7  
8  
9  
10  
11  
12  
13  
14  
15  
16  
17  
18  
19  
20  
21  
22  
23  
24  
25  
26  
27  
28  
29  
30  
31  
32  
33  
34  
35  
36  
37  
38  
39  
40  
41  
42  
43  
44  
45  
46  
47  
48  
49  
50  
51  
52  
53  
54  
55  
56  
57  
58  
59  
60

For peer review only



1 **Figure 1**  
2  
3  
4  
5  
6  
7  
8

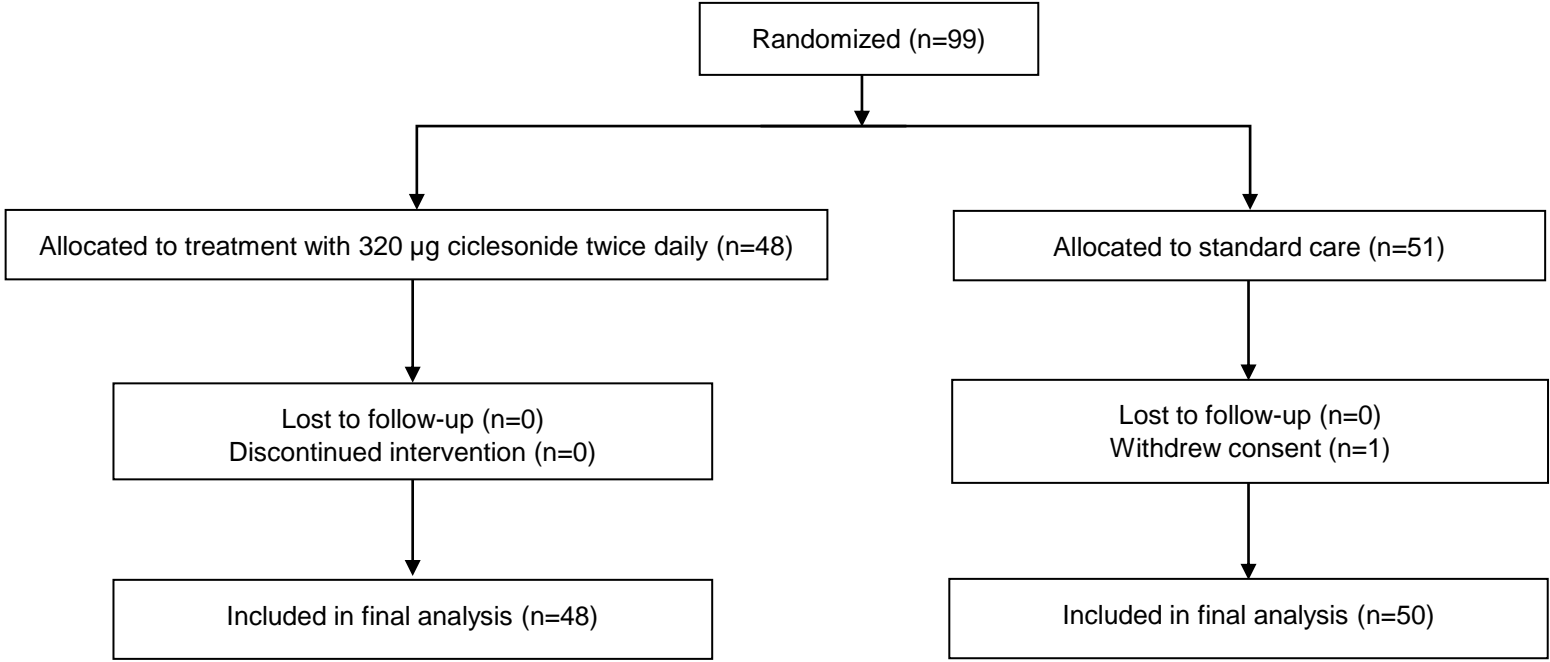

26  
27  
28  
29  
30  
31  
32  
33  
34  
35  
36  
37  
38  
39  
40  
41

**Figure 2** Time to termination of oxygen therapy.

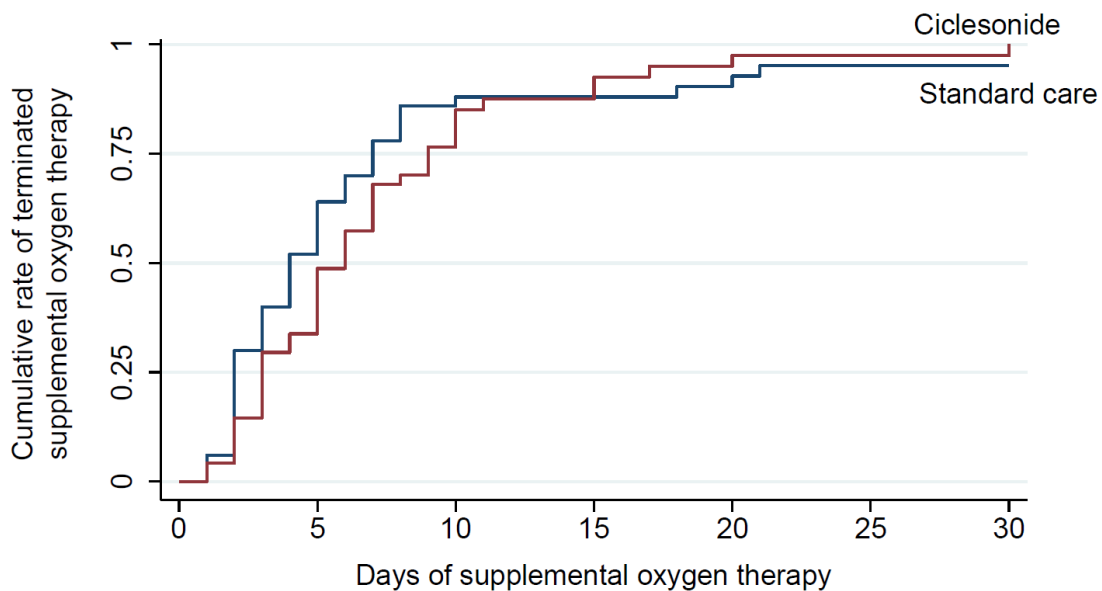

| No at risk    |    |    |    |   |   |   |   |
|---------------|----|----|----|---|---|---|---|
| Standard care | 50 | 24 | 7  | 6 | 4 | 2 | 2 |
| Ciclesonide   | 48 | 31 | 11 | 5 | 2 | 1 | 1 |

ew only

**ONLINE APPENDIX**

Brodin D, Tornhammar P, Ueda P, Krifors A, Westerlund E, Athlin S, Wojt S, Elvstam O, Neumann A, Elshani A, Giesecke J, Edvardsson J, Bunpuckdee S, Unge C, Larsson M, Johansson B, Ljungberg J, Lindell J, Hansson J, Blennow O, Andersson DP. Inhaled Ciclesonide in Adults Hospitalized with Covid-19: a Randomized Controlled Open-label Trial (HALT Covid-19).

For peer review only

## Protocol changes and rationale

The trial was designed in the beginning of the covid-19 pandemic when data from randomized clinical trials of Covid-19 treatment were scarce. After trial initiation, treatments for patients with Covid-19 and hospitalization rates of such patients changed rapidly. Therefore, we made changes to the protocol and the trial was stopped early.

5 weeks after the start of patient inclusion in our study, in July 2020, the Recovery Collaborative group presented preliminary data<sup>1</sup> showing protective effects of dexamethasone treatment in patients hospitalized for covid-19; a subgroup analysis of this study indicated that the effect was driven by patients receiving invasive mechanical ventilation or oxygen therapy. These data, in combination with local experience from treating patients with Covid-19,<sup>2</sup> led to most patients receiving oxygen therapy with  $\geq 4$  L oxygen/min at the study hospitals being treated with systemic corticosteroids. As use of systemic corticosteroids was an exclusion criterion, the change in practice made a large proportion of the Covid-19 patients ineligible for participation.

Initially the trial was conducted at 4 hospitals. To increase the inclusion rate, 9 additional hospitals were included as study sites, although only 5 of them ended up recruiting patients to the study. We also removed the previous upper age limit of 85 years for inclusion and allowed for inclusion of patients based on a positive antigen test for SARS-CoV-2. Moreover, because some patients may start receiving oxygen therapy before hospital admission (e.g., at nursing homes before being transported

1  
2  
3 to the hospital) or a period after hospital admission (e.g., if the patient's condition  
4 deteriorated) and we aimed to include patients shortly after initiation of such therapy,  
5  
6 we changed the inclusion criteria from hospitalization within 48 hours prior to  
7  
8 enrollment to initiation of oxygen therapy no longer than 48 hours prior to enrollment.  
9  
10  
11  
12  
13

14 All changes were approved by the Data Monitoring Committee, Ethical Review  
15 Authority and the Swedish Medical Products Agency and implemented from  
16  
17 December 2020.  
18  
19  
20  
21  
22  
23

24 In June 2021, when 99 patients had been included in the study, a large and  
25 increasing proportion of the adult Swedish population had received vaccination for  
26  
27 Covid-19. The number of patients hospitalized with Covid-19 had dropped  
28  
29 substantially and there were none to only a few Covid-19 patients admitted to the  
30  
31 study hospitals per week. We determined that it was unlikely that we would reach the  
32  
33 intended sample size and asked the Data Monitoring Committee to convene for a  
34  
35 meeting. Following the recommendation of the Data Monitoring Committee, the study  
36  
37 was terminated early due to expected futility to meet total enrolment.  
38  
39  
40  
41  
42  
43  
44  
45  
46  
47  
48  
49  
50  
51  
52  
53  
54  
55  
56  
57  
58  
59  
60

### Inclusion and exclusion criteria<sup>a</sup>

Participants were eligible for inclusion if, at the time of study inclusion, they (1) were aged  $\geq 18$  years, (2) had a polymerase chain reaction confirmed SARS-CoV-2 infection or a positive antigen test for SARS-CoV-2, (3) were hospitalized at any of the study hospitals and (4) were receiving oxygen therapy with not more than 48 hours having passed since initiation of this treatment.

Patients were not eligible for inclusion if they (1) had a history of hypersensitivity to ciclesonide or other substances included in the treatment, (2) received ongoing treatment with inhaled or oral corticosteroids, ketokonazol, itrakonazol, ritonavir or nelfinavir, (3) received  $>8$  L oxygen/min or  $>50$  % oxygen with nasal high-flow therapy, (4) were receiving or under consideration for palliative care or had an expected survival of less than 72 h, (5) were expected to be admitted to an intensive care unit within 48 h, (6) had active or inactive pulmonary tuberculosis, severe liver failure (Child-Pugh C), pulmonary arterial hypertension or fibrosis, cognitive or physical impairment, (7) had insufficient language skills to understand information given about the study, (8) had been included in a clinical trial within 30 days, or (9) were women and pregnant, breastfeeding or did not agree to take highly effective contraceptive measures while receiving treatment plus an additional 7 days.

<sup>a</sup> The presentation of these inclusion and exclusion criteria have been modified for readability as compared with the version presented in the study protocol.

**Appendix table 1** Number of participants included in the final study population by study center.

| <i>Study center</i>                     | <i>n participants</i> |
|-----------------------------------------|-----------------------|
| Danderyd Hospital                       | 26                    |
| Capio S:t Göran Hospital                | 24                    |
| Karolinska University Hospital          | 21                    |
| Västmanland County Hospital             | 13                    |
| Örebro University Hospital <sup>a</sup> | 6                     |
| Växjö Central Hospital <sup>a</sup>     | 3                     |
| Halland County Hospital <sup>a</sup>    | 2                     |
| Östersund Hospital <sup>a</sup>         | 2                     |
| Visby Hospital <sup>a</sup>             | 1                     |

<sup>a</sup> In the analyses adjusted for study center, these hospitals were categorized into one group.

## References

1. RECOVERY Collaborative Group, Horby P, Lim WS, et al. Dexamethasone in Hospitalized Patients with Covid-19. *N Engl J Med*. Feb 25 2021;384(8):693-704. doi:10.1056/NEJMoa2021436
2. Kan B, Ahl M, Blennow O, et al. *Lakartidningen*. Oct 6 2020;117 Tidiga erfarenheter av steroidbehandling vid covid-19.
3. Fu Y, Cheng Y, Wu Y. Understanding SARS-CoV-2-Mediated Inflammatory Responses: From Mechanisms to Potential Therapeutic Tools. *Virology*. Jun 2020;35(3):266-271. doi:10.1007/s12250-020-00207-4
4. Zhai P, Ding Y, Wu X, Long J, Zhong Y, Li Y. The epidemiology, diagnosis and treatment of COVID-19. *Int J Antimicrob Agents*. May 2020;55(5):105955. doi:10.1016/j.ijantimicag.2020.105955
5. Liu XX, Zhu XM, Miao Q, Ye HY, Zhang ZY, Li YM. Hyperglycemia induced by glucocorticoids in nondiabetic patients: a meta-analysis. *Ann Nutr Metab*. 2014;65(4):324-32. doi:10.1159/000365892
6. Patten SB, Neutel CI. Corticosteroid-induced adverse psychiatric effects: incidence, diagnosis and management. *Drug Saf*. Feb 2000;22(2):111-22. doi:10.2165/00002018-200022020-00004
7. Dubovsky AN, Arvikar S, Stern TA, Axelrod L. The neuropsychiatric complications of glucocorticoid use: steroid psychosis revisited. *Psychosomatics*. Mar-Apr 2012;53(2):103-15. doi:10.1016/j.psych.2011.12.007



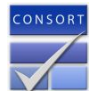

## CONSORT 2010 checklist of information to include when reporting a randomised trial\*

| Section/Topic                    | Item No | Checklist item                                                                                                                                                                              | Reported on page No |
|----------------------------------|---------|---------------------------------------------------------------------------------------------------------------------------------------------------------------------------------------------|---------------------|
| <b>Title and abstract</b>        |         |                                                                                                                                                                                             |                     |
|                                  | 1a      | Identification as a randomised trial in the title                                                                                                                                           | 1                   |
|                                  | 1b      | Structured summary of trial design, methods, results, and conclusions (for specific guidance see CONSORT for abstracts)                                                                     | 3                   |
| <b>Introduction</b>              |         |                                                                                                                                                                                             |                     |
| Background and objectives        | 2a      | Scientific background and explanation of rationale                                                                                                                                          | 5,6                 |
|                                  | 2b      | Specific objectives or hypotheses                                                                                                                                                           | 5-7                 |
| <b>Methods</b>                   |         |                                                                                                                                                                                             |                     |
| Trial design                     | 3a      | Description of trial design (such as parallel, factorial) including allocation ratio                                                                                                        | 6-9                 |
|                                  | 3b      | Important changes to methods after trial commencement (such as eligibility criteria), with reasons                                                                                          | 6,7,9               |
| Participants                     | 4a      | Eligibility criteria for participants                                                                                                                                                       | 7,8                 |
|                                  | 4b      | Settings and locations where the data were collected                                                                                                                                        | 6,7                 |
| Interventions                    | 5       | The interventions for each group with sufficient details to allow replication, including how and when they were actually administered                                                       | 6-11                |
| Outcomes                         | 6a      | Completely defined pre-specified primary and secondary outcome measures, including how and when they were assessed                                                                          | 9-11                |
|                                  | 6b      | Any changes to trial outcomes after the trial commenced, with reasons                                                                                                                       | 6,7                 |
| Sample size                      | 7a      | How sample size was determined                                                                                                                                                              | 6-9                 |
|                                  | 7b      | When applicable, explanation of any interim analyses and stopping guidelines                                                                                                                | 6,7                 |
| <b>Randomisation:</b>            |         |                                                                                                                                                                                             |                     |
| Sequence generation              | 8a      | Method used to generate the random allocation sequence                                                                                                                                      | 8                   |
|                                  | 8b      | Type of randomisation; details of any restriction (such as blocking and block size)                                                                                                         | 8                   |
| Allocation concealment mechanism | 9       | Mechanism used to implement the random allocation sequence (such as sequentially numbered containers), describing any steps taken to conceal the sequence until interventions were assigned | 8                   |
| Implementation                   | 10      | Who generated the random allocation sequence, who enrolled participants, and who assigned participants to interventions                                                                     | 8                   |
| Blinding                         | 11a     | If done, who was blinded after assignment to interventions (for example, participants, care providers, those                                                                                | 8,11                |

|                                                      |     |                                                                                                                                                   |       |
|------------------------------------------------------|-----|---------------------------------------------------------------------------------------------------------------------------------------------------|-------|
|                                                      |     | assessing outcomes) and how                                                                                                                       |       |
|                                                      | 11b | If relevant, description of the similarity of interventions                                                                                       | -     |
| Statistical methods                                  | 12a | Statistical methods used to compare groups for primary and secondary outcomes                                                                     | 10,11 |
|                                                      | 12b | Methods for additional analyses, such as subgroup analyses and adjusted analyses                                                                  | 10,11 |
| <b>Results</b>                                       |     |                                                                                                                                                   |       |
| Participant flow (a diagram is strongly recommended) | 13a | For each group, the numbers of participants who were randomly assigned, received intended treatment, and were analysed for the primary outcome    | 11-13 |
|                                                      | 13b | For each group, losses and exclusions after randomisation, together with reasons                                                                  | 11-13 |
| Recruitment                                          | 14a | Dates defining the periods of recruitment and follow-up                                                                                           | 6,7   |
|                                                      | 14b | Why the trial ended or was stopped                                                                                                                | 7     |
| Baseline data                                        | 15  | A table showing baseline demographic and clinical characteristics for each group                                                                  | Yes   |
| Numbers analysed                                     | 16  | For each group, number of participants (denominator) included in each analysis and whether the analysis was by original assigned groups           | Yes   |
| Outcomes and estimation                              | 17a | For each primary and secondary outcome, results for each group, and the estimated effect size and its precision (such as 95% confidence interval) | Yes   |
|                                                      | 17b | For binary outcomes, presentation of both absolute and relative effect sizes is recommended                                                       | -     |
| Ancillary analyses                                   | 18  | Results of any other analyses performed, including subgroup analyses and adjusted analyses, distinguishing pre-specified from exploratory         | 10,11 |
| Harms                                                | 19  | All important harms or unintended effects in each group (for specific guidance see CONSORT for harms)                                             | 13    |
| <b>Discussion</b>                                    |     |                                                                                                                                                   |       |
| Limitations                                          | 20  | Trial limitations, addressing sources of potential bias, imprecision, and, if relevant, multiplicity of analyses                                  | 13-17 |
| Generalisability                                     | 21  | Generalisability (external validity, applicability) of the trial findings                                                                         | 13-17 |
| Interpretation                                       | 22  | Interpretation consistent with results, balancing benefits and harms, and considering other relevant evidence                                     | 13-17 |
| <b>Other information</b>                             |     |                                                                                                                                                   |       |
| Registration                                         | 23  | Registration number and name of trial registry                                                                                                    | 6     |
| Protocol                                             | 24  | Where the full trial protocol can be accessed, if available                                                                                       | -     |
| Funding                                              | 25  | Sources of funding and other support (such as supply of drugs), role of funders                                                                   | 18,19 |

\*We strongly recommend reading this statement in conjunction with the CONSORT 2010 Explanation and Elaboration for important clarifications on all the items. If relevant, we also recommend reading CONSORT extensions for cluster randomised trials, non-inferiority and equivalence trials, non-pharmacological treatments, herbal interventions, and pragmatic trials. Additional extensions are forthcoming: for those and for up to date references relevant to this checklist, see [www.consort-statement.org](http://www.consort-statement.org).

# BMJ Open

## Inhaled Ciclesonide in Adults Hospitalized with Covid-19: a Randomized Controlled Open-label Trial (HALT Covid-19)

|                                 |                                                                                                                                                                                                                                                                                                                                                                                                                                                                                                                                                                                                                                                                                                                                                                                                                                                                                                                                                                                                                                                                                                                                                                                                                                                                                                                                                                                                                                                                                                                                    |
|---------------------------------|------------------------------------------------------------------------------------------------------------------------------------------------------------------------------------------------------------------------------------------------------------------------------------------------------------------------------------------------------------------------------------------------------------------------------------------------------------------------------------------------------------------------------------------------------------------------------------------------------------------------------------------------------------------------------------------------------------------------------------------------------------------------------------------------------------------------------------------------------------------------------------------------------------------------------------------------------------------------------------------------------------------------------------------------------------------------------------------------------------------------------------------------------------------------------------------------------------------------------------------------------------------------------------------------------------------------------------------------------------------------------------------------------------------------------------------------------------------------------------------------------------------------------------|
| Journal:                        | <i>BMJ Open</i>                                                                                                                                                                                                                                                                                                                                                                                                                                                                                                                                                                                                                                                                                                                                                                                                                                                                                                                                                                                                                                                                                                                                                                                                                                                                                                                                                                                                                                                                                                                    |
| Manuscript ID                   | bmjopen-2022-064374.R1                                                                                                                                                                                                                                                                                                                                                                                                                                                                                                                                                                                                                                                                                                                                                                                                                                                                                                                                                                                                                                                                                                                                                                                                                                                                                                                                                                                                                                                                                                             |
| Article Type:                   | Original research                                                                                                                                                                                                                                                                                                                                                                                                                                                                                                                                                                                                                                                                                                                                                                                                                                                                                                                                                                                                                                                                                                                                                                                                                                                                                                                                                                                                                                                                                                                  |
| Date Submitted by the Author:   | 08-Nov-2022                                                                                                                                                                                                                                                                                                                                                                                                                                                                                                                                                                                                                                                                                                                                                                                                                                                                                                                                                                                                                                                                                                                                                                                                                                                                                                                                                                                                                                                                                                                        |
| Complete List of Authors:       | <p>Brodin, Daniel; Capio Sankt Görans Sjukhus<br/> Tornhammar, Per; Karolinska Institute, Functional Area of Emergency Medicine<br/> Ueda, Peter; Karolinska Institutet<br/> Krifors, Anders; Karolinska Institutet, Department of Physiology and Pharmacology; Västmanlands sjukhus Västerås<br/> Westerlund, Eli; Danderyd University Hospital, Department of Clinical Sciences<br/> Athlin, Simon; Örebro University<br/> Wojt, Sandra; Danderyd University Hospital, Department of Internal Medicine<br/> Elvstam, Olof; Central Hospital Växjö, Department of Infectious Diseases<br/> Neumann, Anca; Capio Sankt Görans Sjukhus<br/> Elshani, Arsim; Karlskoga Hospital<br/> Giesecke, Julia; Karolinska Universitetssjukhuset<br/> Edvardsson-Källkvist, Jens; Karolinska University Hospital<br/> Bunpuckdee, Sayam; Karolinska Institutet<br/> Unge, Christian; Danderyd University Hospital, Department of Internal Medicine<br/> Larsson, Martin; Karolinska Institutet Department of Clinical Science and Education Sodersjukhuset<br/> Johansson, Björn; Halland County<br/> Ljungberg, Johan; Halland County<br/> Lindell, Jonas; Visby Hospital, Department of Infectious Diseases<br/> Hansson, Johan; Östersund Hospital, Department of Infectious Diseases<br/> Blennow, Ola; Karolinska University Hospital, Department of Infectious Diseases<br/> Andersson, Daniel Peter; Karolinska University Hospital, Department of Medicine Huddinge H7, Karolinska Institutet; Karolinska Institute, Medicine (H7)</p> |
| <b>Primary Subject Heading</b>: | Infectious diseases                                                                                                                                                                                                                                                                                                                                                                                                                                                                                                                                                                                                                                                                                                                                                                                                                                                                                                                                                                                                                                                                                                                                                                                                                                                                                                                                                                                                                                                                                                                |
| Secondary Subject Heading:      | Respiratory medicine                                                                                                                                                                                                                                                                                                                                                                                                                                                                                                                                                                                                                                                                                                                                                                                                                                                                                                                                                                                                                                                                                                                                                                                                                                                                                                                                                                                                                                                                                                               |
| Keywords:                       | COVID-19, Clinical trials < THERAPEUTICS, Respiratory infections < THORACIC MEDICINE                                                                                                                                                                                                                                                                                                                                                                                                                                                                                                                                                                                                                                                                                                                                                                                                                                                                                                                                                                                                                                                                                                                                                                                                                                                                                                                                                                                                                                               |
|                                 |                                                                                                                                                                                                                                                                                                                                                                                                                                                                                                                                                                                                                                                                                                                                                                                                                                                                                                                                                                                                                                                                                                                                                                                                                                                                                                                                                                                                                                                                                                                                    |

1  
2  
3  
4  
5  
6  
7  
8  
9  
10  
11  
12  
13  
14  
15  
16  
17  
18  
19  
20  
21  
22  
23  
24  
25  
26  
27  
28  
29  
30  
31  
32  
33  
34  
35  
36  
37  
38  
39  
40  
41  
42  
43  
44  
45  
46  
47  
48  
49  
50  
51  
52  
53  
54  
55  
56  
57  
58  
59  
60

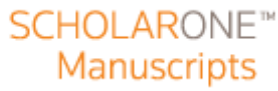

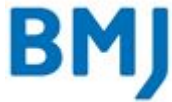

I, the Submitting Author has the right to grant and does grant on behalf of all authors of the Work (as defined in the below author licence), an exclusive licence and/or a non-exclusive licence for contributions from authors who are: i) UK Crown employees; ii) where BMJ has agreed a CC-BY licence shall apply, and/or iii) in accordance with the terms applicable for US Federal Government officers or employees acting as part of their official duties; on a worldwide, perpetual, irrevocable, royalty-free basis to BMJ Publishing Group Ltd ("BMJ") its licensees and where the relevant Journal is co-owned by BMJ to the co-owners of the Journal, to publish the Work in this journal and any other BMJ products and to exploit all rights, as set out in our [licence](#).

The Submitting Author accepts and understands that any supply made under these terms is made by BMJ to the Submitting Author unless you are acting as an employee on behalf of your employer or a postgraduate student of an affiliated institution which is paying any applicable article publishing charge ("APC") for Open Access articles. Where the Submitting Author wishes to make the Work available on an Open Access basis (and intends to pay the relevant APC), the terms of reuse of such Open Access shall be governed by a Creative Commons licence – details of these licences and which [Creative Commons](#) licence will apply to this Work are set out in our licence referred to above.

Other than as permitted in any relevant BMJ Author's Self Archiving Policies, I confirm this Work has not been accepted for publication elsewhere, is not being considered for publication elsewhere and does not duplicate material already published. I confirm all authors consent to publication of this Work and authorise the granting of this licence.

# Inhaled Ciclesonide in Adults Hospitalized with Covid-19: a Randomized Controlled Open-label Trial (HALT Covid-19)

Daniel Brodin<sup>1\*</sup>, MD; Per Tornhammar<sup>2,3\*</sup>, MD; Peter Ueda<sup>4\*\*</sup>, MD, PhD; Anders Krifors<sup>5,6</sup> MD; Eli Westerlund<sup>7</sup>, MD, PhD; Simon Athlin<sup>8</sup>, MD, PhD; Sandra Wojt<sup>9</sup>, MD; Olof Elvstam<sup>10</sup>, MD, PhD; Anca Neumann<sup>1</sup>, MD; Arsim Elshani<sup>11</sup>, MD; Julia Giesecke<sup>3</sup> MD; Jens Edvardsson-Källkvist<sup>3</sup>, MD; Sayam Bunpuckdee<sup>12</sup>, MD student; Christian Unge<sup>9</sup>, MD, PhD; Martin Larsson<sup>13,14</sup>, MD, PhD; Björn Johansson<sup>15</sup>, MD; Johan Ljungberg<sup>15</sup>, MD; Jonas Lindell<sup>16</sup>, MD; Johan Hansson<sup>17</sup>, MD, PhD; Ola Blennow<sup>1,3,18#</sup>, MD, PhD, Daniel P Andersson<sup>3,13#</sup> MD, PhD

\*Equal contributions

#Equal contributions

\*\*Corresponding author

## Correspondence

Ola Blennow MD, PhD Address: Department of Infectious Diseases, Karolinska University Hospital, Huddinge, 14141 Stockholm Sweden

Email: [ola.blennow@regionstockholm.se](mailto:ola.blennow@regionstockholm.se)

Phone: +46739813617

## Affiliations:

<sup>1</sup> Department of Internal Medicine, Capio St Göran's Hospital, Stockholm, Sweden

<sup>2</sup> Functional Area of Emergency Medicine, Karolinska University Hospital Huddinge, Stockholm, Sweden

1  
2  
3 <sup>3</sup> Department of Medicine (H7), Karolinska Institutet, Karolinska University Hospital,  
4  
5 Huddinge, 141 86 Stockholm, Sweden  
6

7 <sup>4</sup> Clinical Epidemiology Division, Department of Medicine Solna, Karolinska Institutet,  
8  
9 Stockholm, Sweden  
10

11  
12  
13 <sup>5</sup> Department of Physiology and Pharmacology, Karolinska Institutet, Stockholm,  
14  
15 Sweden.  
16

17  
18 <sup>6</sup> Centre for Clinical Research Västmanland, Uppsala University, Västmanland  
19  
20 County Hospital, Västerås, Sweden.  
21

22 <sup>7</sup> Department of Clinical Sciences, Karolinska Institutet, Danderyd Hospital,  
23  
24 Stockholm, Sweden  
25

26  
27 <sup>8</sup> School of Medical Sciences, Faculty of Medicine, Örebro University, Örebro,  
28  
29 Sweden  
30

31 <sup>9</sup> Department of Internal Medicine, Danderyd Hospital, Stockholm, Sweden  
32

33 <sup>10</sup> Department of Infectious Diseases, Växjö Central Hospital, Växjö, Sweden  
34

35  
36 <sup>11</sup> Department in Geriatric Medicine at Karlskoga Hospital, Karlskoga, Sweden  
37

38 <sup>12</sup> At the time of the study: Department of Medicine (H7), Karolinska Institutet,  
39  
40 Stockholm, Sweden  
41

42  
43 <sup>13</sup> Department of Endocrinology, Karolinska University Hospital, Stockholm, Sweden  
44

45 <sup>14</sup> Department of Molecular Medicine and Surgery (K1), Karolinska Institutet,  
46  
47 Stockholm, Sweden  
48

49  
50 <sup>15</sup> Department of Infectious Diseases Halland County Hospital Halmstad, Halmstad,  
51  
52 Sweden  
53

54 <sup>16</sup> Department of Infectious Diseases, Visby Hospital, Visby, Sweden  
55

56  
57 <sup>17</sup> Department of Infectious Diseases, Östersund Hospital, Östersund, Sweden  
58  
59  
60

1  
2  
3 <sup>18</sup> Department of Infectious Diseases, Karolinska University Hospital, Stockholm,  
4  
5 Sweden

6  
7  
8 Word count: 3076  
9

10  
11 Abstract word count: 250  
12  
13  
14  
15  
16  
17  
18  
19  
20  
21  
22  
23  
24  
25  
26  
27  
28  
29  
30  
31  
32  
33  
34  
35  
36  
37  
38  
39  
40  
41  
42  
43  
44  
45  
46  
47  
48  
49  
50  
51  
52  
53  
54  
55  
56  
57  
58  
59  
60

For peer review only



## Abstract

**Objective:** To assess the efficacy of inhaled ciclesonide in reducing the duration of oxygen therapy (an indicator of time to clinical improvement) among adults hospitalized with Covid-19.

**Design:** Multicenter, randomized, controlled, open-label trial.

**Setting:** 9 hospitals (3 academic hospitals and 6 non-academic hospitals) in Sweden between June 1, 2020, and May 17, 2021.

**Participants:** Adults hospitalized with Covid-19 and receiving oxygen therapy.

**Intervention:** Inhaled ciclesonide 320 µg twice daily for 14 days versus standard care.

**Main outcome measures:** Primary outcome was duration of oxygen therapy, an indicator of time to clinical improvement. Key secondary outcome was a composite of invasive mechanical ventilation/death.

**Results:** Data from 98 participants were analyzed (48 receiving ciclesonide and 50 receiving standard care; median (IQR) age, 59.5 (49-67) years; 67 (68%) male). Median (IQR) duration of oxygen therapy was 5.5 (3-9) days in the ciclesonide group and 4 (2-7) days in the standard care group (hazard ratio (HR) for termination of oxygen therapy 0.73 (95% CI 0.47-1.11), with the upper 95% CI being compatible with a 10% relative reduction in oxygen therapy duration, corresponding to a <1-day absolute reduction in a post-hoc calculation). Three participants in each group died/received invasive mechanical ventilation (HR 0.90 (95% CI 0.15-5.32)). The trial was discontinued early due to slow enrollment.

1  
2  
3 **Conclusions:** In hospitalized Covid-19 patients receiving oxygen therapy, this trial  
4 ruled out, with 0.95 confidence, a treatment effect of ciclesonide corresponding to  
5 more than a one-day reduction in duration of oxygen therapy. Ciclesonide is unlikely  
6 to improve this outcome meaningfully.  
7  
8  
9  
10  
11  
12  
13  
14  
15

### 16 **Strengths and limitations of this study**

- 17 • This was a multicenter, randomized, controlled, open-label trial comparing  
18 treatment with the inhaled corticosteroid ciclesonide 320 µg twice daily for 14  
19 days versus standard care.  
20
- 21 • Healthcare providers and participants were not blinded to treatment  
22 assignment.  
23
- 24 • The trial was terminated early due to slow recruitment.  
25  
26  
27  
28  
29  
30  
31  
32  
33  
34  
35  
36  
37  
38  
39  
40  
41  
42  
43  
44  
45  
46  
47  
48  
49  
50  
51  
52  
53  
54  
55  
56  
57  
58  
59  
60

## Introduction

Patients with Covid-19 can develop acute respiratory failure that may require invasive mechanical ventilation, associated with high mortality. The unregulated inflammation in the lungs, poor oxygenation and pulmonary infiltrates characterizing severe Covid-19 have been considered as a type of acute respiratory distress syndrome (ARDS).[1, 2]

Prior to the Covid-19 pandemic, studies have indicated that inhaled corticosteroids may reduce the risk of ARDS. In a randomized controlled trial including 61 patients at risk of ARDS, none of the patients assigned to aerosolized budesonide/formoterol vs 7 assigned to placebo developed ARDS,[3] and 6 (20%) and 16 (53%) of the patients, respectively, received mechanical ventilation. In another trial including 60 patients with acute lung injury or ARDS, nebulized budesonide improved oxygenation and peak and plateau airway pressures, and reduced inflammatory markers.[4] Moreover, potentially protective and preventive effects of inhaled corticosteroids for ARDS is supported by animals models of lung injury,[5-8] and *in vitro* studies,[9] and it has been speculated that local administration of the drug in the lung may maximize therapeutic benefits with fewer systemic side effects, as compared with systemic steroids.[3]

Therefore, it could be hypothesized that inhaled corticosteroids may be beneficial for patients with severe Covid-19. The hypothesis is further supported by reports that inhaled corticosteroids reduce the epithelial expression of genes linked to SARS-CoV-2 entry into host cells.[10, 11] Among the inhaled corticosteroids, ciclesonide has been identified as a particularly promising treatment as it can suppress replication of SARS-CoV-2 *in vitro*.[12, 13]

1  
2  
3 While previous randomized controlled trials have assessed the effects of inhaled  
4 budesonide[14, 15] or ciclesonide[16, 17] in non-hospitalized Covid-19 patients, no  
5  
6  
7 study has been performed in hospitalized patients with more severe Covid-19.  
8  
9

10 This open-label randomized controlled trial investigated the effects of inhaled  
11  
12  
13 ciclesonide, compared to standard care, in adult patients hospitalized with Covid-19  
14  
15  
16 and requiring oxygen therapy.  
17  
18  
19  
20

## 21 **Methods**

### 22 *Study design*

23  
24  
25  
26  
27  
28 The HALT Covid-19 (inHALation of ciclesonide for Treatment of Covid-19) trial was a  
29  
30  
31 multicenter, open-label randomized controlled trial to assess the efficacy and safety  
32  
33  
34 of inhaled ciclesonide for the treatment of hospitalized patients with Covid-19  
35  
36  
37 receiving oxygen therapy. The trial was conducted at 9 hospitals (3 academic  
38  
39  
40 hospitals and 6 non-academic hospitals) in Sweden between June 1, 2020, and May  
41  
42  
43  
44  
45  
46  
47  
48  
49  
50  
51  
52  
53  
54  
55  
56  
57  
58  
59  
60  
17, 2021.

All participants provided written informed consent. The study was approved by the  
Swedish Ethical Review Authority (Ethics committee number 2020-02183) and the  
Swedish Medical Products Agency (Eudra-CT number 2020-001928-34) and  
registered at [clinicaltrials.gov](http://clinicaltrials.gov) (NCT04381364).

### *Protocol changes and rationale*

1  
2  
3  
4  
5 The trial was designed in the beginning of the Covid-19 pandemic. After trial initiation,  
6 treatments for, and hospitalization rates of, patients with Covid-19 changed rapidly.  
7  
8 Therefore, we made protocol changes (described in detail in the Online Appendix)  
9  
10 and the trial was stopped early.  
11  
12  
13  
14  
15  
16

17 In brief, we increased the number of study centers, removed the upper age limit ( $\leq 85$   
18 years) for patient inclusion, changed the inclusion criteria from  $\leq 48$  hours since  
19 hospital admission to  $\leq 48$  hours from initiation of oxygen therapy and allowed for  
20 patients to be included on the basis of a positive antigen test for SARS-Cov-2. All  
21 changes were approved by the Data Monitoring Committee, Ethical Review Authority  
22 and the Swedish Medical Products Agency and implemented from December 2020.  
23  
24  
25  
26  
27  
28  
29  
30  
31  
32

33 In June 2021, 99 patients had been included in the study, a large and increasing  
34 proportion of the adult Swedish population had received Covid-19 vaccination and  
35 hospitalizations for Covid-19 had dropped substantially. We determined that it was  
36 unlikely that the intended sample size would be reached and asked the Data  
37 Monitoring Committee to convene for a meeting. Following the recommendation of  
38 the Data Monitoring Committee, the study was terminated for futility to meet the  
39 targeted enrolment.  
40  
41  
42  
43  
44  
45  
46  
47  
48  
49  
50  
51  
52

### 53 *Participants*

54  
55

56 Based on observations from Covid-19 patients treated at the study centers, we  
57 expected that 85% of the standard care group would survive and terminate oxygen  
58  
59  
60

1  
2  
3 therapy within 30 days (median 8 days). We considered a 25% (2 days) reduction in  
4 the duration of oxygen therapy to be a clinically meaningful effect. We estimated that  
5 such an effect could be detected with  $\alpha$  of 0.05, and 80% power if 446 participants  
6 (223 in each group) were enrolled.  
7  
8  
9  
10  
11  
12  
13  
14

15 Participants were eligible for inclusion if, they (1) were aged  $\geq 18$  years, (2) had a  
16 polymerase chain reaction confirmed SARS-CoV-2 infection or a positive SARS-CoV-  
17 2 antigen test from the upper respiratory tract, (3) were hospitalized at any of the  
18 study hospitals and (4) were receiving oxygen therapy, initiated within 48 hours  
19 before inclusion. Key exclusion criteria were ongoing treatment with inhaled or oral  
20 corticosteroids (previous use was accepted), oxygen therapy with  $>8$  L oxygen/min or  
21  $>50$  % oxygen on nasal high-flow cannula, and ongoing or expected intensive care or  
22 palliative care (Online Appendix).  
23  
24  
25  
26  
27  
28  
29  
30  
31  
32  
33  
34  
35

### 36 *Randomization*

37  
38 Patients were randomized 1:1 in blocks of 8, stratified by sex and hospital to receive  
39 ciclesonide or standard care. The randomization sequence was prepared by a  
40 statistician not involved in the trial. Treatment allocation was provided through a web-  
41 based interface. The participants and the physicians treating them were unblinded to  
42 the treatment assignment.  
43  
44  
45  
46  
47  
48  
49  
50  
51

### 52 *Intervention*

53  
54  
55 The treatment was 320  $\mu\text{g}$  of inhaled ciclesonide (80  $\mu\text{g}$  per actuation, for a total of 4  
56 actuations, or 160  $\mu\text{g}$  per actuation, for a total of 2 actuations) twice daily (total daily  
57 dose 640  $\mu\text{g}$ ) for 14 days. Ciclesonide was administered using a spacer (L'espace,  
58  
59  
60

1  
2  
3 Nordic Infucare, Stockholm Sweden). Participants randomized to ciclesonide  
4  
5 received written instructions, including pictures, and practical instructions on how to  
6  
7 use the inhalator and spacer; the first dose was taken under supervision. Ciclesonide  
8  
9 was then prescribed in the participant's electronic medical record and each given  
10  
11 dose during the hospitalization was recorded. Participants discharged before day 14  
12  
13 were instructed to continue the treatment at home for a total treatment duration of 14  
14  
15 days. Participants randomized to standard care did not receive any intervention  
16  
17 related to the study. Physicians treating the participants were not given any  
18  
19 restrictions concerning treatments during the study period. Participants who had been  
20  
21 discharged were contacted by telephone after day 30 for a follow-up interview.  
22  
23  
24  
25  
26  
27  
28

### 29 *Outcomes*

30  
31  
32 The primary outcome was duration of oxygen therapy (time to termination of oxygen  
33  
34 therapy in days) up to 30 days from randomization. Oxygen therapy was defined as  
35  
36 terminated on the day after which the patient did not receive oxygen therapy during  
37  
38 at least 48 hours, while being alive. This outcome corresponded to clinical  
39  
40 improvement for patients receiving oxygen therapy according to the World Health  
41  
42 Organization clinical progression scale.[18]  
43  
44  
45  
46  
47  
48

49 The key secondary outcome was a composite of invasive mechanical ventilation and  
50  
51 death up to 30 days after randomization. Other secondary outcomes were each  
52  
53 component of the key secondary outcome, admission to an intensive care unit,  
54  
55 discharge from the hospital and dyspnea in daily living at 30-35 days after  
56  
57 randomization as evaluated by the mMRC (Modified Medical Research Council)  
58  
59  
60

1  
2  
3 dyspnea scale. The scale ranges from 0 to 4 with a higher score indicating more  
4  
5 severe dyspnea.[19, 20]  
6  
7  
8  
9

10 Data on serious adverse events[21] were collected by review of electronic medical  
11 records. Information about non-serious adverse events associated with ciclesonide  
12 use (dryness of mouth, nausea and oral candidiasis) was reported using a paper-  
13 based reporting form which was filled in by the treating physician. Information about  
14 non-serious adverse events occurring after hospital discharge was collected during  
15 the follow-up interview.  
16  
17  
18  
19  
20  
21  
22  
23  
24  
25

### 26 *Data collection*

27  
28  
29  
30 Patient characteristics at baseline (comorbidities, comedications, clinical parameters)  
31 and study outcomes were obtained from electronic medical records. Investigators  
32 contacted participants after day 30 after randomization to ask them about non-  
33 serious adverse events and dyspnea in daily living (study outcome) at day 30-35 after  
34 randomization.  
35  
36  
37  
38  
39  
40  
41  
42  
43  
44

### 45 *Statistical analysis*

46  
47  
48 According to the pre-specified analysis plan in the study protocol, the analyses were  
49 performed by an investigator who had not been involved in the enrolment of  
50 participants and was blinded to treatment assignment. An intention-to-treat  
51 population was used. In the analysis of the duration of oxygen therapy, participants  
52 were followed from randomization to termination of oxygen therapy, death, or 30 days  
53 after randomization. Kaplan Meier cumulative incidence curves were generated to  
54  
55  
56  
57  
58  
59  
60



1  
2  
3 illustrate the cumulative incidence of termination of oxygen therapy in the ciclesonide  
4 and standard care groups. A Cox proportional hazard regression model, adjusted for  
5  
6 study hospital (Appendix Table 1), age (continuous variable) and sex was used to  
7  
8 estimate hazard ratios (HR) with 95% CI for time-to-event outcomes. Proportions and  
9  
10 the absolute risk difference with 95% CI were presented for binary outcomes.  
11  
12

13  
14 Subgroup analyses were performed for the primary outcome by sex, age (<70 years  
15 and ≥70 years) and duration of Covid-19 symptoms (<10 days and ≥10 days). In a  
16  
17 per-protocol analysis of the primary outcome, participants assigned to ciclesonide  
18  
19 were censored at the time of discontinuing treatment. The median mMRC score was  
20  
21 compared using the Kruskal-Wallis test. A logistic regression model adjusted for  
22  
23 study hospital, age and sex was used to compare the likelihood of reporting a mMRC  
24  
25 score of 0 (dyspnea only with strenuous exercise).  
26  
27  
28  
29  
30  
31  
32  
33

34 95% CIs of ratios not including 1 and 95% CIs for absolute risk differences not  
35  
36 including 0 were considered statistically significant. Secondary outcome analyses  
37  
38 and subgroup analyses were considered hypothesis-generating and no adjustment  
39  
40 for multiple testing was made. Analyses were performed using Stata version 16.1  
41  
42 (StataCorp).  
43  
44  
45  
46  
47  
48  
49

#### 50 *Patient and Public involvement*

51  
52 No patients were involved in setting the research question, nor in the design,  
53  
54 conduct, or interpretation of the study.  
55  
56  
57  
58  
59  
60

## Results

Of the 99 participants who underwent randomization 48 were assigned to receive ciclesonide and 51 to standard care (Figure 1). One participant in the standard care group withdrew consent and was excluded from the analysis. Ninety-eight patients (48 in the ciclesonide group and 50 in the standard care group) were included in the final analysis. All participants assigned to ciclesonide received the treatment at least once. None of the participants were lost to follow-up. The median age of participants was 59.5 (IQR 49, 67) years, 68% were men and the median duration of symptoms was 9 (IQR 8, 11) days. There were no relevant between-group differences in demographic characteristics, laboratory test results or comorbidities at enrollment (Table 1).

**Table 1** Demographic and clinical characteristics of participants at study enrolment.

|                                                      | <b>Total (n=98)</b> | <b>Ciclesonide (n=48)</b> | <b>Standard care (n=50)</b> |
|------------------------------------------------------|---------------------|---------------------------|-----------------------------|
| Age, median (IQR)                                    | 59.5 (49, 67)       | 61 (49, 67)               | 59 (49, 67)                 |
| Age ≥70 years, n (%)                                 | 78 (80)             | 37 (77)                   | 41 (82)                     |
| Men, n (%)                                           | 67 (68)             | 34 (71)                   | 33 (66)                     |
| Days since symptom onset, median (IQR)               | 9 (8, 11)           | 9 (7.5, 11.5)             | 10 (8, 11)                  |
| Days since symptom onset: <10 days, n (%)            | 51 (52)             | 27 (56)                   | 24 (48)                     |
| Body mass index in kg/m <sup>2</sup> , median (IQR)  | 29.7 (25.6, 34.0)   | 28.7 (25.4, 34.0)         | 30.6 (26.8, 34.3)           |
| Oxygen flow of oxygen therapy in L/min, median (IQR) | 2 (1, 3)            | 2 (1, 3)                  | 2 (1, 2)                    |
| Respiratory rate per minute, median (IQR)            | 20 (18, 24)         | 20 (19, 25)               | 20 (18, 23)                 |
| C-reactive protein in mg/L, median (IQR)             | 100 (56, 142)       | 103 (62, 164)             | 91.5 (45.5, 124.5)          |
| White cell count in x 10 <sup>9</sup> /L, median IQR | 5.7 (4.5, 7.0)      | 5.3 (4.3, 6.9)            | 6.1 (4.9, 7.0)              |

|                                                  |               |               |             |
|--------------------------------------------------|---------------|---------------|-------------|
| eGFR in mL/min/1.73m <sup>2</sup> , median (IQR) | 83 (70.5, 90) | 81.5 (70, 90) | 87 (73, 90) |
| <b>Coexisting conditions, n (%)</b>              |               |               |             |
| Diabetes mellitus                                | 18 (18)       | 8 (17)        | 10 (20)     |
| Hypertension <sup>a</sup>                        | 45 (46)       | 22 (46)       | 23 (46)     |
| Hyperlipidemia <sup>b</sup>                      | 27 (28)       | 12 (25)       | 15 (30)     |
| Chronic obstructive lung disease                 | 3 (3)         | 1 (2)         | 2 (4)       |
| Asthma                                           | 8 (8)         | 6 (13)        | 2 (4)       |
| Current smoker                                   | 12 (12)       | 6 (13)        | 6 (12)      |
| Ischemic heart disease                           | 8 (8)         | 2 (4)         | 6 (12)      |
| Heart failure                                    | 3 (3)         | 2 (4)         | 1 (2)       |
| Atrial fibrillation                              | 5 (5)         | 3 (6)         | 2 (4)       |
| Cancer                                           | 10 (10)       | 5 (10)        | 5 (10)      |
| Chronic kidney disease                           | 9 (9)         | 5 (10)        | 4 (8)       |

<sup>a</sup> Diagnosis of hypertension or use of antihypertensive drugs

<sup>b</sup> Diagnosis of hyperlipidemia or use of lipid lowering therapy

Missing values were: n=1 for days since symptom onset, n=20 for body mass index, n=1 for oxygen flow of oxygen therapy, n=1 for body temperature, n=1 for heart rate, n=3 for respiratory rate, n=3 for C-reactive protein, n=7 for white cell count and n=22 for eGFR.

eGFR: estimated glomerular filtration rate

The results of primary and secondary outcome analyses are presented in Table 2.

Kaplan-Meier estimates of the median duration of oxygen therapy were 5.5 (IQR 3, 9) days in the ciclesonide group and 4 (2, 7) days in the standard care group. (Figure 2).

The HR for termination of oxygen therapy during 30 days following randomization, used to compare ciclesonide vs standard care, showed that ciclesonide treatment was not statistically significantly associated with the duration of oxygen therapy (0.73 (95% CI 0.47 to 1.11)). The upper limit of the 95% CI was compatible with a maximum relative reduction[22] in duration of oxygen therapy of 10% (1-1/1.11) with

ciclesonide, which in a post-hoc calculation described in the Online Appendix, corresponded to a <1 day absolute reduction. In the per-protocol analysis, the HR for termination of oxygen therapy during 30 days following randomization was 0.79 (95% CI 0.51 to 1.23) (Table 2).

**Table 2** Outcomes. All outcomes are recorded during 30 days following randomization unless otherwise indicated.

|                                                                     | <b>Ciclesonide</b> | <b>Standard care</b> | <b>Difference<sup>a</sup></b> |
|---------------------------------------------------------------------|--------------------|----------------------|-------------------------------|
| <b>Primary outcome</b>                                              |                    |                      |                               |
| Duration of oxygen therapy, median (IQR) days                       | 5.5 (3, 9)         | 4 (2, 7)             | 0.73 (0.47 to 1.11)           |
| <b>Key secondary outcome</b>                                        |                    |                      |                               |
| Death or invasive mechanical ventilation, n (%)                     | 3 (6)              | 3 (6)                | 0 (-9 to 10)                  |
| Time to death or invasive mechanical ventilation, median (IQR) days | 2 (2, 10)          | 4 (2, 7)             | 0.90 (0.15 to 5.32)           |
| <b>Secondary outcomes</b>                                           |                    |                      |                               |
| Death, n (%)                                                        | 2 (4)              | 1 (2)                | -                             |
| Invasive mechanical ventilation, n (%)                              | 1 (2)              | 3 (6)                | -                             |
| Admission to an intensive care unit, n (%)                          | 4 (8)              | 4 (8)                | -                             |
| mMRC dyspnea scale score at day 30-35, median (IQR) <sup>b</sup>    | 3 (2, 4)           | 3 (2, 4)             | 0.97                          |
| mMRC dyspnea scale score 0 at day 30-35, n (%) <sup>b</sup>         | 4 (9)              | 7 (15)               | 0.48 (0.11 to 2.04)           |
| <b>Subgroup analyses<sup>c</sup></b>                                |                    |                      |                               |
| <i>Sex: Men</i>                                                     |                    |                      |                               |
| Duration of oxygen therapy, median (IQR) days                       | 5.5 (3, 9)         | 5 (2, 7)             | 0.61 (0.36 to 1.05)           |
| <i>Sex: Women</i>                                                   |                    |                      |                               |
| Duration of oxygen therapy, median (IQR) days                       | 5.5 (2, 7)         | 4 (2, 8)             | 0.91 (0.41 to 2.01)           |
| <i>Age group: &lt;70 years</i>                                      |                    |                      |                               |
| Duration of oxygen therapy, median (IQR) days                       | 5 (3, 7)           | 4 (2, 7)             | 0.77 (0.48 to 1.23)           |
| <i>Age group: ≥70 years</i>                                         |                    |                      |                               |
| Duration of oxygen therapy, median (IQR) days                       | 9 (5, 10)          | 6 (5, 8)             | 0.37 (p=0.266 <sup>d</sup> )  |
| <i>Days since symptom onset: &lt;10 days</i>                        |                    |                      |                               |

|                                               |           |          |                     |
|-----------------------------------------------|-----------|----------|---------------------|
| Duration of oxygen therapy, median (IQR) days | 7 (3, 10) | 4 (2, 5) | 0.54 (0.28 to 1.03) |
| <i>Days since symptom onset: ≥10 days</i>     |           |          |                     |
| Duration of oxygen therapy, median (IQR) days | 5 (3, 6)  | 5 (3, 8) | 0.97 (0.48 to 1.94) |
| <b>Per protocol analysis<sup>e</sup></b>      |           |          |                     |
| Duration of oxygen therapy, median (IQR) days | 5 (3, 9)  | 4 (2, 7) | 0.79 (0.51 to 1.23) |

<sup>a</sup>. Differences are expressed as hazard ratios (95% CI) estimated using a Cox proportional hazards model for time to event outcomes and as absolute risk difference (95% CI) in percent for outcomes of absolute risk. The comparison of the mMRC dyspnea score was done using the Kruskal-Wallis test and the difference is expressed as a p-value. The comparison of the likelihood of reporting a mMRC score of 0 was done using a logistic regression model and the difference is expressed as an odds ratio (95% CI). Statistical testing for differences in proportions and time-to-event analyses were not performed for the secondary outcome events, including death, invasive mechanical ventilation, and admission to an intensive care unit due to few events.

<sup>b</sup>. Not including 1 participant in the standard care group and 2 participants in the ciclesonide group who died within 30 days of randomization and 1 participant in the standard care group and 1 participant in the ciclesonide group with missing data on this outcome.

<sup>c</sup>. The subgroup analyses included n=33 in the standard care group and n=34 in the ciclesonide group for men, n=17 in the standard care group and n=14 in the ciclesonide group for women, n=41 in the standard care group and n=37 in the ciclesonide group for those aged <70 years, n=9 in the standard care group and n=11 in the ciclesonide group for those aged ≥70 years, n=24 in the standard care group and n=27 in the ciclesonide group for those with <10 days since symptom onset, and n=25 in the standard care group and n=21 in the ciclesonide group for those with ≥10 days since symptom onset. 1 participant had missing data on days since symptom onset and was not included in the subgroup analysis.

<sup>d</sup>. 95% CI were not calculated due to low sample size. The p-value is calculated using the Mann-Whitney U Test for duration of oxygen therapy after exclusion 1 patients in the standard care group and 2 patient in the ciclesonide group who died or received invasive mechanical intervention during 30 days after randomization. The use of the Mann-Whitney U Test was a post-hoc decision and the analysis could not be adjusted for age, sex and study hospital.

<sup>e</sup>. In the per-protocol analysis for duration of oxygen therapy, patients assigned to ciclesonide were censored at the time of discontinuing treatment.

1  
2  
3 In total, 3 (6%) participants assigned to ciclesonide and 3 (6%) participants assigned  
4 to standard care experienced the key secondary outcome of mechanical invasive  
5 ventilation or death (absolute difference 0% (95% CI -10 to 9%; HR 0.90 (95% CI  
6 0.15 to 5.32)). Median mMRC dyspnea score at 30-35 days after randomization was  
7 3 (IQR 2, 4) in both groups (p-value for difference 0.97) (Table 2).  
8  
9  
10  
11  
12  
13  
14  
15  
16

17 There were no statistically significant differences between those assigned to  
18 ciclesonide vs standard care in the primary outcome in any of the subgroup analyses  
19 by sex, age (<70 years and ≥70 years) and days since symptom onset (<10 days and  
20 ≥10 days) (Table 2).  
21  
22  
23  
24  
25  
26  
27  
28  
29

30 There were no apparent differences between the groups in treatments that  
31 participants received after randomization (Table 3); 26 (54%) of the participants  
32 assigned to ciclesonide and 22 (44%) of the participants in the standard care group  
33 received treatment with systemic corticosteroids after randomization.  
34  
35  
36  
37  
38  
39  
40  
41  
42

43 Few serious adverse clinical events occurred during the study. The most frequently  
44 reported adverse event was dry mouth (7 (15%) participants in the ciclesonide group  
45 and 11 (22%) participants in the standard care group). Two participants assigned to  
46 ciclesonide and 0 in the placebo group reported that they experienced oral  
47 candidiasis (Table 3).  
48  
49  
50  
51  
52  
53  
54  
55  
56

57 **Table 3** Participants' treatments and adverse clinical events through day 30 after  
58 randomization.  
59  
60

|                                          | <b>Ciclesonide</b><br>(n=48) | <b>Standard care</b><br>(n=50) |
|------------------------------------------|------------------------------|--------------------------------|
| <b>Received treatment, n (%)</b>         |                              |                                |
| Systemic corticosteroids                 | 26 (54)                      | 22 (44)                        |
| Remdesivir                               | 4 (8)                        | 5 (10)                         |
| Low-molecular-weight heparin             | 45 (94)                      | 45 (90)                        |
| Oral anticoagulants                      | 32 (67)                      | 30 (60)                        |
| Vasopressors                             | 4 (8)                        | 3 (6)                          |
| Non-invasive mechanical ventilation      | 8 (17)                       | 7 (14)                         |
| <b>Serious clinical events, n (%)</b>    |                              |                                |
| Renal failure                            | 2 (4)                        | 3 (6)                          |
| Cardiac arrest                           | 1 (2)                        | 0 (0)                          |
| New onset atrial fibrillation            | 0 (0)                        | 1 (2)                          |
| Pulmonary embolism                       | 4 (8)                        | 2 (4)                          |
| Other thromboembolic events              | 0 (0)                        | 1 (2)                          |
| Sepsis                                   | 3 (6)                        | 2 (4)                          |
| Other serious event                      | 1 (2)                        | 0 (0)                          |
| <b>Non-serious adverse events, n (%)</b> |                              |                                |
| Nausea                                   | 6 (13)                       | 8 (16)                         |
| Dry mouth                                | 7 (15)                       | 11 (22)                        |
| Oral candidiasis                         | 2 (4)                        | 0 (0)                          |
| Other non-serious adverse event          | 3 (6)                        | 1 (2)                          |

Some pre-

specified analyses were not performed due to small sample size or low number of events. These included statistical testing of differences in proportions and time-to-event analyses for non-key secondary outcomes, including death, invasive mechanical ventilation, and admission to an intensive care unit; the secondary outcome analyses of discharge from hospital; subgroup analyses for the secondary

1  
2  
3 outcomes, and the primary outcome analysis after exclusion of participants who  
4  
5 received invasive mechanical ventilation or died.  
6  
7  
8  
9

## 10 **Discussion**

11  
12  
13  
14  
15 In this randomized open-label, controlled trial, including 98 hospitalized Covid-19  
16  
17 patients with ongoing oxygen therapy, treatment with inhaled ciclesonide did not  
18  
19 result in a statistically significant reduction in the duration of oxygen therapy, used as  
20  
21 a measure of time to clinical improvement. The trial ruled out, with 0.95 confidence,  
22  
23 treatments effects of ciclesonide corresponding to more than a one-day reduction in  
24  
25 duration of oxygen therapy.  
26  
27  
28  
29  
30

31  
32 While previous randomized controlled trials have assessed effects of inhaled  
33  
34 corticosteroids, including budesonide[14, 15] and ciclesonide[16, 17], in non-  
35  
36 hospitalized patients with Covid-19, this is the first trial that includes hospitalized  
37  
38 patients with more severe forms of the disease. In contrast to our hypothesis, the  
39  
40 median duration of oxygen therapy was nominally longer among patients assigned to  
41  
42 ciclesonide vs standard care (5.5 vs 4 days; HR for termination of oxygen therapy  
43  
44 0.73 (95% CI 0.47 to 1.11)). As such, the 95% CI indicates that,[22] even in the best  
45  
46 case, ciclesonide may reduce the duration of oxygen therapy with only 10% (1-  
47  
48 1/1.11; less than 1 day in our study) while it may in the worst case result in an over 2-  
49  
50 fold increase. Thus, the results of this trial indicate that ciclesonide is unlikely to  
51  
52 provide a clinically meaningful beneficial effect on the duration of oxygen therapy in  
53  
54 hospitalized Covid-19 patients receiving oxygen therapy.  
55  
56  
57  
58  
59  
60



1  
2  
3 To date, 2 randomized controlled trials of ciclesonide in non-hospitalized patients with  
4 Covid-19 have been presented. In the CONTAIN study,[16] which was terminated  
5  
6  
7  
8 early due to slow recruitment, 215 non-hospitalized patients with a median of 3 days  
9  
10  
11  
12 symptom duration were randomized to combination treatment with intranasal and  
13  
14  
15 inhaled ciclesonide or placebo. No statistically significant difference between the  
16  
17  
18 groups was observed for the primary endpoint, resolution of respiratory symptoms at  
19  
20  
21 day 7 after randomization, which was reached by 40% of the patients in the treatment  
22  
23  
24 group vs 35% in the placebo group (adjusted risk difference of 5.5% (95% CI -7.8%  
25  
26  
27 to 18.8%).[16] Six (6%) patients assigned to ciclesonide vs 3 (3%) in the placebo  
28  
29  
30 group were hospitalized within 14 days; none died. In another clinical trial of  
31  
32  
33 ciclesonide, including 400 non-hospitalized patients with Covid-19,[17] randomization  
34  
35  
36 to ciclesonid vs placebo did not result in a reduced time to alleviation of all Covid-19  
37  
38  
39 related symptoms. However, in secondary outcome analyses, patients assigned to  
40  
41  
42 ciclesonide had fewer emergency department visits or hospital admissions for  
43  
44  
45 reasons related to COVID-19 (odds ratio, 0.18, 95% CI, 0.04 to 0.85).

46  
47  
48 In addition, 2 randomized clinical trials of the inhaled corticosteroid budesonide in  
49  
50  
51 non-hospitalized patients with Covid-19 have been presented. The STOIC trial was  
52  
53  
54 an open-label trial comparing inhaled budesonide vs standard care in 146 Covid-19  
55  
56  
57 patients with mild symptoms.[14] Compared to standard care, budesonide treatment  
58  
59  
60 led to a statistically significant reduction in Covid-19-related emergency department  
assessment and hospitalization (difference in proportions 0.123 (95% CI 0.043 to  
0.218).[14] Furthermore, budesonide treatment was associated with 1 day shorter  
time to clinical recovery. The PRINCIPLE trial was another open-label trial that  
included 4700 primary care patients at high risk of developing severe Covid-19 (1073

1  
2  
3 randomized to budesonide treatment; 1988 to standard care; 1639 to other  
4  
5 treatments).[15] Compared to standard care, randomization to budesonide led to a  
6  
7 shorter time to self-reported recovery (difference 2.94 days (95% Bayesian credible  
8  
9 interval 1.19 to 5.12) and a reduced likelihood of hospital admission or death,  
10  
11 although the results for the latter outcomes did not meet the superiority threshold.  
12  
13  
14  
15  
16

17 Taken together, the previous studies indicate that inhaled corticosteroids might be  
18  
19 useful for preventing deterioration of Covid-19 in non-hospitalized patients with mild  
20  
21 symptoms. It is possible that the low likelihood of benefit associated with ciclesonide  
22  
23 treatment observed in our study reflects the more severe pulmonary inflammation in  
24  
25 our study population, as indicated by the need for hospitalization with oxygen therapy  
26  
27 and a median symptom duration of 9 days: at such stages of disease progression, it  
28  
29 could be speculated that pulmonary administration of corticosteroids may not suffice  
30  
31 to confer benefit and that systemic treatment is needed. Accordingly, in the Recovery  
32  
33 trial of hospitalized Covid-19 patients,[23] dexamethasone treatment reduced risk of  
34  
35 death and the time to discharge from hospital, with these benefits primarily being  
36  
37 observed among patients receiving oxygen therapy or invasive mechanical ventilation  
38  
39 at baseline.  
40  
41  
42  
43  
44  
45  
46

47 Similar to other clinical trials including patients with Covid-19,[15, 23, 24] we used a  
48  
49 pragmatic, open-label design. With this design, we intended to assess the effect of  
50  
51 adding ciclesonide to standard care, rather than to examine the effect of ciclesonide  
52  
53 compared to placebo. The research question that our study aimed to answer was  
54  
55 “what is the effect of using ciclesonide as an addition to standard care as compared  
56  
57 with standard care alone?” While this is a research question of relevance to clinical  
58  
59  
60

1  
2  
3 decision-making, the open-label design and the possible expectations of effect  
4  
5 among both patients[25] and physicians might have affected the outcomes in our  
6  
7 study, including when to terminate oxygen therapy. Another limitation of our study is  
8  
9 that we were unable to recruit the intended number of patients due to the substantial  
10  
11 decrease in hospitalized Covid-19 patients in Sweden during 2021. Importantly, the  
12  
13 study could not provide much information regarding the key secondary outcome of  
14  
15 death or invasive mechanical intervention. Further research in hospitalized Covid-19  
16  
17 patients is needed to determine the potential effect of ciclesonide treatment on these  
18  
19 outcomes. Moreover, it is a possibility that effects of ciclesonide differ as compared to  
20  
21 other inhaled corticosteroids (e.g., budesonide). Patients were instructed to use  
22  
23 ciclesonide without a spacer after discharge from the hospital; this may have affected  
24  
25 drug delivery. Finally, results from the Recovery Trial were released 5 weeks after the  
26  
27 initiation of our study and around half of the patients in both the ciclesonide group  
28  
29 and the control group received systemic corticosteroids after randomization. Further  
30  
31 studies would be needed to assess the comparative effectiveness and safety of  
32  
33 ciclesonide vs systemic corticosteroids.  
34  
35  
36  
37  
38  
39  
40  
41

## 42 **Conclusions**

43  
44  
45 In this open-label randomized controlled trial in patients hospitalized with Covid-19  
46  
47 and receiving oxygen therapy, the findings indicated that treatment with ciclesonide  
48  
49 vs standard care is unlikely to result in a clinically meaningful reduction in the  
50  
51 duration of oxygen therapy.  
52  
53  
54  
55  
56  
57

## 58 **Acknowledgements**

1  
2  
3 We would like to thank the following individuals that did not qualify for authorship but  
4 contributed to the study: Dr Oscar Bakhouch (Skaraborg Hospital), Dr Eva-Marie  
5 Boman and Dr Anders Lundqvist (Southern Älvsborg Hospital).  
6  
7  
8  
9  
10  
11  
12

### 13 **Contributorship statement**

14  
15  
16  
17 DB, PU, PT, OB and DPA conceived the study and were responsible for the  
18 methods. OB and DPA were responsible for the study conduct. DB, PU, OB and DPA  
19 were responsible for the financing. PT validated the data. PU performed the main  
20 analysis. DPA, PU and PT wrote the original draft of the manuscript. All authors  
21 wrote, reviewed, and edited the manuscript. OB and DPA supervised the study. DB,  
22 DPA, PU, PT and OB were responsible for administration of the project. DPA and OB  
23 are the guarantors. DB, PT, AK, EW, SA, SW, OE, AN, AE, JG, JEK, BJ, JL, JLI, JH,  
24 OB and DPA enrolled participants in the study. The corresponding author attests that  
25 all listed authors meet authorship criteria and that no others meeting the criteria have  
26 been omitted.  
27  
28  
29  
30  
31  
32  
33  
34  
35  
36  
37  
38  
39  
40  
41  
42

### 43 **Competing interests**

44  
45 This study received non-financial support from COVIS Pharma (study drug donation).  
46  
47 The authors have no conflict of interest to disclose.  
48  
49  
50  
51

### 52 **Funding/Support**

53  
54  
55 This study was funded by the Swedish Heart and Lung Foundation (Number  
56 20200421), The Axel and Margaret Ax:son Johnson Foundation (N/A), CIMED (N/A),  
57 and Strategic Research Program at Karolinska Institutet (Number 961507), the  
58  
59  
60

1  
2  
3 Stockholm County Council (Number: 954970, 963296, 962029), and the  
4  
5 Västmanland County Council (Grant nr LTV-938409). PU was supported by grants  
6  
7 from the Strategic Research Program in Epidemiology at Karolinska Institutet (N/A),  
8  
9 and a Faculty Funded Career Position at Karolinska Institutet (N/A).  
10  
11  
12

13 The funders had no role in the study design, conduct, collection, management,  
14  
15 analysis, interpretation of data, writing or reviewing the manuscript or decision to  
16  
17 submit the manuscript for publication. The study drug was donated by COVIS  
18  
19 Pharma but COVIS pharma did not participate in any other part of the study.  
20  
21  
22

### 23 24 **Data sharing statement**

25  
26 Data are available upon reasonable request  
27  
28  
29  
30

### 31 32 **Ethics Approval**

33 All participants provided written informed consent. The study was approved by the  
34  
35 Swedish Ethical Review Authority (Ethics committee number 2020-02183) and the  
36  
37 Swedish Medical Products Agency (Eudra-CT number 2020-001928-34) and  
38  
39 registered at clinicaltrials.gov (NCT04381364).  
40  
41  
42  
43  
44

### 45 46 **References**

47  
48 1. Gibson PG, Qin L, Pua SH. COVID-19 acute respiratory  
49  
50 distress syndrome (ARDS): clinical features and differences  
51  
52 from typical pre-COVID-19 ARDS. *Med J Aust* 2020; 213:54-6  
53  
54 e1.  
55  
56  
57  
58  
59  
60

- 1  
2  
3  
4 2. Bos LDJ. COVID-19-related Acute Respiratory Distress  
5  
6 Syndrome: Not So Atypical. *Am J Respir Crit Care Med* **2020**;  
7  
8 202:622-4.  
9
- 10  
11 3. Festic E, Carr GE, Cartin-Ceba R, et al. Randomized Clinical  
12  
13 Trial of a Combination of an Inhaled Corticosteroid and Beta  
14  
15 Agonist in Patients at Risk of Developing the Acute Respiratory  
16  
17 Distress Syndrome. *Crit Care Med* **2017**; 45:798-805.  
18
- 19  
20 4. Mohamed HS, Meguid MM. Effect of nebulized budesonide  
21  
22 on respiratory mechanics and oxygenation in acute lung  
23  
24 injury/acute respiratory distress syndrome: Randomized  
25  
26 controlled study. *Saudi J Anaesth* **2017**; 11:9-14.  
27
- 28  
29 5. Jansson AH, Eriksson C, Wang X. Effects of budesonide and  
30  
31 N-acetylcysteine on acute lung hyperinflation, inflammation and  
32  
33 injury in rats. *Vascul Pharmacol* **2005**; 43:101-11.  
34
- 35  
36 6. Forsgren PE, Modig JA, Dahlback CM, Axelsson BI.  
37  
38 Prophylactic treatment with an aerosolized corticosteroid  
39  
40 liposome in a porcine model of early ARDS induced by  
41  
42 endotoxaemia. *Acta Chir Scand* **1990**; 156:423-31.  
43
- 44  
45 7. Wang J, Zhang L, Walther SM. Administration of aerosolized  
46  
47 terbutaline and budesonide reduces chlorine gas-induced acute  
48  
49 lung injury. *J Trauma* **2004**; 56:850-62.  
50
- 51  
52 8. Walther S, Jansson I, Berg S, Lennquist S. Pulmonary  
53  
54 granulocyte accumulation is reduced by nebulized corticosteroid  
55  
56 in septic pigs. *Acta Anaesthesiol Scand* **1992**; 36:651-5.  
57  
58  
59  
60

- 1  
2  
3  
4 9. Yamaya M, Nishimura H, Deng X, et al. Inhibitory effects of  
5 glycopyrronium, formoterol, and budesonide on coronavirus  
6 HCoV-229E replication and cytokine production by primary  
7 cultures of human nasal and tracheal epithelial cells. *Respir*  
8 *Investig* 2020; 58:155-68.
- 9  
10  
11  
12  
13  
14  
15 10. Peters MC, Sajuthi S, Deford P, et al. COVID-19-related  
16 Genes in Sputum Cells in Asthma. Relationship to Demographic  
17 Features and Corticosteroids. *Am J Respir Crit Care Med* 2020;  
18 202:83-90.
- 19  
20  
21  
22  
23  
24  
25 11. Milne S, Li X, Yang CX, et al. Inhaled corticosteroids  
26 downregulate SARS-CoV-2-related genes in COPD: results  
27 from a randomised controlled trial. *Eur Respir J* 2021; 58.
- 28  
29  
30  
31  
32 12. Jeon S, Ko M, Lee J, et al. Identification of Antiviral Drug  
33 Candidates against SARS-CoV-2 from FDA-Approved Drugs.  
34 *Antimicrob Agents Chemother* 2020; 64.
- 35  
36  
37  
38  
39 13. Kimura H, Kurusu H, Sada M, et al. Molecular  
40 pharmacology of ciclesonide against SARS-CoV-2. *J Allergy*  
41 *Clin Immunol* 2020; 146:330-1.
- 42  
43  
44  
45  
46 14. Ramakrishnan S, Nicolau DV, Jr., Langford B, et al. Inhaled  
47 budesonide in the treatment of early COVID-19 (STOIC): a  
48 phase 2, open-label, randomised controlled trial. *Lancet Respir*  
49 *Med* 2021; 9:763-72.
- 50  
51  
52  
53  
54 15. Yu LM, Bafadhel M, Dorward J, et al. Inhaled budesonide  
55 for COVID-19 in people at high risk of complications in the  
56  
57  
58  
59  
60

1  
2  
3  
4 community in the UK (PRINCIPLE): a randomised, controlled,  
5 open-label, adaptive platform trial. *Lancet* **2021**; 398:843-55.

6  
7  
8 16. Ezer N, Belga S, Daneman N, et al. Inhaled and intranasal  
9 ciclesonide for the treatment of covid-19 in adult outpatients:  
10 CONTAIN phase II randomised controlled trial. *BMJ* **2021**;  
11 375:e068060.  
12

13  
14  
15 17. Clemency BM, Varughese R, Gonzalez-Rojas Y, et al.  
16 Efficacy of Inhaled Ciclesonide for Outpatient Treatment of  
17 Adolescents and Adults With Symptomatic COVID-19: A  
18 Randomized Clinical Trial. *JAMA Intern Med* **2021**.  
19

20  
21  
22 18. Characterisation WHOWGotC, Management of C-i. A  
23 minimal common outcome measure set for COVID-19 clinical  
24 research. *Lancet Infect Dis* **2020**; 20:e192-e7.  
25

26  
27 19. Mahler DA, Wells CK. Evaluation of clinical methods for  
28 rating dyspnea. *Chest* **1988**; 93:580-6.  
29

30  
31  
32 20. Bestall JC, Paul EA, Garrod R, Garnham R, Jones PW,  
33 Wedzicha JA. Usefulness of the Medical Research Council  
34 (MRC) dyspnoea scale as a measure of disability in patients  
35 with chronic obstructive pulmonary disease. *Thorax* **1999**;  
36 54:581-6.  
37

38  
39 21. Directive 2001/20/EC of the European Parliament and of the  
40 Council of 4 April 2001 on the approximation of the laws,  
41 regulations and administrative provisions of the member states  
42 relating to the implementation of good clinical practice in the  
43  
44  
45  
46  
47  
48  
49  
50  
51  
52  
53  
54  
55  
56  
57  
58  
59  
60



1  
2  
3  
4 conduct of clinical trials on medicinal products for human use.

5  
6 Med Etika Bioet **2002**; 9:12-9.

7  
8 22. Hawkins AT, Samuels LR. Use of Confidence Intervals in  
9  
10 Interpreting Nonstatistically Significant Results. JAMA **2021**;  
11  
12 326:2068-9.

13  
14 23. Group RC, Horby P, Lim WS, et al. Dexamethasone in  
15  
16 Hospitalized Patients with Covid-19. N Engl J Med **2021**;  
17  
18 384:693-704.

19  
20 24. Investigators R-C, Gordon AC, Mouncey PR, et al.  
21  
22 Interleukin-6 Receptor Antagonists in Critically Ill Patients with  
23  
24 Covid-19. N Engl J Med **2021**; 384:1491-502.

25  
26 25. Wechsler ME, Kelley JM, Boyd IO, et al. Active albuterol or  
27  
28 placebo, sham acupuncture, or no intervention in asthma. N  
29  
30 Engl J Med **2011**; 365:119-26.  
31  
32  
33  
34  
35  
36  
37  
38  
39  
40  
41  
42  
43  
44  
45  
46  
47  
48  
49  
50  
51  
52  
53  
54  
55  
56  
57  
58  
59  
60

1  
2  
3 **Figure 1** Flow diagram for study participants.  
4

5 **Figure 2** Time to termination of oxygen therapy during 30 days after randomization.  
6  
7  
8  
9  
10  
11  
12  
13  
14  
15  
16  
17  
18  
19  
20  
21  
22  
23  
24  
25  
26  
27  
28  
29  
30  
31  
32  
33  
34  
35  
36  
37  
38  
39  
40  
41  
42  
43  
44  
45  
46  
47  
48  
49  
50  
51  
52  
53  
54  
55  
56  
57  
58  
59  
60

For peer review only

1  
2  
3  
4  
5  
6  
7  
8  
9  
10  
11  
12  
13  
14  
15  
16  
17  
18  
19  
20  
21  
22  
23  
24  
25  
26  
27  
28  
29  
30  
31  
32  
33  
34  
35  
36  
37  
38  
39  
40  
41  
**Figure 1**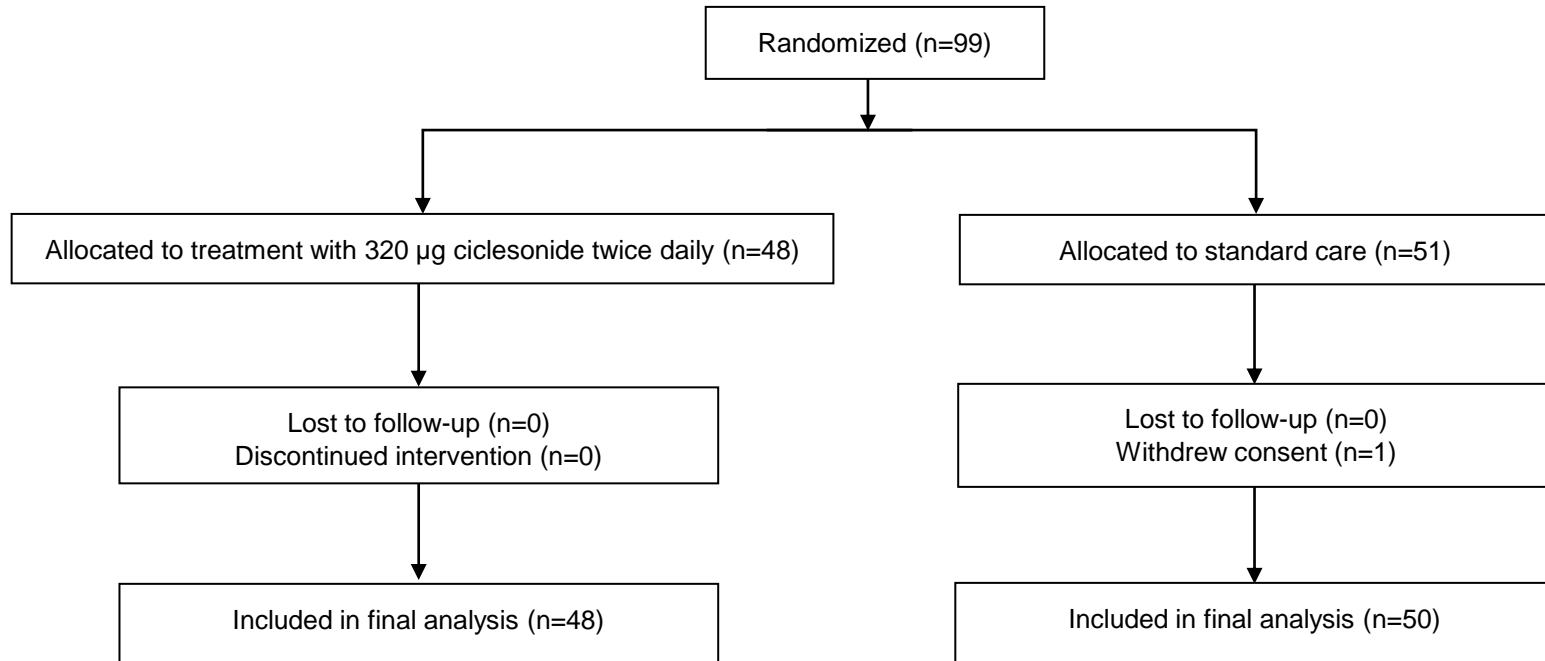

**Figure 2** Time to termination of oxygen therapy.

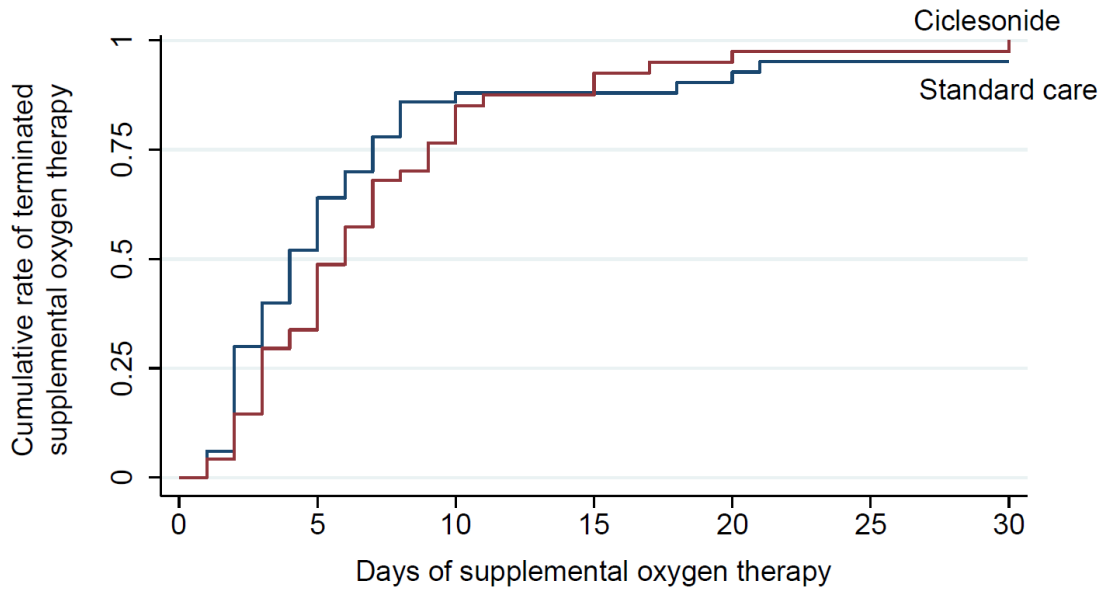

| No at risk    |    |    |    |   |   |   |   |  |
|---------------|----|----|----|---|---|---|---|--|
| Standard care | 50 | 24 | 7  | 6 | 4 | 2 | 2 |  |
| Ciclesonide   | 48 | 31 | 11 | 5 | 2 | 1 | 1 |  |

ew only

**ONLINE APPENDIX**

Brodin D, Tornhammar P, Ueda P, Krifors A, Westerlund E, Athlin S, Wojt S, Elvstam O, Neumann A, Elshani A, Giesecke J, Edvardsson J, Bunpuckdee S, Unge C, Larsson M, Johansson B, Ljungberg J, Lindell J, Hansson J, Blennow O, Andersson DP. Inhaled Ciclesonide in Adults Hospitalized with Covid-19: a Randomized Controlled Open-label Trial (HALT Covid-19).

For peer review only

## Protocol changes and rationale

The trial was designed in the beginning of the covid-19 pandemic when data from randomized clinical trials of Covid-19 treatment were scarce. After trial initiation, treatments for patients with Covid-19 and hospitalization rates of such patients changed rapidly. Therefore, we made changes to the protocol and the trial was stopped early.

5 weeks after the start of patient inclusion in our study, in July 2020, the Recovery Collaborative group presented preliminary data<sup>1</sup> showing protective effects of dexamethasone treatment in patients hospitalized for covid-19; a subgroup analysis of this study indicated that the effect was driven by patients receiving invasive mechanical ventilation or oxygen therapy. These data, in combination with local experience from treating patients with Covid-19,<sup>2</sup> led to most patients receiving oxygen therapy with  $\geq 4$  L oxygen/min at the study hospitals being treated with systemic corticosteroids. As use of systemic corticosteroids was an exclusion criterion, the change in practice made a large proportion of the Covid-19 patients ineligible for participation.

Initially the trial was conducted at 4 hospitals. To increase the inclusion rate, 9 additional hospitals were included as study sites, although only 5 of them ended up recruiting patients to the study. We also removed the previous upper age limit of 85 years for inclusion and allowed for inclusion of patients based on a positive antigen test for SARS-CoV-2. Moreover, because some patients may start receiving oxygen therapy before hospital admission (e.g., at nursing homes before being transported

1  
2  
3 to the hospital) or a period after hospital admission (e.g., if the patient's condition  
4 deteriorated) and we aimed to include patients shortly after initiation of such therapy,  
5  
6 we changed the inclusion criteria from hospitalization within 48 hours prior to  
7  
8 enrollment to initiation of oxygen therapy no longer than 48 hours prior to enrollment.  
9  
10  
11  
12  
13

14 All changes were approved by the Data Monitoring Committee, Ethical Review  
15 Authority and the Swedish Medical Products Agency and implemented from  
16  
17 December 2020.  
18  
19  
20  
21  
22  
23

24 In June 2021, when 99 patients had been included in the study, a large and  
25 increasing proportion of the adult Swedish population had received vaccination for  
26  
27 Covid-19. The number of patients hospitalized with Covid-19 had dropped  
28  
29 substantially and there were none to only a few Covid-19 patients admitted to the  
30  
31 study hospitals per week. We determined that it was unlikely that we would reach the  
32  
33 intended sample size and asked the Data Monitoring Committee to convene for a  
34  
35 meeting. Following the recommendation of the Data Monitoring Committee, the study  
36  
37 was terminated early due to expected futility to meet total enrolment.  
38  
39  
40  
41  
42  
43  
44  
45  
46  
47  
48  
49  
50  
51  
52  
53  
54  
55  
56  
57  
58  
59  
60

### Inclusion and exclusion criteria<sup>a</sup>

Participants were eligible for inclusion if, at the time of study inclusion, they (1) were aged  $\geq 18$  years, (2) had a polymerase chain reaction confirmed SARS-CoV-2 infection or a positive antigen test for SARS-CoV-2, (3) were hospitalized at any of the study hospitals and (4) were receiving oxygen therapy with not more than 48 hours having passed since initiation of this treatment.

Patients were not eligible for inclusion if they (1) had a history of hypersensitivity to ciclesonide or other substances included in the treatment, (2) received ongoing treatment with inhaled or oral corticosteroids, ketokonazol, itrakonazol, ritonavir or nelfinavir, (3) received  $>8$  L oxygen/min or  $>50$  % oxygen with nasal high-flow therapy, (4) were receiving or under consideration for palliative care or had an expected survival of less than 72 h, (5) were expected to be admitted to an intensive care unit within 48 h, (6) had active or inactive pulmonary tuberculosis, severe liver failure (Child-Pugh C), pulmonary arterial hypertension or fibrosis, cognitive or physical impairment, (7) had insufficient language skills to understand information given about the study, (8) had been included in a clinical trial within 30 days, or (9) were women and pregnant, breastfeeding or did not agree to take highly effective contraceptive measures while receiving treatment plus an additional 7 days.

<sup>a</sup> The presentation of these inclusion and exclusion criteria have been modified for readability as compared with the version presented in the study protocol.



## Post-hoc calculation for interpretation of the 95% confidence interval in the primary outcome analysis

The research question that we aimed to assess was whether inhaled ciclesonide, as compared with standard care, could reduce the time to clinical improvement (as indicated by duration of oxygen therapy). While the interpretation of statistically non-significant findings is a recurring and well-known subject of debate in the medical literature, it is generally not recommended to use a binary interpretation based on an arbitrary cut-off for statistical significance<sup>3-6</sup>. This is particularly important in this trial as it was terminated early and thereby underpowered to assess its primary outcome. However, it has been suggested that in trials with statistically non-significant findings, the 95% CIs should be used to rule in or rule out potential effect sizes of the intervention. In this study, we therefore assessed the largest benefit of ciclesonide that was compatible with the confidence interval. Such a benefit was represented by the upper limit of the HR for time to termination of oxygen therapy (a higher HR indicates shorter duration of oxygen therapy for the ciclesonide group), i.e., 1.11. We took the inverse of this HR ( $1/1.11 = 0.90$ ) to calculate the relative reduction in duration of oxygen therapy that the HR was compatible with (i.e.,  $1-0.90 = 10\%$  relative reduction). We then multiplied this 10% relative reduction with the absolute duration of oxygen therapy in the standard care group to calculate the corresponding absolute difference in duration of oxygen therapy ( $10\% * 4 \text{ days} = 0.4 \text{ days}$ , which is  $<1$  day). Given the pre-specified minimally clinically important difference of 2 days (which was used for the power calculation of the study), we deemed this best-case difference to be clinically irrelevant.

**Appendix table 1** Number of participants included in the final study population by study center.

| <i>Study center</i>                     | <i>n participants</i> |
|-----------------------------------------|-----------------------|
| Danderyd Hospital                       | 26                    |
| Capio S:t Görän Hospital                | 24                    |
| Karolinska University Hospital          | 21                    |
| Västmanland County Hospital             | 13                    |
| Örebro University Hospital <sup>a</sup> | 6                     |
| Växjö Central Hospital <sup>a</sup>     | 3                     |
| Halland County Hospital <sup>a</sup>    | 2                     |
| Östersund Hospital <sup>a</sup>         | 2                     |
| Visby Hospital <sup>a</sup>             | 1                     |

<sup>a</sup> In the analyses adjusted for study center, these hospitals were categorized into one group.

## References

1. Group RC, Horby P, Lim WS, et al. Dexamethasone in Hospitalized Patients with Covid-19. *N Engl J Med* 2021;384(8):693-704. doi: 10.1056/NEJMoa2021436 [published Online First: 2020/07/18]
2. Kan B, Ahl M, Blennow O, et al. *Lakartidningen* 2020;117 [published Online First: 2020/10/07]
3. Altman DG, Bland JM. Absence of evidence is not evidence of absence. *BMJ* 1995;311(7003):485. doi: 10.1136/bmj.311.7003.485 [published Online First: 1995/08/19]
4. Harrell F. Statistical Errors in the Medical Literature. *Statistical Thinking*. <https://www.fharrell.com/post/errmed/index.html> (accessed Oct 24, 2022). 2017.
5. Hawkins AT, Samuels LR. Use of Confidence Intervals in Interpreting Nonstatistically Significant Results. *JAMA* 2021;326(20):2068-69. doi: 10.1001/jama.2021.16172 [published Online First: 2021/11/24]
6. Greenland S, Senn SJ, Rothman KJ, et al. Statistical tests, P values, confidence intervals, and power: a guide to misinterpretations. *Eur J Epidemiol* 2016;31(4):337-50. doi: 10.1007/s10654-016-0149-3 [published Online First: 2016/05/23]

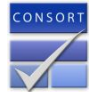

## CONSORT 2010 checklist of information to include when reporting a randomised trial\*

| Section/Topic                    | Item No | Checklist item                                                                                                                                                                              | Reported on page No |
|----------------------------------|---------|---------------------------------------------------------------------------------------------------------------------------------------------------------------------------------------------|---------------------|
| <b>Title and abstract</b>        |         |                                                                                                                                                                                             |                     |
|                                  | 1a      | Identification as a randomised trial in the title                                                                                                                                           | 1                   |
|                                  | 1b      | Structured summary of trial design, methods, results, and conclusions (for specific guidance see CONSORT for abstracts)                                                                     | 3                   |
| <b>Introduction</b>              |         |                                                                                                                                                                                             |                     |
| Background and objectives        | 2a      | Scientific background and explanation of rationale                                                                                                                                          | 5,6                 |
|                                  | 2b      | Specific objectives or hypotheses                                                                                                                                                           | 5-7                 |
| <b>Methods</b>                   |         |                                                                                                                                                                                             |                     |
| Trial design                     | 3a      | Description of trial design (such as parallel, factorial) including allocation ratio                                                                                                        | 6-9                 |
|                                  | 3b      | Important changes to methods after trial commencement (such as eligibility criteria), with reasons                                                                                          | 6,7,9               |
| Participants                     | 4a      | Eligibility criteria for participants                                                                                                                                                       | 7,8                 |
|                                  | 4b      | Settings and locations where the data were collected                                                                                                                                        | 6,7                 |
| Interventions                    | 5       | The interventions for each group with sufficient details to allow replication, including how and when they were actually administered                                                       | 6-11                |
| Outcomes                         | 6a      | Completely defined pre-specified primary and secondary outcome measures, including how and when they were assessed                                                                          | 9-11                |
|                                  | 6b      | Any changes to trial outcomes after the trial commenced, with reasons                                                                                                                       | 6,7                 |
| Sample size                      | 7a      | How sample size was determined                                                                                                                                                              | 6-9                 |
|                                  | 7b      | When applicable, explanation of any interim analyses and stopping guidelines                                                                                                                | 6,7                 |
| <b>Randomisation:</b>            |         |                                                                                                                                                                                             |                     |
| Sequence generation              | 8a      | Method used to generate the random allocation sequence                                                                                                                                      | 8                   |
|                                  | 8b      | Type of randomisation; details of any restriction (such as blocking and block size)                                                                                                         | 8                   |
| Allocation concealment mechanism | 9       | Mechanism used to implement the random allocation sequence (such as sequentially numbered containers), describing any steps taken to conceal the sequence until interventions were assigned | 8                   |
| Implementation                   | 10      | Who generated the random allocation sequence, who enrolled participants, and who assigned participants to interventions                                                                     | 8                   |
| Blinding                         | 11a     | If done, who was blinded after assignment to interventions (for example, participants, care providers, those                                                                                | 8,11                |

|                                                      |     |                                                                                                                                                   |       |
|------------------------------------------------------|-----|---------------------------------------------------------------------------------------------------------------------------------------------------|-------|
|                                                      |     | assessing outcomes) and how                                                                                                                       |       |
|                                                      | 11b | If relevant, description of the similarity of interventions                                                                                       | -     |
| Statistical methods                                  | 12a | Statistical methods used to compare groups for primary and secondary outcomes                                                                     | 10,11 |
|                                                      | 12b | Methods for additional analyses, such as subgroup analyses and adjusted analyses                                                                  | 10,11 |
| <b>Results</b>                                       |     |                                                                                                                                                   |       |
| Participant flow (a diagram is strongly recommended) | 13a | For each group, the numbers of participants who were randomly assigned, received intended treatment, and were analysed for the primary outcome    | 11-13 |
|                                                      | 13b | For each group, losses and exclusions after randomisation, together with reasons                                                                  | 11-13 |
| Recruitment                                          | 14a | Dates defining the periods of recruitment and follow-up                                                                                           | 6,7   |
|                                                      | 14b | Why the trial ended or was stopped                                                                                                                | 7     |
| Baseline data                                        | 15  | A table showing baseline demographic and clinical characteristics for each group                                                                  | Yes   |
| Numbers analysed                                     | 16  | For each group, number of participants (denominator) included in each analysis and whether the analysis was by original assigned groups           | Yes   |
| Outcomes and estimation                              | 17a | For each primary and secondary outcome, results for each group, and the estimated effect size and its precision (such as 95% confidence interval) | Yes   |
|                                                      | 17b | For binary outcomes, presentation of both absolute and relative effect sizes is recommended                                                       | -     |
| Ancillary analyses                                   | 18  | Results of any other analyses performed, including subgroup analyses and adjusted analyses, distinguishing pre-specified from exploratory         | 10,11 |
| Harms                                                | 19  | All important harms or unintended effects in each group (for specific guidance see CONSORT for harms)                                             | 13    |
| <b>Discussion</b>                                    |     |                                                                                                                                                   |       |
| Limitations                                          | 20  | Trial limitations, addressing sources of potential bias, imprecision, and, if relevant, multiplicity of analyses                                  | 13-17 |
| Generalisability                                     | 21  | Generalisability (external validity, applicability) of the trial findings                                                                         | 13-17 |
| Interpretation                                       | 22  | Interpretation consistent with results, balancing benefits and harms, and considering other relevant evidence                                     | 13-17 |
| <b>Other information</b>                             |     |                                                                                                                                                   |       |
| Registration                                         | 23  | Registration number and name of trial registry                                                                                                    | 6     |
| Protocol                                             | 24  | Where the full trial protocol can be accessed, if available                                                                                       | -     |
| Funding                                              | 25  | Sources of funding and other support (such as supply of drugs), role of funders                                                                   | 18,19 |

\*We strongly recommend reading this statement in conjunction with the CONSORT 2010 Explanation and Elaboration for important clarifications on all the items. If relevant, we also recommend reading CONSORT extensions for cluster randomised trials, non-inferiority and equivalence trials, non-pharmacological treatments, herbal interventions, and pragmatic trials. Additional extensions are forthcoming: for those and for up to date references relevant to this checklist, see [www.consort-statement.org](http://www.consort-statement.org).

# BMJ Open

## Inhaled Ciclesonide in Adults Hospitalized with Covid-19: a Randomized Controlled Open-label Trial (HALT Covid-19)

|                                 |                                                                                                                                                                                                                                                                                                                                                                                                                                                                                                                                                                                                                                                                                                                                                                                                                                                                                                                                                                                                                                                                                                                                                                                                                                                                                                                                                                                                                                                                                                                                    |
|---------------------------------|------------------------------------------------------------------------------------------------------------------------------------------------------------------------------------------------------------------------------------------------------------------------------------------------------------------------------------------------------------------------------------------------------------------------------------------------------------------------------------------------------------------------------------------------------------------------------------------------------------------------------------------------------------------------------------------------------------------------------------------------------------------------------------------------------------------------------------------------------------------------------------------------------------------------------------------------------------------------------------------------------------------------------------------------------------------------------------------------------------------------------------------------------------------------------------------------------------------------------------------------------------------------------------------------------------------------------------------------------------------------------------------------------------------------------------------------------------------------------------------------------------------------------------|
| Journal:                        | <i>BMJ Open</i>                                                                                                                                                                                                                                                                                                                                                                                                                                                                                                                                                                                                                                                                                                                                                                                                                                                                                                                                                                                                                                                                                                                                                                                                                                                                                                                                                                                                                                                                                                                    |
| Manuscript ID                   | bmjopen-2022-064374.R2                                                                                                                                                                                                                                                                                                                                                                                                                                                                                                                                                                                                                                                                                                                                                                                                                                                                                                                                                                                                                                                                                                                                                                                                                                                                                                                                                                                                                                                                                                             |
| Article Type:                   | Original research                                                                                                                                                                                                                                                                                                                                                                                                                                                                                                                                                                                                                                                                                                                                                                                                                                                                                                                                                                                                                                                                                                                                                                                                                                                                                                                                                                                                                                                                                                                  |
| Date Submitted by the Author:   | 10-Jan-2023                                                                                                                                                                                                                                                                                                                                                                                                                                                                                                                                                                                                                                                                                                                                                                                                                                                                                                                                                                                                                                                                                                                                                                                                                                                                                                                                                                                                                                                                                                                        |
| Complete List of Authors:       | <p>Brodin, Daniel; Capio Sankt Görans Sjukhus<br/> Tornhammar, Per; Karolinska Institute, Functional Area of Emergency Medicine<br/> Ueda, Peter; Karolinska Institutet<br/> Krifors, Anders; Karolinska Institutet, Department of Physiology and Pharmacology; Västmanlands sjukhus Västerås<br/> Westerlund, Eli; Danderyd University Hospital, Department of Clinical Sciences<br/> Athlin, Simon; Örebro University<br/> Wojt, Sandra; Danderyd University Hospital, Department of Internal Medicine<br/> Elvstam, Olof; Central Hospital Växjö, Department of Infectious Diseases<br/> Neumann, Anca; Capio Sankt Görans Sjukhus<br/> Elshani, Arsim; Karlskoga Hospital<br/> Giesecke, Julia; Karolinska Universitetssjukhuset<br/> Edvardsson-Källkvist, Jens; Karolinska University Hospital<br/> Bunpuckdee, Sayam; Karolinska Institutet<br/> Unge, Christian; Danderyd University Hospital, Department of Internal Medicine<br/> Larsson, Martin; Karolinska Institutet Department of Clinical Science and Education Sodersjukhuset<br/> Johansson, Björn; Halland County<br/> Ljungberg, Johan; Halland County<br/> Lindell, Jonas; Visby Hospital, Department of Infectious Diseases<br/> Hansson, Johan; Östersund Hospital, Department of Infectious Diseases<br/> Blennow, Ola; Karolinska University Hospital, Department of Infectious Diseases<br/> Andersson, Daniel Peter; Karolinska University Hospital, Department of Medicine Huddinge H7, Karolinska Institutet; Karolinska Institute, Medicine (H7)</p> |
| <b>Primary Subject Heading</b>: | Infectious diseases                                                                                                                                                                                                                                                                                                                                                                                                                                                                                                                                                                                                                                                                                                                                                                                                                                                                                                                                                                                                                                                                                                                                                                                                                                                                                                                                                                                                                                                                                                                |
| Secondary Subject Heading:      | Respiratory medicine                                                                                                                                                                                                                                                                                                                                                                                                                                                                                                                                                                                                                                                                                                                                                                                                                                                                                                                                                                                                                                                                                                                                                                                                                                                                                                                                                                                                                                                                                                               |
| Keywords:                       | COVID-19, Clinical trials < THERAPEUTICS, Respiratory infections < THORACIC MEDICINE                                                                                                                                                                                                                                                                                                                                                                                                                                                                                                                                                                                                                                                                                                                                                                                                                                                                                                                                                                                                                                                                                                                                                                                                                                                                                                                                                                                                                                               |
|                                 |                                                                                                                                                                                                                                                                                                                                                                                                                                                                                                                                                                                                                                                                                                                                                                                                                                                                                                                                                                                                                                                                                                                                                                                                                                                                                                                                                                                                                                                                                                                                    |

1  
2  
3  
4  
5  
6  
7  
8  
9  
10  
11  
12  
13  
14  
15  
16  
17  
18  
19  
20  
21  
22  
23  
24  
25  
26  
27  
28  
29  
30  
31  
32  
33  
34  
35  
36  
37  
38  
39  
40  
41  
42  
43  
44  
45  
46  
47  
48  
49  
50  
51  
52  
53  
54  
55  
56  
57  
58  
59  
60





I, the Submitting Author has the right to grant and does grant on behalf of all authors of the Work (as defined in the below author licence), an exclusive licence and/or a non-exclusive licence for contributions from authors who are: i) UK Crown employees; ii) where BMJ has agreed a CC-BY licence shall apply, and/or iii) in accordance with the terms applicable for US Federal Government officers or employees acting as part of their official duties; on a worldwide, perpetual, irrevocable, royalty-free basis to BMJ Publishing Group Ltd ("BMJ") its licensees and where the relevant Journal is co-owned by BMJ to the co-owners of the Journal, to publish the Work in this journal and any other BMJ products and to exploit all rights, as set out in our [licence](#).

The Submitting Author accepts and understands that any supply made under these terms is made by BMJ to the Submitting Author unless you are acting as an employee on behalf of your employer or a postgraduate student of an affiliated institution which is paying any applicable article publishing charge ("APC") for Open Access articles. Where the Submitting Author wishes to make the Work available on an Open Access basis (and intends to pay the relevant APC), the terms of reuse of such Open Access shall be governed by a Creative Commons licence – details of these licences and which [Creative Commons](#) licence will apply to this Work are set out in our licence referred to above.

Other than as permitted in any relevant BMJ Author's Self Archiving Policies, I confirm this Work has not been accepted for publication elsewhere, is not being considered for publication elsewhere and does not duplicate material already published. I confirm all authors consent to publication of this Work and authorise the granting of this licence.



# Inhaled Ciclesonide in Adults Hospitalized with Covid-19: a Randomized Controlled Open-label Trial (HALT Covid-19)

Daniel Brodin<sup>1\*</sup>, MD; Per Tornhammar<sup>2,3\*</sup>, MD; Peter Ueda<sup>4\*\*</sup>, MD, PhD; Anders Krifors<sup>5,6</sup> MD; Eli Westerlund<sup>7</sup>, MD, PhD; Simon Athlin<sup>8</sup>, MD, PhD; Sandra Wojt<sup>9</sup>, MD; Olof Elvstam<sup>10</sup>, MD, PhD; Anca Neumann<sup>1</sup>, MD; Arsim Elshani<sup>11</sup>, MD; Julia Giesecke<sup>3</sup> MD; Jens Edvardsson-Källkvist<sup>3</sup>, MD; Sayam Bunpuckdee<sup>12</sup>, MD student; Christian Unge<sup>9</sup>, MD, PhD; Martin Larsson<sup>13,14</sup>, MD, PhD; Björn Johansson<sup>15</sup>, MD; Johan Ljungberg<sup>15</sup>, MD; Jonas Lindell<sup>16</sup>, MD; Johan Hansson<sup>17</sup>, MD, PhD; Ola Blennow<sup>1,3,18#</sup>, MD, PhD, Daniel P Andersson<sup>3,13#</sup> MD, PhD

\*Equal contributions

#Equal contributions

\*\*Corresponding author

## Correspondence

Ola Blennow MD, PhD Address: Department of Infectious Diseases, Karolinska University Hospital, Huddinge, 14141 Stockholm Sweden

Email: [ola.blennow@regionstockholm.se](mailto:ola.blennow@regionstockholm.se)

Phone: +46739813617

## Affiliations:

<sup>1</sup> Department of Internal Medicine, Capio St Göran's Hospital, Stockholm, Sweden

<sup>2</sup> Functional Area of Emergency Medicine, Karolinska University Hospital Huddinge, Stockholm, Sweden

1  
2  
3 <sup>3</sup> Department of Medicine (H7), Karolinska Institutet, Karolinska University Hospital,  
4  
5 Huddinge, 141 86 Stockholm, Sweden  
6

7 <sup>4</sup> Clinical Epidemiology Division, Department of Medicine Solna, Karolinska Institutet,  
8  
9 Stockholm, Sweden  
10

11 <sup>5</sup> Department of Physiology and Pharmacology, Karolinska Institutet, Stockholm,  
12  
13 Sweden.  
14

15 <sup>6</sup> Centre for Clinical Research Västmanland, Uppsala University, Västmanland  
16  
17 County Hospital, Västerås, Sweden.  
18

19 <sup>7</sup> Department of Clinical Sciences, Karolinska Institutet, Danderyd Hospital,  
20  
21 Stockholm, Sweden  
22

23 <sup>8</sup> School of Medical Sciences, Faculty of Medicine, Örebro University, Örebro,  
24  
25 Sweden  
26

27 <sup>9</sup> Department of Internal Medicine, Danderyd Hospital, Stockholm, Sweden  
28

29 <sup>10</sup> Department of Infectious Diseases, Växjö Central Hospital, Växjö, Sweden  
30

31 <sup>11</sup> Department in Geriatric Medicine at Karlskoga Hospital, Karlskoga, Sweden  
32

33 <sup>12</sup> At the time of the study: Department of Medicine (H7), Karolinska Institutet,  
34  
35 Stockholm, Sweden  
36

37 <sup>13</sup> Department of Endocrinology, Karolinska University Hospital, Stockholm, Sweden  
38

39 <sup>14</sup> Department of Molecular Medicine and Surgery (K1), Karolinska Institutet,  
40  
41 Stockholm, Sweden  
42

43 <sup>15</sup> Department of Infectious Diseases Halland County Hospital Halmstad, Halmstad,  
44  
45 Sweden  
46

47 <sup>16</sup> Department of Infectious Diseases, Visby Hospital, Visby, Sweden  
48

49 <sup>17</sup> Department of Infectious Diseases, Östersund Hospital, Östersund, Sweden  
50  
51  
52  
53  
54  
55  
56  
57  
58  
59  
60

1  
2  
3 <sup>18</sup> Department of Infectious Diseases, Karolinska University Hospital, Stockholm,  
4  
5 Sweden

6  
7  
8 Word count: 3286  
9

10  
11 Abstract word count: 250  
12  
13  
14  
15  
16  
17  
18  
19  
20  
21  
22  
23  
24  
25  
26  
27  
28  
29  
30  
31  
32  
33  
34  
35  
36  
37  
38  
39  
40  
41  
42  
43  
44  
45  
46  
47  
48  
49  
50  
51  
52  
53  
54  
55  
56  
57  
58  
59  
60

For peer review only

## Abstract

**Objective:** To assess the efficacy of inhaled ciclesonide in reducing the duration of oxygen therapy (an indicator of time to clinical improvement) among adults hospitalized with Covid-19.

**Design:** Multicenter, randomized, controlled, open-label trial.

**Setting:** 9 hospitals (3 academic hospitals and 6 non-academic hospitals) in Sweden between June 1, 2020, and May 17, 2021.

**Participants:** Adults hospitalized with Covid-19 and receiving oxygen therapy.

**Intervention:** Inhaled ciclesonide 320 µg twice daily for 14 days versus standard care.

**Main outcome measures:** Primary outcome was duration of oxygen therapy, an indicator of time to clinical improvement. Key secondary outcome was a composite of invasive mechanical ventilation/death.

**Results:** Data from 98 participants were analyzed (48 receiving ciclesonide and 50 receiving standard care; median (IQR) age, 59.5 (49-67) years; 67 (68%) male). Median (IQR) duration of oxygen therapy was 5.5 (3-9) days in the ciclesonide group and 4 (2-7) days in the standard care group (hazard ratio (HR) for termination of oxygen therapy 0.73 (95% CI 0.47-1.11), with the upper 95% CI being compatible with a 10% relative reduction in oxygen therapy duration, corresponding to a <1-day absolute reduction in a post-hoc calculation). Three participants in each group died/received invasive mechanical ventilation (HR 0.90 (95% CI 0.15-5.32)). The trial was discontinued early due to slow enrollment.

1  
2  
3 **Conclusions:** In hospitalized Covid-19 patients receiving oxygen therapy, this trial  
4 ruled out, with 0.95 confidence, a treatment effect of ciclesonide corresponding to  
5 more than a one-day reduction in duration of oxygen therapy. Ciclesonide is unlikely  
6 to improve this outcome meaningfully.  
7  
8  
9  
10  
11  
12  
13  
14  
15

### 16 **Strengths and limitations of this study**

- 17 • This was a multicenter, randomized, controlled, open-label trial comparing  
18 treatment with the inhaled corticosteroid ciclesonide 320 µg twice daily for 14  
19 days versus standard care.  
20
- 21 • Healthcare providers and participants were not blinded to treatment  
22 assignment.  
23
- 24 • The trial was terminated early due to slow recruitment.  
25  
26  
27  
28  
29  
30  
31  
32  
33  
34  
35  
36  
37  
38  
39  
40  
41  
42  
43  
44  
45  
46  
47  
48  
49  
50  
51  
52  
53  
54  
55  
56  
57  
58  
59  
60

## Introduction

Patients with Covid-19 can develop acute respiratory failure that may require invasive mechanical ventilation, associated with high mortality. The unregulated inflammation in the lungs, poor oxygenation and pulmonary infiltrates characterizing severe Covid-19 have been considered as a type of acute respiratory distress syndrome (ARDS).<sup>1 2</sup>

Prior to the Covid-19 pandemic, studies have indicated that inhaled corticosteroids may reduce the risk of ARDS. In a randomized controlled trial including 61 patients at risk of ARDS, none of the patients assigned to aerosolized budesonide/formoterol vs 7 assigned to placebo developed ARDS,<sup>3</sup> and 6 (20%) and 16 (53%) of the patients, respectively, received mechanical ventilation. In another trial including 60 patients with acute lung injury or ARDS, nebulized budesonide improved oxygenation and peak and plateau airway pressures, and reduced inflammatory markers.<sup>4</sup> Moreover, potentially protective and preventive effects of inhaled corticosteroids for ARDS is supported by animals models of lung injury,<sup>5-8</sup> and *in vitro* studies,<sup>9</sup> and it has been speculated that local administration of the drug in the lung may maximize therapeutic benefits with fewer systemic side effects, as compared with systemic steroids.<sup>3</sup>

Therefore, it could be hypothesized that inhaled corticosteroids may be beneficial for patients with severe Covid-19. The hypothesis is further supported by reports that inhaled corticosteroids reduce the epithelial expression of genes linked to SARS-CoV-2 entry into host cells.<sup>10 11</sup> Among the inhaled corticosteroids, ciclesonide has been identified as a particularly promising treatment as it can suppress replication of SARS-CoV-2 *in vitro*.<sup>12 13</sup>

1  
2  
3 While previous randomized controlled trials have assessed the effects of inhaled  
4  
5 budesonide<sup>14 15</sup> or ciclesonide<sup>16 17</sup> in non-hospitalized Covid-19 patients, no study  
6  
7 has been performed in hospitalized patients with more severe Covid-19.  
8  
9

10 This open-label randomized controlled trial investigated the effects of inhaled  
11  
12 ciclesonide, compared to standard care, in adult patients hospitalized with Covid-19  
13  
14 and requiring oxygen therapy.  
15  
16

## 21 **Methods**

### 24 *Study design*

25  
26  
27  
28 The HALT Covid-19 (inHALation of ciclesonide for Treatment of Covid-19) trial was a  
29  
30 multicenter, open-label randomized controlled trial to assess the efficacy and safety  
31  
32 of inhaled ciclesonide for the treatment of hospitalized patients with Covid-19  
33  
34 receiving oxygen therapy. The trial was conducted at 9 hospitals (3 academic  
35  
36 hospitals and 6 non-academic hospitals) in Sweden between June 1, 2020, and May  
37  
38 17, 2021.  
39  
40  
41  
42  
43

44 All participants provided written informed consent. The study was approved by the  
45  
46 Swedish Ethical Review Authority (Ethics committee number 2020-02183) and the  
47  
48 Swedish Medical Products Agency (Eudra-CT number 2020-001928-34) and  
49  
50 registered at [clinicaltrials.gov](https://clinicaltrials.gov) (NCT04381364).  
51  
52  
53

### 56 *Protocol changes and rationale*

57  
58  
59  
60

1  
2  
3  
4  
5 The trial was designed in the beginning of the Covid-19 pandemic. After trial initiation,  
6 treatments for, and hospitalization rates of, patients with Covid-19 changed rapidly.  
7  
8 Therefore, we made protocol changes (described in detail in the Online Appendix)  
9  
10 and the trial was stopped early.  
11  
12  
13  
14  
15  
16

17 In brief, we increased the number of study centers, removed the upper age limit ( $\leq 85$   
18 years) for patient inclusion, changed the inclusion criteria from  $\leq 48$  hours since  
19 hospital admission to  $\leq 48$  hours from initiation of oxygen therapy and allowed for  
20 patients to be included on the basis of a positive antigen test for SARS-Cov-2. All  
21 changes were approved by the Data Monitoring Committee, Ethical Review Authority  
22 and the Swedish Medical Products Agency and implemented from December 2020.  
23  
24  
25  
26  
27  
28  
29  
30  
31  
32

33 In June 2021, 99 patients had been included in the study, a large and increasing  
34 proportion of the adult Swedish population had received Covid-19 vaccination and  
35 hospitalizations for Covid-19 had dropped substantially. We determined that it was  
36 unlikely that the intended sample size would be reached and asked the Data  
37 Monitoring Committee to convene for a meeting. Following the recommendation of  
38 the Data Monitoring Committee, the study was terminated for futility to meet the  
39 targeted enrolment.  
40  
41  
42  
43  
44  
45  
46  
47  
48  
49  
50  
51

### 52 *Participants*

53  
54  
55  
56 Based on observations from Covid-19 patients treated at the study centers, we  
57 expected that 85% of the standard care group would survive and terminate oxygen  
58  
59  
60



1  
2  
3 therapy within 30 days (median 8 days). We considered a 25% (2 days) reduction in  
4 the duration of oxygen therapy to be a clinically meaningful effect. We estimated that  
5 such an effect could be detected with  $\alpha$  of 0.05, and 80% power if 446 participants  
6 (223 in each group) were enrolled.  
7  
8  
9  
10  
11  
12  
13  
14

15 Participants were eligible for inclusion if, they (1) were aged  $\geq 18$  years, (2) had a  
16 polymerase chain reaction confirmed SARS-CoV-2 infection or a positive SARS-CoV-  
17 2 antigen test from the upper respiratory tract, (3) were hospitalized at any of the  
18 study hospitals and (4) were receiving oxygen therapy, initiated within 48 hours  
19 before inclusion. Key exclusion criteria were ongoing treatment with inhaled or oral  
20 corticosteroids (previous use was accepted), oxygen therapy with  $>8$  L oxygen/min or  
21  $>50$  % oxygen on nasal high-flow cannula, and ongoing or expected intensive care or  
22 palliative care (Online Appendix).  
23  
24  
25  
26  
27  
28  
29  
30  
31  
32  
33  
34  
35

### 36 *Randomization*

37  
38 Patients were randomized 1:1 in blocks of 8, stratified by sex and hospital to receive  
39 ciclesonide or standard care. The randomization sequence was prepared by a  
40 statistician not involved in the trial. Treatment allocation was provided through a web-  
41 based interface. The participants and the physicians treating them were unblinded to  
42 the treatment assignment.  
43  
44  
45  
46  
47  
48  
49  
50  
51

### 52 *Intervention*

53  
54  
55 The treatment was 320  $\mu\text{g}$  of inhaled ciclesonide (80  $\mu\text{g}$  per actuation, for a total of 4  
56 actuations, or 160  $\mu\text{g}$  per actuation, for a total of 2 actuations) twice daily (total daily  
57 dose 640  $\mu\text{g}$ ) for 14 days. Ciclesonide was administered using a spacer (L'espace,  
58  
59  
60

1  
2  
3 Nordic Infucare, Stockholm Sweden). Participants randomized to ciclesonide  
4  
5 received written instructions, including pictures, and practical instructions on how to  
6  
7 use the inhalator and spacer; the first dose was taken under supervision. Ciclesonide  
8  
9 was then prescribed in the participant's electronic medical record and each given  
10  
11 dose during the hospitalization was recorded. Participants discharged before day 14  
12  
13 were instructed to continue the treatment at home for a total treatment duration of 14  
14  
15 days. Participants randomized to standard care did not receive any intervention  
16  
17 related to the study. Physicians treating the participants were not given any  
18  
19 restrictions concerning treatments during the study period. Participants who had been  
20  
21 discharged were contacted by telephone after day 30 for a follow-up interview.  
22  
23  
24  
25  
26  
27  
28

### 29 *Outcomes*

30  
31  
32 The primary outcome was duration of oxygen therapy (time to termination of oxygen  
33  
34 therapy in days) up to 30 days from randomization. Oxygen therapy was defined as  
35  
36 terminated on the day after which the patient did not receive oxygen therapy during  
37  
38 at least 48 hours, while being alive. This outcome corresponded to clinical  
39  
40 improvement for patients receiving oxygen therapy according to the World Health  
41  
42 Organization clinical progression scale.<sup>18</sup>  
43  
44  
45  
46  
47

48 The key secondary outcome was a composite of invasive mechanical ventilation and  
49  
50 death up to 30 days after randomization. Other secondary outcomes were each  
51  
52 component of the key secondary outcome, admission to an intensive care unit,  
53  
54 discharge from the hospital and dyspnea in daily living at 30-35 days after  
55  
56 randomization as evaluated by the mMRC (Modified Medical Research Council)  
57  
58  
59  
60

1  
2  
3 dyspnea scale. The scale ranges from 0 to 4 with a higher score indicating more  
4  
5 severe dyspnea.<sup>19 20</sup>  
6  
7  
8  
9

10 Data on serious adverse events<sup>21</sup> were collected by review of electronic medical  
11 records. Information about non-serious adverse events associated with ciclesonide  
12 use (dryness of mouth, nausea and oral candidiasis) was reported using a paper-  
13 based reporting form which was filled in by the treating physician. Information about  
14 non-serious adverse events occurring after hospital discharge was collected during  
15 the follow-up interview.  
16  
17  
18  
19  
20  
21  
22  
23  
24  
25

### 26 *Data collection*

27  
28  
29  
30 Patient characteristics at baseline (comorbidities, comedications, clinical parameters)  
31 and study outcomes were obtained from electronic medical records. Investigators  
32 contacted participants after day 30 after randomization to ask them about non-  
33 serious adverse events and dyspnea in daily living (study outcome) at day 30-35 after  
34 randomization.  
35  
36  
37  
38  
39  
40  
41  
42  
43  
44

### 45 *Statistical analysis*

46  
47  
48 According to the pre-specified analysis plan in the study protocol, the analyses were  
49 performed by an investigator who had not been involved in the enrolment of  
50 participants and was blinded to treatment assignment. An intention-to-treat  
51 population was used. In the analysis of the duration of oxygen therapy, participants  
52 were followed from randomization to termination of oxygen therapy, death, or 30 days  
53 after randomization. Kaplan Meier cumulative incidence curves were generated to  
54  
55  
56  
57  
58  
59  
60

1  
2  
3 illustrate the cumulative incidence of termination of oxygen therapy in the ciclesonide  
4 and standard care groups. A Cox proportional hazard regression model, adjusted for  
5  
6 and standard care groups. A Cox proportional hazard regression model, adjusted for  
7  
8 study hospital (Appendix Table 1), age (continuous variable) and sex was used to  
9  
10 estimate hazard ratios (HR) with 95% CI for time-to-event outcomes. Proportions and  
11  
12 the absolute risk difference with 95% CI were presented for binary outcomes. In a  
13  
14 per-protocol analysis of the primary outcome, participants assigned to ciclesonide  
15  
16 were censored at the time of discontinuing treatment. The median mMRC score was  
17  
18 compared using the Kruskal-Wallis test. A logistic regression model adjusted for  
19  
20 study hospital, age and sex was used to compare the likelihood of reporting a mMRC  
21  
22 score of 0 (dyspnea only with strenuous exercise).  
23  
24  
25  
26  
27  
28  
29

30 In an analysis that was not pre-specified, we additionally adjusted the primary  
31  
32 outcome analysis for baseline variables, including days since symptom onset, c-  
33  
34 reactive protein and white blood count (as continuous variables), and diabetes  
35  
36 mellitus, hypertension and hyperlipidemia.  
37  
38

39 95% CIs of ratios not including 1 and 95% CIs for absolute risk differences not  
40  
41 including 0 were considered statistically significant. Secondary outcome analyses  
42  
43 were considered hypothesis-generating and no adjustment for multiple testing was  
44  
45 made. Analyses were performed using Stata version 16.1 (StataCorp).  
46  
47  
48  
49  
50  
51

### 52 *Patient and Public involvement*

53  
54  
55 No patients were involved in setting the research question, nor in the design,  
56  
57 conduct, or interpretation of the study.  
58  
59  
60

## Results

Of the 99 participants who underwent randomization 48 were assigned to receive ciclesonide and 51 to standard care (Figure 1). One participant in the standard care group withdrew consent and was excluded from the analysis. Ninety-eight patients (48 in the ciclesonide group and 50 in the standard care group) were included in the final analysis. All participants assigned to ciclesonide received the treatment at least once. None of the participants were lost to follow-up. The median age of participants was 59.5 (IQR 49, 67) years, 68% were men and the median duration of symptoms was 9 (IQR 8, 11) days. There were no relevant between-group differences in demographic characteristics, laboratory test results or comorbidities at enrollment (Table 1).

**Table 1** Demographic and clinical characteristics of participants at study enrolment.

|                                                      | <b>Total (n=98)</b> | <b>Ciclesonide (n=48)</b> | <b>Standard care (n=50)</b> |
|------------------------------------------------------|---------------------|---------------------------|-----------------------------|
| Age, median (IQR)                                    | 59.5 (49, 67)       | 61 (49, 67)               | 59 (49, 67)                 |
| Age ≥70 years, n (%)                                 | 78 (80)             | 37 (77)                   | 41 (82)                     |
| Men, n (%)                                           | 67 (68)             | 34 (71)                   | 33 (66)                     |
| Days since symptom onset, median (IQR)               | 9 (8, 11)           | 9 (7.5, 11.5)             | 10 (8, 11)                  |
| Days since symptom onset: <10 days, n (%)            | 51 (52)             | 27 (56)                   | 24 (48)                     |
| Body mass index in kg/m <sup>2</sup> , median (IQR)  | 29.7 (25.6, 34.0)   | 28.7 (25.4, 34.0)         | 30.6 (26.8, 34.3)           |
| Oxygen flow of oxygen therapy in L/min, median (IQR) | 2 (1, 3)            | 2 (1, 3)                  | 2 (1, 2)                    |
| Respiratory rate per minute, median (IQR)            | 20 (18, 24)         | 20 (19, 25)               | 20 (18, 23)                 |
| C-reactive protein in mg/L, median (IQR)             | 100 (56, 142)       | 103 (62, 164)             | 91.5 (45.5, 124.5)          |

|                                                  |                |                |                |
|--------------------------------------------------|----------------|----------------|----------------|
| White cell count in $\times 10^9/L$ , median IQR | 5.7 (4.5, 7.0) | 5.3 (4.3, 6.9) | 6.1 (4.9, 7.0) |
| eGFR in mL/min/1.73m <sup>2</sup> , median (IQR) | 83 (70.5, 90)  | 81.5 (70, 90)  | 87 (73, 90)    |
| <b>Coexisting conditions, n (%)</b>              |                |                |                |
| Diabetes mellitus                                | 18 (18)        | 8 (17)         | 10 (20)        |
| Hypertension <sup>a</sup>                        | 45 (46)        | 22 (46)        | 23 (46)        |
| Hyperlipidemia <sup>b</sup>                      | 27 (28)        | 12 (25)        | 15 (30)        |
| Chronic obstructive lung disease                 | 3 (3)          | 1 (2)          | 2 (4)          |
| Asthma                                           | 8 (8)          | 6 (13)         | 2 (4)          |
| Current smoker                                   | 12 (12)        | 6 (13)         | 6 (12)         |
| Ischemic heart disease                           | 8 (8)          | 2 (4)          | 6 (12)         |
| Heart failure                                    | 3 (3)          | 2 (4)          | 1 (2)          |
| Atrial fibrillation                              | 5 (5)          | 3 (6)          | 2 (4)          |
| Cancer                                           | 10 (10)        | 5 (10)         | 5 (10)         |
| Chronic kidney disease                           | 9 (9)          | 5 (10)         | 4 (8)          |

<sup>a</sup> Diagnosis of hypertension or use of antihypertensive drugs

<sup>b</sup> Diagnosis of hyperlipidemia or use of lipid lowering therapy

Missing values were: n=1 for days since symptom onset, n=20 for body mass index, n=1 for oxygen flow of oxygen therapy, n=1 for body temperature, n=1 for heart rate, n=3 for respiratory rate, n=3 for C-reactive protein, n=7 for white cell count and n=22 for eGFR.

eGFR: estimated glomerular filtration rate

The results of primary and secondary outcome analyses are presented in Table 2.

Kaplan-Meier estimates of the median duration of oxygen therapy were 5.5 (IQR 3, 9) days in the ciclesonide group and 4 (2, 7) days in the standard care group. (Figure 2).

The HR for termination of oxygen therapy during 30 days following randomization, used to compare ciclesonide vs standard care, showed that ciclesonide treatment was not statistically significantly associated with the duration of oxygen therapy (0.73 (95% CI 0.47 to 1.11)).

1  
2  
3 The research question that we aimed to assess was whether inhaled ciclesonide, as  
4 compared with standard care, could reduce the time to clinical improvement (as  
5 indicated by duration of oxygen therapy). While the interpretation of statistically non-  
6 significant findings is a recurring and well-known subject of debate in the medical  
7 literature, it is generally not recommended to use a binary interpretation based on an  
8 arbitrary cut-off for statistical significance<sup>22-25</sup>. This is particularly important in this trial  
9 as it was terminated early and thereby underpowered to assess its primary outcome.  
10 However, it has been suggested that in trials with statistically non-significant findings,  
11 the 95% CIs should be used to rule in or rule out potential effect sizes of the  
12 intervention. In this study, we therefore assessed the largest benefit of ciclesonide  
13 that was compatible with the confidence interval. Such a benefit was represented by  
14 the upper limit of the HR for time to termination of oxygen therapy (a higher HR  
15 indicates shorter duration of oxygen therapy for the ciclesonide group), i.e., 1.11. We  
16 took the inverse of this HR ( $1/1.11 = 0.90$ ) to calculate the relative reduction in  
17 duration of oxygen therapy that the HR was compatible with (i.e.,  $1-0.90 = 10\%$   
18 relative reduction). We then multiplied this 10% relative reduction with the absolute  
19 duration of oxygen therapy in the standard care group to calculate the corresponding  
20 absolute difference in duration of oxygen therapy ( $10\% * 4 \text{ days} = 0.4 \text{ days}$ , which is  
21  $<1 \text{ day}$ ). Given the pre-specified minimally clinically important difference of 2 days  
22 (which was used for the power calculation of the study), we deemed this best-case  
23 difference to be clinically irrelevant.

24  
25  
26  
27  
28  
29  
30  
31  
32  
33  
34  
35  
36  
37  
38  
39  
40  
41  
42  
43  
44  
45  
46  
47  
48  
49  
50  
51  
52  
53  
54  
55 In the per-protocol analysis, the HR for termination of oxygen therapy during 30 days  
56 following randomization was 0.79 (95% CI 0.51 to 1.23). In the additionally adjusted  
57  
58  
59  
60

analysis, the HR for termination of oxygen therapy was 0.68 (95% CI 0.43 to 1.09) (Table 2).

**Table 2** Outcomes. All outcomes are recorded during 30 days following randomization unless otherwise indicated.

|                                                                     | <b>Ciclesonide</b> | <b>Standard care</b> | <b>Difference<sup>a</sup></b> |
|---------------------------------------------------------------------|--------------------|----------------------|-------------------------------|
| <b>Primary outcome</b>                                              |                    |                      |                               |
| Duration of oxygen therapy, median (IQR) days                       | 5.5 (3, 9)         | 4 (2, 7)             | 0.73 (0.47 to 1.11)           |
| <b>Key secondary outcome</b>                                        |                    |                      |                               |
| Death or invasive mechanical ventilation, n (%)                     | 3 (6)              | 3 (6)                | 0 (-9 to 10)                  |
| Time to death or invasive mechanical ventilation, median (IQR) days | 2 (2, 10)          | 4 (2, 7)             | 0.90 (0.15 to 5.32)           |
| <b>Secondary outcomes</b>                                           |                    |                      |                               |
| Death, n (%)                                                        | 2 (4)              | 1 (2)                | -                             |
| Invasive mechanical ventilation, n (%)                              | 1 (2)              | 3 (6)                | -                             |
| Admission to an intensive care unit, n (%)                          | 4 (8)              | 4 (8)                | -                             |
| mMRC dyspnea scale score at day 30-35, median (IQR) <sup>b</sup>    | 3 (2, 4)           | 3 (2, 4)             | 0.97                          |
| mMRC dyspnea scale score 0 at day 30-35, n (%) <sup>b</sup>         | 4 (9)              | 7 (15)               | 0.48 (0.11 to 2.04)           |
| <b>Per protocol analysis<sup>c</sup></b>                            |                    |                      |                               |
| Duration of oxygen therapy, median (IQR) days                       | 5 (3, 9)           | 4 (2, 7)             | 0.79 (0.51 to 1.23)           |
| <b>Additionally adjusted analysis<sup>d</sup></b>                   |                    |                      |                               |
| Duration of oxygen therapy, median (IQR) days                       | 5 (3, 9)           | 4.5 (2, 7)           | 0.68 (0.43 to 1.09)           |

<sup>a</sup>. Differences are expressed as hazard ratios (95% CI) estimated using a Cox proportional hazards model for time to event outcomes and as absolute risk difference (95% CI) in percent for outcomes of absolute risk. The comparison of the mMRC dyspnea score was done using the Kruskal-Wallis test and the difference is expressed as a p-value. The comparison of the likelihood of reporting a mMRC score of 0 was done using a logistic regression model and the difference is expressed as an odds ratio (95% CI). Statistical testing for differences in proportions and time-to-event analyses were not performed for the secondary outcome events, including death, invasive mechanical ventilation, and admission to an intensive care unit due to few events.



1  
2  
3 <sup>b</sup>. Not including 1 participant in the standard care group and 2 participants in the ciclesonide group who died within  
4 30 days of randomization and 1 participant in the standard care group and 1 participant in the ciclesonide group with  
5 missing data on this outcome.  
6  
7

8  
9 <sup>c</sup>. In the per-protocol analysis for duration of oxygen therapy, patients assigned to ciclesonide were censored at the  
10 time of discontinuing treatment.  
11

12  
13 <sup>d</sup>. In addition to age, sex and study center, this analysis of duration of oxygen therapy was adjusted for days since  
14 symptom onset, c-reactive protein, white blood count (as continuous variables) and diabetes mellitus, hypertension  
15 and hyperlipidemia (as categorical variables). The analyses included n=46 in the standard care group and n=45 in the  
16 ciclesonide group without missing data on any of the variables included in the model.  
17  
18  
19  
20  
21  
22

23  
24 In total, 3 (6%) participants assigned to ciclesonide and 3 (6%) participants assigned  
25 to standard care experienced the key secondary outcome of mechanical invasive  
26 ventilation or death (absolute difference 0% (95% CI -10 to 9%; HR 0.90 (95% CI  
27 0.15 to 5.32)). Median mMRC dyspnea score at 30-35 days after randomization was  
28 3 (IQR 2, 4) in both groups (p-value for difference 0.97) (Table 2).  
29  
30  
31  
32  
33  
34  
35  
36  
37

38  
39 There were no apparent differences between the groups in treatments that  
40 participants received after randomization (Table 3); 26 (54%) of the participants  
41 assigned to ciclesonide and 22 (44%) of the participants in the standard care group  
42 received treatment with systemic corticosteroids after randomization.  
43  
44  
45  
46  
47  
48  
49

50  
51 Few serious adverse clinical events occurred during the study. The most frequently  
52 reported adverse event was dry mouth (7 (15%) participants in the ciclesonide group  
53 and 11 (22%) participants in the standard care group). Two participants assigned to  
54 ciclesonide and 0 in the placebo group reported that they experienced oral  
55  
56  
57  
58  
59  
60

candidiasis (Table 3).

**Table 3** Participants' treatments and adverse clinical events through day 30 after randomization.

|                                          | <b>Ciclesonide</b><br>(n=48) | <b>Standard care</b><br>(n=50) |
|------------------------------------------|------------------------------|--------------------------------|
| <b>Received treatment, n (%)</b>         |                              |                                |
| Systemic corticosteroids                 | 26 (54)                      | 22 (44)                        |
| Remdesivir                               | 4 (8)                        | 5 (10)                         |
| Low-molecular-weight heparin             | 45 (94)                      | 45 (90)                        |
| Oral anticoagulants                      | 32 (67)                      | 30 (60)                        |
| Vasopressors                             | 4 (8)                        | 3 (6)                          |
| Non-invasive mechanical ventilation      | 8 (17)                       | 7 (14)                         |
| <b>Serious clinical events, n (%)</b>    |                              |                                |
| Renal failure                            | 2 (4)                        | 3 (6)                          |
| Cardiac arrest                           | 1 (2)                        | 0 (0)                          |
| New onset atrial fibrillation            | 0 (0)                        | 1 (2)                          |
| Pulmonary embolism                       | 4 (8)                        | 2 (4)                          |
| Other thromboembolic events              | 0 (0)                        | 1 (2)                          |
| Sepsis                                   | 3 (6)                        | 2 (4)                          |
| Other serious event                      | 1 (2)                        | 0 (0)                          |
| <b>Non-serious adverse events, n (%)</b> |                              |                                |
| Nausea                                   | 6 (13)                       | 8 (16)                         |
| Dry mouth                                | 7 (15)                       | 11 (22)                        |
| Oral candidiasis                         | 2 (4)                        | 0 (0)                          |
| Other non-serious adverse event          | 3 (6)                        | 1 (2)                          |

1  
2  
3 Some pre-specified analyses were not performed due to small sample size or low  
4  
5 number of events. These included statistical testing of differences in proportions and  
6  
7 time-to-event analyses for non-key secondary outcomes, including death, invasive  
8  
9 mechanical ventilation, and admission to an intensive care unit; the secondary  
10  
11 outcome analyses of discharge from hospital; subgroup analyses, and the primary  
12  
13 outcome analysis after exclusion of participants who received invasive mechanical  
14  
15 ventilation or died.  
16  
17  
18  
19  
20  
21

## 22 Discussion

23  
24  
25  
26  
27 In this randomized open-label, controlled trial, including 98 hospitalized Covid-19  
28  
29 patients with ongoing oxygen therapy, treatment with inhaled ciclesonide did not  
30  
31 result in a statistically significant reduction in the duration of oxygen therapy, used as  
32  
33 a measure of time to clinical improvement. The trial ruled out, with 0.95 confidence,  
34  
35 treatments effects of ciclesonide corresponding to more than a one-day reduction in  
36  
37 duration of oxygen therapy.  
38  
39  
40  
41  
42

43 While previous randomized controlled trials have assessed effects of inhaled  
44  
45 corticosteroids, including budesonide<sup>14 15</sup> and ciclesonide<sup>16 17</sup>, in non-hospitalized  
46  
47 patients with Covid-19, this is the first trial that includes hospitalized patients with  
48  
49 more severe forms of the disease. In contrast to our hypothesis, the median duration  
50  
51 of oxygen therapy was nominally longer among patients assigned to ciclesonide vs  
52  
53 standard care (5.5 vs 4 days; HR for termination of oxygen therapy 0.73 (95% CI  
54  
55 0.47 to 1.11)). As such, the 95% CI indicates that,<sup>24</sup> even in the best case,  
56  
57 ciclesonide may reduce the duration of oxygen therapy with only 10% (1-1/1.11; less  
58  
59  
60

1  
2  
3 than 1 day in our study) while it may in the worst case result in an over 2-fold  
4  
5 increase. Thus, the results of this trial indicate that ciclesonide is unlikely to provide a  
6  
7 clinically meaningful beneficial effect on the duration of oxygen therapy in  
8  
9 hospitalized Covid-19 patients receiving oxygen therapy.  
10  
11  
12  
13

14 To date, 2 randomized controlled trials of ciclesonide in non-hospitalized patients with  
15  
16 Covid-19 have been presented. In the CONTAIN study,<sup>16</sup> which was terminated early  
17  
18 due to slow recruitment, 215 non-hospitalized patients with a median of 3 days  
19  
20 symptom duration were randomized to combination treatment with intranasal and  
21  
22 inhaled ciclesonide or placebo. No statistically significant difference between the  
23  
24 groups was observed for the primary endpoint, resolution of respiratory symptoms at  
25  
26 day 7 after randomization, which was reached by 40% of the patients in the treatment  
27  
28 group vs 35% in the placebo group (adjusted risk difference of 5.5% (95% CI -7.8%  
29  
30 to 18.8%).<sup>16</sup> Six (6%) patients assigned to ciclesonide vs 3 (3%) in the placebo group  
31  
32 were hospitalized within 14 days; none died. In another clinical trial of ciclesonide,  
33  
34 including 400 non-hospitalized patients with Covid-19,<sup>17</sup> randomization to ciclesonid  
35  
36 vs placebo did not result in a reduced time to alleviation of all Covid-19 related  
37  
38 symptoms. However, in secondary outcome analyses, patients assigned to  
39  
40 ciclesonide had fewer emergency department visits or hospital admissions for  
41  
42 reasons related to COVID-19 (odds ratio, 0.18, 95% CI, 0.04 to 0.85).  
43  
44  
45  
46  
47  
48  
49  
50

51 In addition, 2 randomized clinical trials of the inhaled corticosteroid budesonide in  
52  
53 non-hospitalized patients with Covid-19 have been presented. The STOIC trial was  
54  
55 an open-label trial comparing inhaled budesonide vs standard care in 146 Covid-19  
56  
57 patients with mild symptoms.<sup>14</sup> Compared to standard care, budesonide treatment  
58  
59  
60

1  
2  
3 led to a statistically significant reduction in Covid-19-related emergency department  
4 assessment and hospitalization (difference in proportions 0.123 (95% CI 0.043 to  
5 0.218)).<sup>14</sup> Furthermore, budesonide treatment was associated with 1 day shorter time  
6 to clinical recovery. The PRINCIPLE trial was another open-label trial that included  
7 4700 primary care patients at high risk of developing severe Covid-19 (1073  
8 randomized to budesonide treatment; 1988 to standard care; 1639 to other  
9 treatments).<sup>15</sup> Compared to standard care, randomization to budesonide led to a  
10 shorter time to self-reported recovery (difference 2.94 days (95% Bayesian credible  
11 interval 1.19 to 5.12) and a reduced likelihood of hospital admission or death,  
12 although the results for the latter outcomes did not meet the superiority threshold.  
13  
14  
15  
16  
17  
18  
19  
20  
21  
22  
23  
24  
25  
26  
27

28 Taken together, the previous studies indicate that inhaled corticosteroids might be  
29 useful for preventing deterioration of Covid-19 in non-hospitalized patients with mild  
30 symptoms. It is possible that the low likelihood of benefit associated with ciclesonide  
31 treatment observed in our study reflects the more severe pulmonary inflammation in  
32 our study population, as indicated by the need for hospitalization with oxygen therapy  
33 and a median symptom duration of 9 days: at such stages of disease progression, it  
34 could be speculated that pulmonary administration of corticosteroids may not suffice  
35 to confer benefit and that systemic treatment is needed. Accordingly, in the Recovery  
36 trial of hospitalized Covid-19 patients,<sup>26</sup> dexamethasone treatment reduced risk of  
37 death and the time to discharge from hospital, with these benefits primarily being  
38 observed among patients receiving oxygen therapy or invasive mechanical ventilation  
39 at baseline.  
40  
41  
42  
43  
44  
45  
46  
47  
48  
49  
50  
51  
52  
53  
54  
55  
56  
57

58 Similar to other clinical trials including patients with Covid-19,<sup>15 26 27</sup> we used a  
59  
60

1  
2  
3 pragmatic, open-label design. With this design, we intended to assess the effect of  
4  
5 adding ciclesonide to standard care, rather than to examine the effect of ciclesonide  
6  
7 compared to placebo. The research question that our study aimed to answer was  
8  
9 “what is the effect of using ciclesonide as an addition to standard care as compared  
10  
11 with standard care alone?” While this is a research question of relevance to clinical  
12  
13 decision-making, the open-label design and the possible expectations of effect  
14  
15 among both patients<sup>28</sup> and physicians might have affected the outcomes in our study,  
16  
17 including when to terminate oxygen therapy. Another limitation of our study is that we  
18  
19 were unable to recruit the intended number of patients due to the substantial  
20  
21 decrease in hospitalized Covid-19 patients in Sweden during 2021. Importantly, the  
22  
23 study could not provide much information regarding the key secondary outcome of  
24  
25 death or invasive mechanical intervention. Further research in hospitalized Covid-19  
26  
27 patients is needed to determine the potential effect of ciclesonide treatment on these  
28  
29 outcomes. Moreover, it is a possibility that effects of ciclesonide differ as compared to  
30  
31 other inhaled corticosteroids (e.g., budesonide). Patients were instructed to use  
32  
33 ciclesonide without a spacer after discharge from the hospital; this may have affected  
34  
35 drug delivery. Finally, results from the Recovery Trial were released 5 weeks after the  
36  
37 initiation of our study and around half of the patients in both the ciclesonide group  
38  
39 and the control group received systemic corticosteroids after randomization. Further  
40  
41 studies would be needed to assess the comparative effectiveness and safety of  
42  
43 ciclesonide vs systemic corticosteroids.  
44  
45  
46  
47  
48  
49  
50  
51  
52

## 53 **Conclusions**

54  
55  
56 In this open-label randomized controlled trial in patients hospitalized with Covid-19  
57  
58 and receiving oxygen therapy, the findings indicated that treatment with ciclesonide  
59  
60

1  
2  
3 vs standard care is unlikely to result in a clinically meaningful reduction in the  
4  
5 duration of oxygen therapy.  
6  
7  
8  
9

## 10 11 **Acknowledgements**

12  
13  
14 We would like to thank the following individuals that did not qualify for authorship but  
15  
16 contributed to the study: Dr Oscar Bakhouch (Skaraborg Hospital), Dr Eva-Marie  
17  
18 Boman and Dr Anders Lundqvist (Southern Älvsborg Hospital).  
19  
20  
21  
22  
23

## 24 **Contributorship statement**

25  
26  
27  
28 DB, PU, PT, OB and DPA conceived the study and were responsible for the  
29  
30 methods. OB and DPA were responsible for the study conduct. DB, PU, OB and DPA  
31  
32 were responsible for the financing. PT validated the data. PU performed the main  
33  
34 analysis. DPA, PU and PT wrote the original draft of the manuscript. All authors  
35  
36 wrote, reviewed, and edited the manuscript. OB and DPA supervised the study. DB,  
37  
38 DPA, PU, PT and OB were responsible for administration of the project. DPA and OB  
39  
40 are the guarantors. DB, PT, AK, EW, SA, SW, OE, AN, AE, JG, JEK, SB, CU, ML,  
41  
42 BJ, JL, JLI, JH, OB and DPA enrolled participants in the study. The corresponding  
43  
44 author attests that all listed authors meet authorship criteria and that no others  
45  
46 meeting the criteria have been omitted.  
47  
48  
49  
50  
51  
52  
53

## 54 **Competing interests**

55  
56 This study received non-financial support from COVIS Pharma (study drug donation).  
57  
58 The authors have no conflict of interest to disclose.  
59  
60

## Funding/Support

This study was funded by the Swedish Heart and Lung Foundation (Number 20200421), The Axel and Margaret Ax:son Johnson Foundation (N/A), CIMED (N/A), and Strategic Research Program at Karolinska Institutet (Number 961507), the Stockholm County Council (Number: 954970, 963296, 962029), and the Västmanland County Council (Grant nr LTV-938409). PU was supported by grants from the Strategic Research Program in Epidemiology at Karolinska Institutet (N/A), and a Faculty Funded Career Position at Karolinska Institutet (N/A).

The funders had no role in the study design, conduct, collection, management, analysis, interpretation of data, writing or reviewing the manuscript or decision to submit the manuscript for publication. The study drug was donated by COVIS Pharma but COVIS pharma did not participate in any other part of the study.

## Data sharing statement

Data are available upon reasonable request

## Ethics Approval

All participants provided written informed consent. The study was approved by the Swedish Ethical Review Authority (Ethics committee number 2020-02183) and the Swedish Medical Products Agency (Eudra-CT number 2020-001928-34) and registered at [clinicaltrials.gov](https://clinicaltrials.gov) (NCT04381364).

## References



- 1  
2  
3  
4 1. Gibson PG, Qin L, Pua SH. COVID-19 acute respiratory  
5 distress syndrome (ARDS): clinical features and  
6 differences from typical pre-COVID-19 ARDS. *Med J Aust*  
7  
8 2020;213(2):54-56 e1. doi: 10.5694/mja2.50674 [published  
9  
10 Online First: 2020/06/24]  
11  
12
- 13  
14  
15 2. Bos LDJ. COVID-19-related Acute Respiratory Distress  
16 Syndrome: Not So Atypical. *Am J Respir Crit Care Med*  
17  
18 2020;202(4):622-24. doi: 10.1164/rccm.202004-1423LE  
19  
20 [published Online First: 2020/06/25]  
21  
22
- 23  
24  
25 3. Festic E, Carr GE, Cartin-Ceba R, et al. Randomized Clinical  
26 Trial of a Combination of an Inhaled Corticosteroid and  
27 Beta Agonist in Patients at Risk of Developing the Acute  
28 Respiratory Distress Syndrome. *Crit Care Med*  
29  
30 2017;45(5):798-805. doi:  
31  
32 10.1097/CCM.0000000000002284 [published Online First:  
33  
34 2017/02/28]  
35  
36
- 37  
38  
39 4. Mohamed HS, Meguid MM. Effect of nebulized budesonide  
40 on respiratory mechanics and oxygenation in acute lung  
41 injury/acute respiratory distress syndrome: Randomized  
42 controlled study. *Saudi J Anaesth* 2017;11(1):9-14. doi:  
43  
44 10.4103/1658-354X.197369 [published Online First:  
45  
46 2017/02/22]  
47  
48
- 49  
50  
51 5. Jansson AH, Eriksson C, Wang X. Effects of budesonide and  
52 N-acetylcysteine on acute lung hyperinflation, inflammation  
53 and injury in rats. *Vascul Pharmacol* 2005;43(2):101-11.  
54  
55  
56  
57  
58  
59  
60

1  
2  
3  
4 doi: 10.1016/j.vph.2005.03.006 [published Online First:  
5  
6 2005/06/22]  
7

- 8  
9 6. Forsgren PE, Modig JA, Dahlback CM, et al. Prophylactic  
10 treatment with an aerosolized corticosteroid liposome in a  
11 porcine model of early ARDS induced by endotoxaemia.  
12  
13 *Acta Chir Scand* 1990;156(6-7):423-31. [published Online  
14  
15 First: 1990/06/01]  
16  
17  
18  
19 7. Wang J, Zhang L, Walther SM. Administration of aerosolized  
20 terbutaline and budesonide reduces chlorine gas-induced  
21  
22 acute lung injury. *J Trauma* 2004;56(4):850-62. doi:  
23  
24 10.1097/01.ta.0000078689.45384.8b [published Online  
25  
26 First: 2004/06/10]  
27  
28  
29  
30 8. Walther S, Jansson I, Berg S, et al. Pulmonary granulocyte  
31 accumulation is reduced by nebulized corticosteroid in  
32  
33 septic pigs. *Acta Anaesthesiol Scand* 1992;36(7):651-5.  
34  
35 doi: 10.1111/j.1399-6576.1992.tb03537.x [published  
36  
37 Online First: 1992/10/01]  
38  
39  
40  
41  
42 9. Yamaya M, Nishimura H, Deng X, et al. Inhibitory effects of  
43 glycopyrronium, formoterol, and budesonide on  
44  
45 coronavirus HCoV-229E replication and cytokine  
46  
47 production by primary cultures of human nasal and  
48  
49 tracheal epithelial cells. *Respir Investig* 2020;58(3):155-68.  
50  
51 doi: 10.1016/j.resinv.2019.12.005 [published Online First:  
52  
53 2020/02/26]  
54  
55  
56  
57  
58  
59  
60

- 1  
2  
3  
4 10. Peters MC, Sajuthi S, Deford P, et al. COVID-19-related  
5 Genes in Sputum Cells in Asthma. Relationship to  
6 Demographic Features and Corticosteroids. *Am J Respir*  
7 *Crit Care Med* 2020;202(1):83-90. doi:  
8 10.1164/rccm.202003-0821OC [published Online First:  
9 2020/04/30]  
10  
11  
12  
13  
14  
15  
16  
17  
18 11. Milne S, Li X, Yang CX, et al. Inhaled corticosteroids  
19 downregulate SARS-CoV-2-related genes in COPD:  
20 results from a randomised controlled trial. *Eur Respir J*  
21 2021;58(1) doi: 10.1183/13993003.00130-2021 [published  
22 Online First: 2021/04/03]  
23  
24  
25  
26  
27  
28  
29 12. Jeon S, Ko M, Lee J, et al. Identification of Antiviral Drug  
30 Candidates against SARS-CoV-2 from FDA-Approved  
31 Drugs. *Antimicrob Agents Chemother* 2020;64(7) doi:  
32 10.1128/AAC.00819-20 [published Online First:  
33 2020/05/06]  
34  
35  
36  
37  
38  
39  
40  
41 13. Kimura H, Kurusu H, Sada M, et al. Molecular  
42 pharmacology of ciclesonide against SARS-CoV-2. *J*  
43 *Allergy Clin Immunol* 2020;146(2):330-31. doi:  
44 10.1016/j.jaci.2020.05.029 [published Online First:  
45 2020/07/01]  
46  
47  
48  
49  
50  
51  
52 14. Ramakrishnan S, Nicolau DV, Jr., Langford B, et al. Inhaled  
53 budesonide in the treatment of early COVID-19 (STOIC): a  
54 phase 2, open-label, randomised controlled trial. *Lancet*  
55  
56  
57  
58  
59  
60

- 1  
2  
3  
4       *Respir Med* 2021;9(7):763-72. doi: 10.1016/S2213-  
5       2600(21)00160-0 [published Online First: 2021/04/13]  
6  
7  
8  
9       15. Yu LM, Bafadhel M, Dorward J, et al. Inhaled budesonide  
10       for COVID-19 in people at high risk of complications in the  
11       community in the UK (PRINCIPLE): a randomised,  
12       controlled, open-label, adaptive platform trial. *Lancet*  
13       2021;398(10303):843-55. doi: 10.1016/S0140-  
14       6736(21)01744-X [published Online First: 2021/08/14]  
15  
16  
17  
18       16. Ezer N, Belga S, Daneman N, et al. Inhaled and intranasal  
19       ciclesonide for the treatment of covid-19 in adult  
20       outpatients: CONTAIN phase II randomised controlled trial.  
21       *BMJ* 2021;375:e068060. doi: 10.1136/bmj-2021-068060  
22       [published Online First: 2021/11/04]  
23  
24  
25  
26  
27  
28  
29  
30  
31  
32  
33  
34       17. Clemency BM, Varughese R, Gonzalez-Rojas Y, et al.  
35       Efficacy of Inhaled Ciclesonide for Outpatient Treatment of  
36       Adolescents and Adults With Symptomatic COVID-19: A  
37       Randomized Clinical Trial. *JAMA Intern Med* 2021 doi:  
38       10.1001/jamainternmed.2021.6759 [published Online First:  
39       2021/11/23]  
40  
41  
42  
43  
44  
45  
46  
47  
48       18. Characterisation WHOWGotC, Management of C-i. A  
49       minimal common outcome measure set for COVID-19  
50       clinical research. *Lancet Infect Dis* 2020;20(8):e192-e97.  
51       doi: 10.1016/S1473-3099(20)30483-7 [published Online  
52       First: 2020/06/17]  
53  
54  
55  
56  
57  
58  
59  
60

- 1  
2  
3  
4 19. Mahler DA, Wells CK. Evaluation of clinical methods for  
5 rating dyspnea. *Chest* 1988;93(3):580-6. doi:  
6 10.1378/chest.93.3.580 [published Online First:  
7 1988/03/01]  
8  
9  
10  
11  
12  
13 20. Bestall JC, Paul EA, Garrod R, et al. Usefulness of the  
14 Medical Research Council (MRC) dyspnoea scale as a  
15 measure of disability in patients with chronic obstructive  
16 pulmonary disease. *Thorax* 1999;54(7):581-6. doi:  
17 10.1136/thx.54.7.581 [published Online First: 1999/06/22]  
18  
19  
20  
21  
22  
23  
24  
25 21. Directive 2001/20/EC of the European Parliament and of the  
26 Council of 4 April 2001 on the approximation of the laws,  
27 regulations and administrative provisions of the member  
28 states relating to the implementation of good clinical  
29 practice in the conduct of clinical trials on medicinal  
30 products for human use. *Med Etika Bioet* 2002;9(1-2):12-9.  
31 [published Online First: 2005/11/10]  
32  
33  
34  
35  
36  
37  
38  
39  
40  
41 22. Altman DG, Bland JM. Absence of evidence is not evidence  
42 of absence. *BMJ* 1995;311(7003):485. doi:  
43 10.1136/bmj.311.7003.485 [published Online First:  
44 1995/08/19]  
45  
46  
47  
48  
49  
50 23. Harrell F. Statistical Errors in the Medical Literature.  
51 Statistical Thinking.  
52 <https://www.fharrell.com/post/errmed/index.html> (accessed  
53 Oct 24, 2022). ed, 2017.  
54  
55  
56  
57  
58  
59  
60

- 1  
2  
3  
4 24. Hawkins AT, Samuels LR. Use of Confidence Intervals in  
5  
6 Interpreting Nonstatistically Significant Results. *JAMA*  
7  
8 2021;326(20):2068-69. doi: 10.1001/jama.2021.16172  
9  
10 [published Online First: 2021/11/24]  
11  
12  
13 25. Greenland S, Senn SJ, Rothman KJ, et al. Statistical tests,  
14  
15 P values, confidence intervals, and power: a guide to  
16  
17 misinterpretations. *Eur J Epidemiol* 2016;31(4):337-50.  
18  
19 doi: 10.1007/s10654-016-0149-3 [published Online First:  
20  
21 2016/05/23]  
22  
23  
24 26. Group RC, Horby P, Lim WS, et al. Dexamethasone in  
25  
26 Hospitalized Patients with Covid-19. *N Engl J Med*  
27  
28 2021;384(8):693-704. doi: 10.1056/NEJMoa2021436  
29  
30 [published Online First: 2020/07/18]  
31  
32  
33 27. Investigators R-C, Gordon AC, Mouncey PR, et al.  
34  
35 Interleukin-6 Receptor Antagonists in Critically Ill Patients  
36  
37 with Covid-19. *N Engl J Med* 2021;384(16):1491-502. doi:  
38  
39 10.1056/NEJMoa2100433 [published Online First:  
40  
41 2021/02/26]  
42  
43  
44 28. Wechsler ME, Kelley JM, Boyd IO, et al. Active albuterol or  
45  
46 placebo, sham acupuncture, or no intervention in asthma.  
47  
48 *N Engl J Med* 2011;365(2):119-26. doi:  
49  
50 10.1056/NEJMoa1103319 [published Online First:  
51  
52 2011/07/15]  
53  
54  
55  
56  
57  
58  
59  
60

1  
2  
3  
4  
5  
6  
7  
8  
9  
10  
11  
12  
13  
14  
15  
16  
17  
18  
19  
20  
21  
22  
23  
24  
25  
26  
27  
28  
29  
30  
31  
32  
33  
34  
35  
36  
37  
38  
39  
40  
41  
42  
43  
44  
45  
46  
47  
48  
49  
50  
51  
52  
53  
54  
55  
56  
57  
58  
59  
60

For peer review only

1  
2  
3 **Figure 1** Flow diagram for study participants.  
4

5 **Figure 2** Time to termination of oxygen therapy during 30 days after randomization.  
6  
7  
8  
9  
10  
11  
12  
13  
14  
15  
16  
17  
18  
19  
20  
21  
22  
23  
24  
25  
26  
27  
28  
29  
30  
31  
32  
33  
34  
35  
36  
37  
38  
39  
40  
41  
42  
43  
44  
45  
46  
47  
48  
49  
50  
51  
52  
53  
54  
55  
56  
57  
58  
59  
60

For peer review only



1 **Figure 1**  
2  
3  
4  
5  
6  
7  
8



26  
27  
28  
29  
30  
31  
32  
33  
34  
35  
36  
37  
38  
39  
40  
41

**Figure 2** Time to termination of oxygen therapy.



| No at risk    |    | 0  | 5  | 10 | 15 | 20 | 25 | 30 |
|---------------|----|----|----|----|----|----|----|----|
| Standard care | 50 | 24 | 7  | 6  | 4  | 2  | 2  |    |
| Ciclesonide   | 48 | 31 | 11 | 5  | 2  | 1  | 1  |    |

ew only

1  
2  
3 **ONLINE APPENDIX**  
4

5 Brodin D, Tornhammar P, Ueda P, Krifors A, Westerlund E, Athlin S, Wojt S, Elvstam O,  
6 Neumann A, Elshani A, Giesecke J, Edvardsson J, Bunpuckdee S, Unge C, Larsson M,  
7 Johansson B, Ljungberg J, Lindell J, Hansson J, Blennow O, Andersson DP. Inhaled  
8 Ciclesonide in Adults Hospitalized with Covid-19: a Randomized Controlled Open-label Trial  
9 (HALT Covid-19).  
10  
11  
12  
13  
14  
15  
16  
17  
18  
19  
20  
21  
22  
23  
24  
25  
26  
27  
28  
29  
30  
31  
32  
33  
34  
35  
36  
37  
38  
39  
40  
41  
42  
43  
44  
45  
46  
47  
48  
49  
50  
51  
52  
53  
54  
55  
56  
57  
58  
59  
60

For peer review only

## Protocol changes and rationale

The trial was designed in the beginning of the covid-19 pandemic when data from randomized clinical trials of Covid-19 treatment were scarce. After trial initiation, treatments for patients with Covid-19 and hospitalization rates of such patients changed rapidly. Therefore, we made changes to the protocol and the trial was stopped early.

5 weeks after the start of patient inclusion in our study, in July 2020, the Recovery Collaborative group presented preliminary data<sup>1</sup> showing protective effects of dexamethasone treatment in patients hospitalized for covid-19; a subgroup analysis of this study indicated that the effect was driven by patients receiving invasive mechanical ventilation or oxygen therapy. These data, in combination with local experience from treating patients with Covid-19,<sup>2</sup> led to most patients receiving oxygen therapy with  $\geq 4$  L oxygen/min at the study hospitals being treated with systemic corticosteroids. As use of systemic corticosteroids was an exclusion criterion, the change in practice made a large proportion of the Covid-19 patients ineligible for participation.

Initially the trial was conducted at 4 hospitals. To increase the inclusion rate, 9 additional hospitals were included as study sites, although only 5 of them ended up recruiting patients to the study. We also removed the previous upper age limit of 85 years for inclusion and allowed for inclusion of patients based on a positive antigen test for SARS-CoV-2. Moreover, because some patients may start receiving oxygen therapy before hospital admission (e.g., at nursing homes before being transported

1  
2  
3 to the hospital) or a period after hospital admission (e.g., if the patient's condition  
4 deteriorated) and we aimed to include patients shortly after initiation of such therapy,  
5  
6 we changed the inclusion criteria from hospitalization within 48 hours prior to  
7  
8 enrollment to initiation of oxygen therapy no longer than 48 hours prior to enrollment.  
9  
10  
11  
12  
13

14 All changes were approved by the Data Monitoring Committee, Ethical Review  
15 Authority and the Swedish Medical Products Agency and implemented from  
16  
17 December 2020.  
18  
19  
20  
21  
22  
23

24 In June 2021, when 99 patients had been included in the study, a large and  
25 increasing proportion of the adult Swedish population had received vaccination for  
26  
27 Covid-19. The number of patients hospitalized with Covid-19 had dropped  
28  
29 substantially and there were none to only a few Covid-19 patients admitted to the  
30  
31 study hospitals per week. We determined that it was unlikely that we would reach the  
32  
33 intended sample size and asked the Data Monitoring Committee to convene for a  
34  
35 meeting. Following the recommendation of the Data Monitoring Committee, the study  
36  
37 was terminated early due to expected futility to meet total enrolment.  
38  
39  
40  
41  
42  
43  
44  
45  
46  
47  
48  
49  
50  
51  
52  
53  
54  
55  
56  
57  
58  
59  
60

### Inclusion and exclusion criteria<sup>a</sup>

Participants were eligible for inclusion if, at the time of study inclusion, they (1) were aged  $\geq 18$  years, (2) had a polymerase chain reaction confirmed SARS-CoV-2 infection or a positive antigen test for SARS-CoV-2, (3) were hospitalized at any of the study hospitals and (4) were receiving oxygen therapy with not more than 48 hours having passed since initiation of this treatment.

Patients were not eligible for inclusion if they (1) had a history of hypersensitivity to ciclesonide or other substances included in the treatment, (2) received ongoing treatment with inhaled or oral corticosteroids, ketokonazol, itrakonazol, ritonavir or nelfinavir, (3) received  $>8$  L oxygen/min or  $>50$  % oxygen with nasal high-flow therapy, (4) were receiving or under consideration for palliative care or had an expected survival of less than 72 h, (5) were expected to be admitted to an intensive care unit within 48 h, (6) had active or inactive pulmonary tuberculosis, severe liver failure (Child-Pugh C), pulmonary arterial hypertension or fibrosis, cognitive or physical impairment, (7) had insufficient language skills to understand information given about the study, (8) had been included in a clinical trial within 30 days, or (9) were women and pregnant, breastfeeding or did not agree to take highly effective contraceptive measures while receiving treatment plus an additional 7 days.

<sup>a</sup> The presentation of these inclusion and exclusion criteria have been modified for readability as compared with the version presented in the study protocol.

**Appendix table 1** Number of participants included in the final study population by study center.

| <i>Study center</i>                     | <i>n participants</i> |
|-----------------------------------------|-----------------------|
| Danderyd Hospital                       | 26                    |
| Capio S:t Göran Hospital                | 24                    |
| Karolinska University Hospital          | 21                    |
| Västmanland County Hospital             | 13                    |
| Örebro University Hospital <sup>a</sup> | 6                     |
| Växjö Central Hospital <sup>a</sup>     | 3                     |
| Halland County Hospital <sup>a</sup>    | 2                     |
| Östersund Hospital <sup>a</sup>         | 2                     |
| Visby Hospital <sup>a</sup>             | 1                     |

<sup>a</sup> In the analyses adjusted for study center, these hospitals were categorized into one group.

## References

1. Group RC, Horby P, Lim WS, et al. Dexamethasone in Hospitalized Patients with Covid-19. *N Engl J Med* 2021;384(8):693-704. doi: 10.1056/NEJMoa2021436 [published Online First: 2020/07/18]
2. Kan B, Ahl M, Blennow O, et al. *Lakartidningen* 2020;117 [published Online First: 2020/10/07]

For peer review only



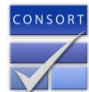

## CONSORT 2010 checklist of information to include when reporting a randomised trial\*

| Section/Topic                    | Item No | Checklist item                                                                                                                                                                              | Reported on page No |
|----------------------------------|---------|---------------------------------------------------------------------------------------------------------------------------------------------------------------------------------------------|---------------------|
| <b>Title and abstract</b>        |         |                                                                                                                                                                                             |                     |
|                                  | 1a      | Identification as a randomised trial in the title                                                                                                                                           | 1                   |
|                                  | 1b      | Structured summary of trial design, methods, results, and conclusions (for specific guidance see CONSORT for abstracts)                                                                     | 3                   |
| <b>Introduction</b>              |         |                                                                                                                                                                                             |                     |
| Background and objectives        | 2a      | Scientific background and explanation of rationale                                                                                                                                          | 5,6                 |
|                                  | 2b      | Specific objectives or hypotheses                                                                                                                                                           | 5-7                 |
| <b>Methods</b>                   |         |                                                                                                                                                                                             |                     |
| Trial design                     | 3a      | Description of trial design (such as parallel, factorial) including allocation ratio                                                                                                        | 6-9                 |
|                                  | 3b      | Important changes to methods after trial commencement (such as eligibility criteria), with reasons                                                                                          | 6,7,9               |
| Participants                     | 4a      | Eligibility criteria for participants                                                                                                                                                       | 7,8                 |
|                                  | 4b      | Settings and locations where the data were collected                                                                                                                                        | 6,7                 |
| Interventions                    | 5       | The interventions for each group with sufficient details to allow replication, including how and when they were actually administered                                                       | 6-11                |
| Outcomes                         | 6a      | Completely defined pre-specified primary and secondary outcome measures, including how and when they were assessed                                                                          | 9-11                |
|                                  | 6b      | Any changes to trial outcomes after the trial commenced, with reasons                                                                                                                       | 6,7                 |
| Sample size                      | 7a      | How sample size was determined                                                                                                                                                              | 6-9                 |
|                                  | 7b      | When applicable, explanation of any interim analyses and stopping guidelines                                                                                                                | 6,7                 |
| <b>Randomisation:</b>            |         |                                                                                                                                                                                             |                     |
| Sequence generation              | 8a      | Method used to generate the random allocation sequence                                                                                                                                      | 8                   |
|                                  | 8b      | Type of randomisation; details of any restriction (such as blocking and block size)                                                                                                         | 8                   |
| Allocation concealment mechanism | 9       | Mechanism used to implement the random allocation sequence (such as sequentially numbered containers), describing any steps taken to conceal the sequence until interventions were assigned | 8                   |
| Implementation                   | 10      | Who generated the random allocation sequence, who enrolled participants, and who assigned participants to interventions                                                                     | 8                   |
| Blinding                         | 11a     | If done, who was blinded after assignment to interventions (for example, participants, care providers, those                                                                                | 8,11                |

|                                                      |     |                                                                                                                                                   |       |
|------------------------------------------------------|-----|---------------------------------------------------------------------------------------------------------------------------------------------------|-------|
|                                                      |     | assessing outcomes) and how                                                                                                                       |       |
|                                                      | 11b | If relevant, description of the similarity of interventions                                                                                       | -     |
| Statistical methods                                  | 12a | Statistical methods used to compare groups for primary and secondary outcomes                                                                     | 10,11 |
|                                                      | 12b | Methods for additional analyses, such as subgroup analyses and adjusted analyses                                                                  | 10,11 |
| <b>Results</b>                                       |     |                                                                                                                                                   |       |
| Participant flow (a diagram is strongly recommended) | 13a | For each group, the numbers of participants who were randomly assigned, received intended treatment, and were analysed for the primary outcome    | 11-13 |
|                                                      | 13b | For each group, losses and exclusions after randomisation, together with reasons                                                                  | 11-13 |
| Recruitment                                          | 14a | Dates defining the periods of recruitment and follow-up                                                                                           | 6,7   |
|                                                      | 14b | Why the trial ended or was stopped                                                                                                                | 7     |
| Baseline data                                        | 15  | A table showing baseline demographic and clinical characteristics for each group                                                                  | Yes   |
| Numbers analysed                                     | 16  | For each group, number of participants (denominator) included in each analysis and whether the analysis was by original assigned groups           | Yes   |
| Outcomes and estimation                              | 17a | For each primary and secondary outcome, results for each group, and the estimated effect size and its precision (such as 95% confidence interval) | Yes   |
|                                                      | 17b | For binary outcomes, presentation of both absolute and relative effect sizes is recommended                                                       | -     |
| Ancillary analyses                                   | 18  | Results of any other analyses performed, including subgroup analyses and adjusted analyses, distinguishing pre-specified from exploratory         | 10,11 |
| Harms                                                | 19  | All important harms or unintended effects in each group (for specific guidance see CONSORT for harms)                                             | 13    |
| <b>Discussion</b>                                    |     |                                                                                                                                                   |       |
| Limitations                                          | 20  | Trial limitations, addressing sources of potential bias, imprecision, and, if relevant, multiplicity of analyses                                  | 13-17 |
| Generalisability                                     | 21  | Generalisability (external validity, applicability) of the trial findings                                                                         | 13-17 |
| Interpretation                                       | 22  | Interpretation consistent with results, balancing benefits and harms, and considering other relevant evidence                                     | 13-17 |
| <b>Other information</b>                             |     |                                                                                                                                                   |       |
| Registration                                         | 23  | Registration number and name of trial registry                                                                                                    | 6     |
| Protocol                                             | 24  | Where the full trial protocol can be accessed, if available                                                                                       | -     |
| Funding                                              | 25  | Sources of funding and other support (such as supply of drugs), role of funders                                                                   | 18,19 |

\*We strongly recommend reading this statement in conjunction with the CONSORT 2010 Explanation and Elaboration for important clarifications on all the items. If relevant, we also recommend reading CONSORT extensions for cluster randomised trials, non-inferiority and equivalence trials, non-pharmacological treatments, herbal interventions, and pragmatic trials. Additional extensions are forthcoming: for those and for up to date references relevant to this checklist, see [www.consort-statement.org](http://www.consort-statement.org).

# BMJ Open

## Inhaled Ciclesonide in Adults Hospitalized with Covid-19: a Randomized Controlled Open-label Trial (HALT Covid-19)

|                                 |                                                                                                                                                                                                                                                                                                                                                                                                                                                                                                                                                                                                                                                                                                                                                                                                                                                                                                                                                                                                                                                                                                                                                                                                                                                                                                                                                                                                                                                                                                                |
|---------------------------------|----------------------------------------------------------------------------------------------------------------------------------------------------------------------------------------------------------------------------------------------------------------------------------------------------------------------------------------------------------------------------------------------------------------------------------------------------------------------------------------------------------------------------------------------------------------------------------------------------------------------------------------------------------------------------------------------------------------------------------------------------------------------------------------------------------------------------------------------------------------------------------------------------------------------------------------------------------------------------------------------------------------------------------------------------------------------------------------------------------------------------------------------------------------------------------------------------------------------------------------------------------------------------------------------------------------------------------------------------------------------------------------------------------------------------------------------------------------------------------------------------------------|
| Journal:                        | <i>BMJ Open</i>                                                                                                                                                                                                                                                                                                                                                                                                                                                                                                                                                                                                                                                                                                                                                                                                                                                                                                                                                                                                                                                                                                                                                                                                                                                                                                                                                                                                                                                                                                |
| Manuscript ID                   | bmjopen-2022-064374.R3                                                                                                                                                                                                                                                                                                                                                                                                                                                                                                                                                                                                                                                                                                                                                                                                                                                                                                                                                                                                                                                                                                                                                                                                                                                                                                                                                                                                                                                                                         |
| Article Type:                   | Original research                                                                                                                                                                                                                                                                                                                                                                                                                                                                                                                                                                                                                                                                                                                                                                                                                                                                                                                                                                                                                                                                                                                                                                                                                                                                                                                                                                                                                                                                                              |
| Date Submitted by the Author:   | 02-Feb-2023                                                                                                                                                                                                                                                                                                                                                                                                                                                                                                                                                                                                                                                                                                                                                                                                                                                                                                                                                                                                                                                                                                                                                                                                                                                                                                                                                                                                                                                                                                    |
| Complete List of Authors:       | <p>Brodin, Daniel; Capio Sankt Görans Sjukhus<br/>Tornhammar, Per; Karolinska Institute, Functional Area of Emergency Medicine<br/>Ueda, Peter; Karolinska Institutet<br/>Krifors, Anders; Karolinska Institutet, Department of Physiology and Pharmacology; Västmanlands sjukhus Västerås<br/>Westerlund, Eli; Danderyd University Hospital, Department of Clinical Sciences<br/>Athlin, Simon; Örebro University<br/>Wojt, Sandra; Danderyd University Hospital, Department of Internal Medicine<br/>Elvstam, Olof; Central Hospital Växjö, Department of Infectious Diseases<br/>Neumann, Anca; Capio Sankt Görans Sjukhus<br/>Elshani, Arsim; Karlskoga Hospital<br/>Giasecke, Julia; Karolinska Universitetssjukhuset<br/>Edvardsson-Källkvist, Jens; Karolinska University Hospital<br/>Bunpuckdee, Sayam; Karolinska Institutet<br/>Unge, Christian; Danderyd University Hospital, Department of Internal Medicine<br/>Larsson, Martin; Karolinska Institutet Department of Clinical Science and Education Sodersjukhuset<br/>Johansson, Björn; Halland County<br/>Ljungberg, Johan; Halland County<br/>Lindell, Jonas; Visby Hospital, Department of Infectious Diseases<br/>Hansson, Johan; Östersund Hospital, Department of Infectious Diseases<br/>Blennow, Ola; Karolinska University Hospital, Department of Infectious Diseases<br/>Andersson, Daniel Peter; Karolinska University Hospital, Department of Medicine Huddinge H7, Karolinska Institutet; Karolinska Institute, Medicine (H7)</p> |
| <b>Primary Subject Heading</b>: | Infectious diseases                                                                                                                                                                                                                                                                                                                                                                                                                                                                                                                                                                                                                                                                                                                                                                                                                                                                                                                                                                                                                                                                                                                                                                                                                                                                                                                                                                                                                                                                                            |
| Secondary Subject Heading:      | Respiratory medicine                                                                                                                                                                                                                                                                                                                                                                                                                                                                                                                                                                                                                                                                                                                                                                                                                                                                                                                                                                                                                                                                                                                                                                                                                                                                                                                                                                                                                                                                                           |
| Keywords:                       | COVID-19, Clinical trials < THERAPEUTICS, Respiratory infections < THORACIC MEDICINE                                                                                                                                                                                                                                                                                                                                                                                                                                                                                                                                                                                                                                                                                                                                                                                                                                                                                                                                                                                                                                                                                                                                                                                                                                                                                                                                                                                                                           |
|                                 |                                                                                                                                                                                                                                                                                                                                                                                                                                                                                                                                                                                                                                                                                                                                                                                                                                                                                                                                                                                                                                                                                                                                                                                                                                                                                                                                                                                                                                                                                                                |

1  
2  
3  
4  
5  
6  
7  
8  
9  
10  
11  
12  
13  
14  
15  
16  
17  
18  
19  
20  
21  
22  
23  
24  
25  
26  
27  
28  
29  
30  
31  
32  
33  
34  
35  
36  
37  
38  
39  
40  
41  
42  
43  
44  
45  
46  
47  
48  
49  
50  
51  
52  
53  
54  
55  
56  
57  
58  
59  
60





I, the Submitting Author has the right to grant and does grant on behalf of all authors of the Work (as defined in the below author licence), an exclusive licence and/or a non-exclusive licence for contributions from authors who are: i) UK Crown employees; ii) where BMJ has agreed a CC-BY licence shall apply, and/or iii) in accordance with the terms applicable for US Federal Government officers or employees acting as part of their official duties; on a worldwide, perpetual, irrevocable, royalty-free basis to BMJ Publishing Group Ltd ("BMJ") its licensees and where the relevant Journal is co-owned by BMJ to the co-owners of the Journal, to publish the Work in this journal and any other BMJ products and to exploit all rights, as set out in our [licence](#).

The Submitting Author accepts and understands that any supply made under these terms is made by BMJ to the Submitting Author unless you are acting as an employee on behalf of your employer or a postgraduate student of an affiliated institution which is paying any applicable article publishing charge ("APC") for Open Access articles. Where the Submitting Author wishes to make the Work available on an Open Access basis (and intends to pay the relevant APC), the terms of reuse of such Open Access shall be governed by a Creative Commons licence – details of these licences and which [Creative Commons](#) licence will apply to this Work are set out in our licence referred to above.

Other than as permitted in any relevant BMJ Author's Self Archiving Policies, I confirm this Work has not been accepted for publication elsewhere, is not being considered for publication elsewhere and does not duplicate material already published. I confirm all authors consent to publication of this Work and authorise the granting of this licence.

# Inhaled Ciclesonide in Adults Hospitalized with Covid-19: a Randomized Controlled Open-label Trial (HALT Covid-19)

Daniel Brodin<sup>1\*</sup>, MD; Per Tornhammar<sup>2,3\*</sup>, MD; Peter Ueda<sup>4\*\*</sup>, MD, PhD; Anders Krifors<sup>5,6</sup> MD; Eli Westerlund<sup>7</sup>, MD, PhD; Simon Athlin<sup>8</sup>, MD, PhD; Sandra Wojt<sup>9</sup>, MD; Olof Elvstam<sup>10</sup>, MD, PhD; Anca Neumann<sup>1</sup>, MD; Arsim Elshani<sup>11</sup>, MD; Julia Giesecke<sup>3</sup> MD; Jens Edvardsson-Källkvist<sup>3</sup>, MD; Sayam Bunpuckdee<sup>12</sup>, MD student; Christian Unge<sup>9</sup>, MD, PhD; Martin Larsson<sup>13,14</sup>, MD, PhD; Björn Johansson<sup>15</sup>, MD; Johan Ljungberg<sup>15</sup>, MD; Jonas Lindell<sup>16</sup>, MD; Johan Hansson<sup>17</sup>, MD, PhD; Ola Blennow<sup>1,3,18#</sup>, MD, PhD, Daniel P Andersson<sup>3,13#</sup> MD, PhD

\*Equal contributions

#Equal contributions

\*\*Corresponding author

## Correspondence

Ola Blennow MD, PhD Address: Department of Infectious Diseases, Karolinska University Hospital, Huddinge, 14141 Stockholm Sweden

Email: [ola.blennow@regionstockholm.se](mailto:ola.blennow@regionstockholm.se)

Phone: +46739813617

## Affiliations:

<sup>1</sup> Department of Internal Medicine, Capio St Göran's Hospital, Stockholm, Sweden

<sup>2</sup> Functional Area of Emergency Medicine, Karolinska University Hospital Huddinge, Stockholm, Sweden

1  
2  
3 <sup>3</sup> Department of Medicine (H7), Karolinska Institutet, Karolinska University Hospital,  
4  
5 Huddinge, 141 86 Stockholm, Sweden  
6

7 <sup>4</sup> Clinical Epidemiology Division, Department of Medicine Solna, Karolinska Institutet,  
8  
9 Stockholm, Sweden  
10

11  
12  
13 <sup>5</sup> Department of Physiology and Pharmacology, Karolinska Institutet, Stockholm,  
14  
15 Sweden.  
16

17  
18 <sup>6</sup> Centre for Clinical Research Västmanland, Uppsala University, Västmanland  
19  
20 County Hospital, Västerås, Sweden.  
21

22 <sup>7</sup> Department of Clinical Sciences, Karolinska Institutet, Danderyd Hospital,  
23  
24 Stockholm, Sweden  
25

26  
27 <sup>8</sup> School of Medical Sciences, Faculty of Medicine, Örebro University, Örebro,  
28  
29 Sweden  
30

31 <sup>9</sup> Department of Internal Medicine, Danderyd Hospital, Stockholm, Sweden  
32

33 <sup>10</sup> Department of Infectious Diseases, Växjö Central Hospital, Växjö, Sweden  
34

35  
36 <sup>11</sup> Department in Geriatric Medicine at Karlskoga Hospital, Karlskoga, Sweden  
37

38 <sup>12</sup> At the time of the study: Department of Medicine (H7), Karolinska Institutet,  
39  
40 Stockholm, Sweden  
41

42  
43 <sup>13</sup> Department of Endocrinology, Karolinska University Hospital, Stockholm, Sweden  
44

45 <sup>14</sup> Department of Molecular Medicine and Surgery (K1), Karolinska Institutet,  
46  
47 Stockholm, Sweden  
48

49  
50 <sup>15</sup> Department of Infectious Diseases Halland County Hospital Halmstad, Halmstad,  
51  
52 Sweden  
53

54 <sup>16</sup> Department of Infectious Diseases, Visby Hospital, Visby, Sweden  
55

56  
57 <sup>17</sup> Department of Infectious Diseases, Östersund Hospital, Östersund, Sweden  
58  
59  
60

1  
2  
3 18 Department of Infectious Diseases, Karolinska University Hospital, Stockholm,  
4  
5 Sweden  
6  
7

8 Word count: 3288  
9

10  
11 Abstract word count: 250  
12  
13  
14  
15  
16  
17  
18  
19  
20  
21  
22  
23  
24  
25  
26  
27  
28  
29  
30  
31  
32  
33  
34  
35  
36  
37  
38  
39  
40  
41  
42  
43  
44  
45  
46  
47  
48  
49  
50  
51  
52  
53  
54  
55  
56  
57  
58  
59  
60

For peer review only



## Abstract

**Objective:** To assess the efficacy of inhaled ciclesonide in reducing the duration of oxygen therapy (an indicator of time to clinical improvement) among adults hospitalized with Covid-19.

**Design:** Multicenter, randomized, controlled, open-label trial.

**Setting:** 9 hospitals (3 academic hospitals and 6 non-academic hospitals) in Sweden between June 1, 2020, and May 17, 2021.

**Participants:** Adults hospitalized with Covid-19 and receiving oxygen therapy.

**Intervention:** Inhaled ciclesonide 320 µg twice daily for 14 days versus standard care.

**Main outcome measures:** Primary outcome was duration of oxygen therapy, an indicator of time to clinical improvement. Key secondary outcome was a composite of invasive mechanical ventilation/death.

**Results:** Data from 98 participants were analyzed (48 receiving ciclesonide and 50 receiving standard care; median (IQR) age, 59.5 (49-67) years; 67 (68%) male). Median (IQR) duration of oxygen therapy was 5.5 (3-9) days in the ciclesonide group and 4 (2-7) days in the standard care group (hazard ratio (HR) for termination of oxygen therapy 0.73 (95% CI 0.47-1.11), with the upper 95% CI being compatible with a 10% relative reduction in oxygen therapy duration, corresponding to a <1-day absolute reduction in a post-hoc calculation). Three participants in each group died/received invasive mechanical ventilation (HR 0.90 (95% CI 0.15-5.32)). The trial was discontinued early due to slow enrollment.

1  
2  
3 **Conclusions:** In hospitalized Covid-19 patients receiving oxygen therapy, this trial  
4 ruled out, with 0.95 confidence, a treatment effect of ciclesonide corresponding to  
5 more than a one-day reduction in duration of oxygen therapy. Ciclesonide is unlikely  
6 to improve this outcome meaningfully.  
7  
8  
9  
10  
11  
12  
13  
14  
15

### 16 **Strengths and limitations of this study**

- 17 • This was a multicenter, randomized, controlled, open-label trial comparing  
18 treatment with the inhaled corticosteroid ciclesonide 320 µg twice daily for 14  
19 days versus standard care.  
20
- 21 • Healthcare providers and participants were not blinded to treatment  
22 assignment.  
23
- 24 • The trial was terminated early due to slow recruitment.  
25  
26  
27  
28  
29  
30  
31  
32  
33  
34  
35  
36  
37  
38  
39  
40  
41  
42  
43  
44  
45  
46  
47  
48  
49  
50  
51  
52  
53  
54  
55  
56  
57  
58  
59  
60

## Introduction

Patients with Covid-19 can develop acute respiratory failure that may require invasive mechanical ventilation, associated with high mortality. The unregulated inflammation in the lungs, poor oxygenation and pulmonary infiltrates characterizing severe Covid-19 have been considered as a type of acute respiratory distress syndrome (ARDS).<sup>1 2</sup>

Prior to the Covid-19 pandemic, studies have indicated that inhaled corticosteroids may reduce the risk of ARDS. In a randomized controlled trial including 61 patients at risk of ARDS, none of the patients assigned to aerosolized budesonide/formoterol vs 7 assigned to placebo developed ARDS,<sup>3</sup> and 6 (20%) and 16 (53%) of the patients, respectively, received mechanical ventilation. In another trial including 60 patients with acute lung injury or ARDS, nebulized budesonide improved oxygenation and peak and plateau airway pressures, and reduced inflammatory markers.<sup>4</sup> Moreover, potentially protective and preventive effects of inhaled corticosteroids for ARDS is supported by animals models of lung injury,<sup>5-8</sup> and *in vitro* studies,<sup>9</sup> and it has been speculated that local administration of the drug in the lung may maximize therapeutic benefits with fewer systemic side effects, as compared with systemic steroids.<sup>3</sup>

Therefore, it could be hypothesized that inhaled corticosteroids may be beneficial for patients with severe Covid-19. The hypothesis is further supported by reports that inhaled corticosteroids reduce the epithelial expression of genes linked to SARS-CoV-2 entry into host cells.<sup>10 11</sup> Among the inhaled corticosteroids, ciclesonide has been identified as a particularly promising treatment as it can suppress replication of SARS-CoV-2 *in vitro*.<sup>12 13</sup>

1  
2  
3 While previous randomized controlled trials have assessed the effects of inhaled  
4  
5 budesonide<sup>14 15</sup> or ciclesonide<sup>16 17</sup> in non-hospitalized Covid-19 patients, no study  
6  
7 has been performed in hospitalized patients with more severe Covid-19.  
8  
9

10 This open-label randomized controlled trial investigated the effects of inhaled  
11  
12 ciclesonide, compared to standard care, in adult patients hospitalized with Covid-19  
13  
14 and requiring oxygen therapy.  
15  
16

## 21 **Methods**

### 24 *Study design*

25  
26  
27  
28 The HALT Covid-19 (inHALation of ciclesonide for Treatment of Covid-19) trial was a  
29  
30 multicenter, open-label randomized controlled trial to assess the efficacy and safety  
31  
32 of inhaled ciclesonide for the treatment of hospitalized patients with Covid-19  
33  
34 receiving oxygen therapy. The trial was conducted at 9 hospitals (3 academic  
35  
36 hospitals and 6 non-academic hospitals) in Sweden between June 1, 2020, and May  
37  
38 17, 2021.  
39  
40  
41  
42  
43

44 All participants provided written informed consent. The study was approved by the  
45  
46 Swedish Ethical Review Authority (Ethics committee number 2020-02183) and the  
47  
48 Swedish Medical Products Agency (Eudra-CT number 2020-001928-34) and  
49  
50 registered at [clinicaltrials.gov](https://clinicaltrials.gov) (NCT04381364).  
51  
52  
53

### 56 *Protocol changes and rationale*

57  
58  
59  
60

1  
2  
3  
4  
5 The trial was designed in the beginning of the Covid-19 pandemic. After trial initiation,  
6 treatments for, and hospitalization rates of, patients with Covid-19 changed rapidly.  
7  
8 Therefore, we made protocol changes (described in detail in the Online Appendix)  
9  
10 and the trial was stopped early.  
11  
12  
13  
14  
15  
16

17 In brief, we increased the number of study centers, removed the upper age limit ( $\leq 85$   
18 years) for patient inclusion, changed the inclusion criteria from  $\leq 48$  hours since  
19 hospital admission to  $\leq 48$  hours from initiation of oxygen therapy and allowed for  
20 patients to be included on the basis of a positive antigen test for SARS-Cov-2. All  
21 changes were approved by the Data Monitoring Committee, Ethical Review Authority  
22 and the Swedish Medical Products Agency and implemented from December 2020.  
23  
24  
25  
26  
27  
28  
29  
30  
31  
32

33 In June 2021, 99 patients had been included in the study, a large and increasing  
34 proportion of the adult Swedish population had received Covid-19 vaccination and  
35 hospitalizations for Covid-19 had dropped substantially. We determined that it was  
36 unlikely that the intended sample size would be reached and asked the Data  
37 Monitoring Committee to convene for a meeting. Following the recommendation of  
38 the Data Monitoring Committee, the study was terminated for futility to meet the  
39 targeted enrolment.  
40  
41  
42  
43  
44  
45  
46  
47  
48  
49  
50  
51

### 52 *Participants*

53  
54  
55  
56 Based on observations from Covid-19 patients treated at the study centers, we  
57 expected that 85% of the standard care group would survive and terminate oxygen  
58  
59  
60

1  
2  
3 therapy within 30 days (median 8 days). We considered a 25% (2 days) reduction in  
4 the duration of oxygen therapy to be a clinically meaningful effect. We estimated that  
5 such an effect could be detected with  $\alpha$  of 0.05, and 80% power if 446 participants  
6 (223 in each group) were enrolled.  
7  
8  
9  
10  
11  
12  
13  
14

15 Participants were eligible for inclusion if, they (1) were aged  $\geq 18$  years, (2) had a  
16 polymerase chain reaction confirmed SARS-CoV-2 infection or a positive SARS-CoV-  
17 2 antigen test from the upper respiratory tract, (3) were hospitalized at any of the  
18 study hospitals and (4) were receiving oxygen therapy, initiated within 48 hours  
19 before inclusion. Key exclusion criteria were ongoing treatment with inhaled or oral  
20 corticosteroids (previous use was accepted), oxygen therapy with  $>8$  L oxygen/min or  
21  $>50$  % oxygen on nasal high-flow cannula, and ongoing or expected intensive care or  
22 palliative care (Online Appendix).  
23  
24  
25  
26  
27  
28  
29  
30  
31  
32  
33  
34  
35

### 36 *Randomization*

37  
38 Patients were randomized 1:1 in blocks of 8, stratified by sex and hospital to receive  
39 ciclesonide or standard care. The randomization sequence was prepared by a  
40 statistician not involved in the trial. Treatment allocation was provided through a web-  
41 based interface. The participants and the physicians treating them were unblinded to  
42 the treatment assignment.  
43  
44  
45  
46  
47  
48  
49  
50  
51

### 52 *Intervention*

53  
54  
55 The treatment was 320  $\mu\text{g}$  of inhaled ciclesonide (80  $\mu\text{g}$  per actuation, for a total of 4  
56 actuations, or 160  $\mu\text{g}$  per actuation, for a total of 2 actuations) twice daily (total daily  
57 dose 640  $\mu\text{g}$ ) for 14 days. Ciclesonide was administered using a spacer (L'espace,  
58  
59  
60

1  
2  
3 Nordic Infucare, Stockholm Sweden). Participants randomized to ciclesonide  
4  
5 received written instructions, including pictures, and practical instructions on how to  
6  
7 use the inhalator and spacer; the first dose was taken under supervision. Ciclesonide  
8  
9 was then prescribed in the participant's electronic medical record and each given  
10  
11 dose during the hospitalization was recorded. Participants discharged before day 14  
12  
13 were instructed to continue the treatment at home for a total treatment duration of 14  
14  
15 days. Participants randomized to standard care did not receive any intervention  
16  
17 related to the study. Physicians treating the participants were not given any  
18  
19 restrictions concerning treatments during the study period. Participants who had been  
20  
21 discharged were contacted by telephone after day 30 for a follow-up interview.  
22  
23  
24  
25  
26  
27  
28

### 29 *Outcomes*

30  
31  
32 The primary outcome was duration of oxygen therapy (time to termination of oxygen  
33  
34 therapy in days) up to 30 days from randomization. Oxygen therapy was defined as  
35  
36 terminated on the day after which the patient did not receive oxygen therapy during  
37  
38 at least 48 hours, while being alive. This outcome corresponded to clinical  
39  
40 improvement for patients receiving oxygen therapy according to the World Health  
41  
42 Organization clinical progression scale.<sup>18</sup>  
43  
44  
45  
46  
47

48  
49 The key secondary outcome was a composite of invasive mechanical ventilation and  
50  
51 death up to 30 days after randomization. Other secondary outcomes were each  
52  
53 component of the key secondary outcome, admission to an intensive care unit,  
54  
55 discharge from the hospital and dyspnea in daily living at 30-35 days after  
56  
57 randomization as evaluated by the mMRC (Modified Medical Research Council)  
58  
59  
60

1  
2  
3 dyspnea scale. The scale ranges from 0 to 4 with a higher score indicating more  
4  
5 severe dyspnea.<sup>19 20</sup>  
6  
7  
8  
9

10 Data on serious adverse events<sup>21</sup> were collected by review of electronic medical  
11 records. Information about non-serious adverse events associated with ciclesonide  
12 use (dryness of mouth, nausea and oral candidiasis) was reported using a paper-  
13 based reporting form which was filled in by the treating physician. Information about  
14 non-serious adverse events occurring after hospital discharge was collected during  
15 the follow-up interview.  
16  
17  
18  
19  
20  
21  
22  
23  
24  
25

### 26 *Data collection*

27  
28  
29  
30 Patient characteristics at baseline (comorbidities, comedications, clinical parameters)  
31 and study outcomes were obtained from electronic medical records. Investigators  
32 contacted participants after day 30 after randomization to ask them about non-  
33 serious adverse events and dyspnea in daily living (study outcome) at day 30-35 after  
34 randomization.  
35  
36  
37  
38  
39  
40  
41  
42  
43  
44

### 45 *Statistical analysis*

46  
47  
48 According to the pre-specified analysis plan in the study protocol, the analyses were  
49 performed by an investigator who had not been involved in the enrolment of  
50 participants and was blinded to treatment assignment. An intention-to-treat  
51 population was used. In the analysis of the duration of oxygen therapy, participants  
52 were followed from randomization to termination of oxygen therapy, death, or 30 days  
53 after randomization. Kaplan Meier cumulative incidence curves were generated to  
54  
55  
56  
57  
58  
59  
60



1  
2  
3 illustrate the cumulative incidence of termination of oxygen therapy in the ciclesonide  
4 and standard care groups. A Cox proportional hazard regression model, adjusted for  
5  
6 and standard care groups. A Cox proportional hazard regression model, adjusted for  
7  
8 study hospital (Appendix Table 1), age (continuous variable) and sex was used to  
9  
10 estimate hazard ratios (HR) with 95% CI for time-to-event outcomes. Proportions and  
11  
12 the absolute risk difference with 95% CI were presented for binary outcomes. In a  
13  
14 per-protocol analysis of the primary outcome, participants assigned to ciclesonide  
15  
16 were censored at the time of discontinuing treatment. The median mMRC score was  
17  
18 compared using the Kruskal-Wallis test. A logistic regression model adjusted for  
19  
20 study hospital, age and sex was used to compare the likelihood of reporting a mMRC  
21  
22 score of 0 (dyspnea only with strenuous exercise).  
23  
24  
25  
26  
27  
28  
29

30 In an analysis that was not pre-specified, we additionally adjusted the primary  
31  
32 outcome analysis for baseline variables, including days since symptom onset, c-  
33  
34 reactive protein and white blood count (as continuous variables), and diabetes  
35  
36 mellitus, hypertension and hyperlipidemia.  
37  
38

39 95% CIs of ratios not including 1 and 95% CIs for absolute risk differences not  
40  
41 including 0 were considered statistically significant. Secondary outcome analyses  
42  
43 were considered hypothesis-generating and no adjustment for multiple testing was  
44  
45 made. Analyses were performed using Stata version 16.1 (StataCorp).  
46  
47  
48  
49  
50  
51

### 52 *Patient and Public involvement*

53  
54  
55 No patients were involved in setting the research question, nor in the design,  
56  
57 conduct, or interpretation of the study.  
58  
59  
60

## Results

Of the 99 participants who underwent randomization 48 were assigned to receive ciclesonide and 51 to standard care (Figure 1). One participant in the standard care group withdrew consent and was excluded from the analysis. Ninety-eight patients (48 in the ciclesonide group and 50 in the standard care group) were included in the final analysis. All participants assigned to ciclesonide received the treatment at least once. None of the participants were lost to follow-up. The median age of participants was 59.5 (IQR 49, 67) years, 68% were men and the median duration of symptoms was 9 (IQR 8, 11) days. There were no relevant between-group differences in demographic characteristics, laboratory test results or comorbidities at enrollment (Table 1).

**Table 1** Demographic and clinical characteristics of participants at study enrolment.

|                                                      | <b>Total (n=98)</b> | <b>Ciclesonide (n=48)</b> | <b>Standard care (n=50)</b> |
|------------------------------------------------------|---------------------|---------------------------|-----------------------------|
| Age, median (IQR)                                    | 59.5 (49, 67)       | 61 (49, 67)               | 59 (49, 67)                 |
| Age ≥70 years, n (%)                                 | 78 (80)             | 37 (77)                   | 41 (82)                     |
| Men, n (%)                                           | 67 (68)             | 34 (71)                   | 33 (66)                     |
| Days since symptom onset, median (IQR)               | 9 (8, 11)           | 9 (7.5, 11.5)             | 10 (8, 11)                  |
| Days since symptom onset: <10 days, n (%)            | 51 (52)             | 27 (56)                   | 24 (48)                     |
| Body mass index in kg/m <sup>2</sup> , median (IQR)  | 29.7 (25.6, 34.0)   | 28.7 (25.4, 34.0)         | 30.6 (26.8, 34.3)           |
| Oxygen flow of oxygen therapy in L/min, median (IQR) | 2 (1, 3)            | 2 (1, 3)                  | 2 (1, 2)                    |
| Respiratory rate per minute, median (IQR)            | 20 (18, 24)         | 20 (19, 25)               | 20 (18, 23)                 |
| C-reactive protein in mg/L, median (IQR)             | 100 (56, 142)       | 103 (62, 164)             | 91.5 (45.5, 124.5)          |

|                                                  |                |                |                |
|--------------------------------------------------|----------------|----------------|----------------|
| White cell count in $\times 10^9/L$ , median IQR | 5.7 (4.5, 7.0) | 5.3 (4.3, 6.9) | 6.1 (4.9, 7.0) |
| eGFR in mL/min/1.73m <sup>2</sup> , median (IQR) | 83 (70.5, 90)  | 81.5 (70, 90)  | 87 (73, 90)    |
| <b>Coexisting conditions, n (%)</b>              |                |                |                |
| Diabetes mellitus                                | 18 (18)        | 8 (17)         | 10 (20)        |
| Hypertension <sup>a</sup>                        | 45 (46)        | 22 (46)        | 23 (46)        |
| Hyperlipidemia <sup>b</sup>                      | 27 (28)        | 12 (25)        | 15 (30)        |
| Chronic obstructive lung disease                 | 3 (3)          | 1 (2)          | 2 (4)          |
| Asthma                                           | 8 (8)          | 6 (13)         | 2 (4)          |
| Current smoker                                   | 12 (12)        | 6 (13)         | 6 (12)         |
| Ischemic heart disease                           | 8 (8)          | 2 (4)          | 6 (12)         |
| Heart failure                                    | 3 (3)          | 2 (4)          | 1 (2)          |
| Atrial fibrillation                              | 5 (5)          | 3 (6)          | 2 (4)          |
| Cancer                                           | 10 (10)        | 5 (10)         | 5 (10)         |
| Chronic kidney disease                           | 9 (9)          | 5 (10)         | 4 (8)          |

<sup>a</sup> Diagnosis of hypertension or use of antihypertensive drugs

<sup>b</sup> Diagnosis of hyperlipidemia or use of lipid lowering therapy

Missing values were: n=1 for days since symptom onset, n=20 for body mass index, n=1 for oxygen flow of oxygen therapy, n=1 for body temperature, n=1 for heart rate, n=3 for respiratory rate, n=3 for C-reactive protein, n=7 for white cell count and n=22 for eGFR.

eGFR: estimated glomerular filtration rate

The results of primary and secondary outcome analyses are presented in Table 2.

Kaplan-Meier estimates of the median duration of oxygen therapy were 5.5 (IQR 3, 9) days in the ciclesonide group and 4 (2, 7) days in the standard care group. (Figure 2).

The HR for termination of oxygen therapy during 30 days following randomization, used to compare ciclesonide vs standard care, showed that ciclesonide treatment was not statistically significantly associated with the duration of oxygen therapy (0.73 (95% CI 0.47 to 1.11)).

1  
2  
3 The research question that we aimed to assess was whether inhaled ciclesonide, as  
4 compared with standard care, could reduce the time to clinical improvement (as  
5 indicated by duration of oxygen therapy). While the interpretation of statistically non-  
6 significant findings is a recurring and well-known subject of debate in the medical  
7 literature, it is generally not recommended to use a binary interpretation based on an  
8 arbitrary cut-off for statistical significance<sup>22-25</sup>. This is particularly important in this trial  
9 as it was terminated early and thereby underpowered to assess its primary outcome.  
10 However, it has been suggested that in trials with statistically non-significant findings,  
11 the 95% CIs should be used to rule in or rule out potential effect sizes of the  
12 intervention. In this study, we therefore assessed the largest benefit of ciclesonide  
13 that was compatible with the confidence interval. Such a benefit was represented by  
14 the upper limit of the HR for time to termination of oxygen therapy (a higher HR  
15 indicates shorter duration of oxygen therapy for the ciclesonide group), i.e., 1.11. We  
16 took the inverse of this HR ( $1/1.11 = 0.90$ ) to calculate the relative reduction in  
17 duration of oxygen therapy that the HR was compatible with (i.e.,  $1-0.90 = 10\%$   
18 relative reduction). We then multiplied this 10% relative reduction with the absolute  
19 duration of oxygen therapy in the standard care group to calculate the corresponding  
20 absolute difference in duration of oxygen therapy ( $10\% * 4 \text{ days} = 0.4 \text{ days}$ , which is  
21  $<1 \text{ day}$ ). Given the pre-specified minimally clinically important difference of 2 days  
22 (which was used for the power calculation of the study), we deemed this best-case  
23 difference to be clinically irrelevant.

24  
25  
26  
27  
28  
29  
30  
31  
32  
33  
34  
35  
36  
37  
38  
39  
40  
41  
42  
43  
44  
45  
46  
47  
48  
49  
50  
51  
52  
53  
54  
55 In the per-protocol analysis, the HR for termination of oxygen therapy during 30 days  
56 following randomization was 0.79 (95% CI 0.51 to 1.23). In the additionally adjusted  
57  
58  
59  
60

analysis (Appendix table 2) the HR for termination of oxygen therapy was 0.68 (95% CI 0.43 to 1.09) (Table 2).

**Table 2** Outcomes. All outcomes are recorded during 30 days following randomization unless otherwise indicated.

|                                                                     | <b>Ciclesonide</b> | <b>Standard care</b> | <b>Difference<sup>a</sup></b> |
|---------------------------------------------------------------------|--------------------|----------------------|-------------------------------|
| <b>Primary outcome</b>                                              |                    |                      |                               |
| Duration of oxygen therapy, median (IQR) days                       | 5.5 (3, 9)         | 4 (2, 7)             | 0.73 (0.47 to 1.11)           |
| <b>Key secondary outcome</b>                                        |                    |                      |                               |
| Death or invasive mechanical ventilation, n (%)                     | 3 (6)              | 3 (6)                | 0 (-9 to 10)                  |
| Time to death or invasive mechanical ventilation, median (IQR) days | 2 (2, 10)          | 4 (2, 7)             | 0.90 (0.15 to 5.32)           |
| <b>Secondary outcomes</b>                                           |                    |                      |                               |
| Death, n (%)                                                        | 2 (4)              | 1 (2)                | -                             |
| Invasive mechanical ventilation, n (%)                              | 1 (2)              | 3 (6)                | -                             |
| Admission to an intensive care unit, n (%)                          | 4 (8)              | 4 (8)                | -                             |
| mMRC dyspnea scale score at day 30-35, median (IQR) <sup>b</sup>    | 3 (2, 4)           | 3 (2, 4)             | 0.97                          |
| mMRC dyspnea scale score 0 at day 30-35, n (%) <sup>b</sup>         | 4 (9)              | 7 (15)               | 0.48 (0.11 to 2.04)           |
| <b>Per protocol analysis<sup>c</sup></b>                            |                    |                      |                               |
| Duration of oxygen therapy, median (IQR) days                       | 5 (3, 9)           | 4 (2, 7)             | 0.79 (0.51 to 1.23)           |
| <b>Additionally adjusted analysis<sup>d</sup></b>                   |                    |                      |                               |
| Duration of oxygen therapy, median (IQR) days                       | 5 (3, 9)           | 4.5 (2, 7)           | 0.68 (0.43 to 1.09)           |

<sup>a</sup>. Differences are expressed as hazard ratios (95% CI) estimated using a Cox proportional hazards model for time to event outcomes and as absolute risk difference (95% CI) in percent for outcomes of absolute risk. The comparison of the mMRC dyspnea score was done using the Kruskal-Wallis test and the difference is expressed as a p-value. The comparison of the likelihood of reporting a mMRC score of 0 was done using a logistic regression model and the difference is expressed as an odds ratio (95% CI). Statistical testing for differences in proportions and time-to-event analyses were not performed for the secondary outcome events, including death, invasive mechanical ventilation, and admission to an intensive care unit due to few events.

1  
2  
3 <sup>b</sup>. Not including 1 participant in the standard care group and 2 participants in the ciclesonide group who died within  
4 30 days of randomization and 1 participant in the standard care group and 1 participant in the ciclesonide group with  
5 missing data on this outcome.  
6  
7

8  
9 <sup>c</sup>. In the per-protocol analysis for duration of oxygen therapy, patients assigned to ciclesonide were censored at the  
10 time of discontinuing treatment.  
11

12  
13 <sup>d</sup>. In addition to age, sex and study center, this analysis of duration of oxygen therapy was adjusted for days since  
14 symptom onset, c-reactive protein, white blood count (as continuous variables) and diabetes mellitus, hypertension  
15 and hyperlipidemia (as categorical variables). The analyses included n=46 in the standard care group and n=45 in the  
16 ciclesonide group without missing data on any of the variables included in the model.  
17  
18  
19

20  
21  
22  
23  
24 In total, 3 (6%) participants assigned to ciclesonide and 3 (6%) participants assigned  
25 to standard care experienced the key secondary outcome of mechanical invasive  
26 ventilation or death (absolute difference 0% (95% CI -10 to 9%; HR 0.90 (95% CI  
27 0.15 to 5.32)). Median mMRC dyspnea score at 30-35 days after randomization was  
28 3 (IQR 2, 4) in both groups (p-value for difference 0.97) (Table 2).  
29  
30  
31  
32  
33  
34  
35  
36  
37

38  
39 There were no apparent differences between the groups in treatments that  
40 participants received after randomization (Table 3); 26 (54%) of the participants  
41 assigned to ciclesonide and 22 (44%) of the participants in the standard care group  
42 received treatment with systemic corticosteroids after randomization.  
43  
44  
45  
46  
47  
48  
49

50  
51 Few serious adverse clinical events occurred during the study. The most frequently  
52 reported adverse event was dry mouth (7 (15%) participants in the ciclesonide group  
53 and 11 (22%) participants in the standard care group). Two participants assigned to  
54 ciclesonide and 0 in the placebo group reported that they experienced oral  
55  
56  
57  
58  
59  
60

candidiasis (Table 3).

**Table 3** Participants' treatments and adverse clinical events through day 30 after randomization.

|                                          | <b>Ciclesonide</b><br>(n=48) | <b>Standard care</b><br>(n=50) |
|------------------------------------------|------------------------------|--------------------------------|
| <b>Received treatment, n (%)</b>         |                              |                                |
| Systemic corticosteroids                 | 26 (54)                      | 22 (44)                        |
| Remdesivir                               | 4 (8)                        | 5 (10)                         |
| Low-molecular-weight heparin             | 45 (94)                      | 45 (90)                        |
| Oral anticoagulants                      | 32 (67)                      | 30 (60)                        |
| Vasopressors                             | 4 (8)                        | 3 (6)                          |
| Non-invasive mechanical ventilation      | 8 (17)                       | 7 (14)                         |
| <b>Serious clinical events, n (%)</b>    |                              |                                |
| Renal failure                            | 2 (4)                        | 3 (6)                          |
| Cardiac arrest                           | 1 (2)                        | 0 (0)                          |
| New onset atrial fibrillation            | 0 (0)                        | 1 (2)                          |
| Pulmonary embolism                       | 4 (8)                        | 2 (4)                          |
| Other thromboembolic events              | 0 (0)                        | 1 (2)                          |
| Sepsis                                   | 3 (6)                        | 2 (4)                          |
| Other serious event                      | 1 (2)                        | 0 (0)                          |
| <b>Non-serious adverse events, n (%)</b> |                              |                                |
| Nausea                                   | 6 (13)                       | 8 (16)                         |
| Dry mouth                                | 7 (15)                       | 11 (22)                        |
| Oral candidiasis                         | 2 (4)                        | 0 (0)                          |
| Other non-serious adverse event          | 3 (6)                        | 1 (2)                          |

1  
2  
3 Some pre-specified analyses were not performed due to small sample size or low  
4  
5 number of events. These included statistical testing of differences in proportions and  
6  
7 time-to-event analyses for non-key secondary outcomes, including death, invasive  
8  
9 mechanical ventilation, and admission to an intensive care unit; the secondary  
10  
11 outcome analyses of discharge from hospital; subgroup analyses, and the primary  
12  
13 outcome analysis after exclusion of participants who received invasive mechanical  
14  
15 ventilation or died.  
16  
17  
18  
19  
20  
21

## 22 Discussion

23  
24  
25  
26  
27 In this randomized open-label, controlled trial, including 98 hospitalized Covid-19  
28  
29 patients with ongoing oxygen therapy, treatment with inhaled ciclesonide did not  
30  
31 result in a statistically significant reduction in the duration of oxygen therapy, used as  
32  
33 a measure of time to clinical improvement. The trial ruled out, with 0.95 confidence,  
34  
35 treatments effects of ciclesonide corresponding to more than a one-day reduction in  
36  
37 duration of oxygen therapy.  
38  
39  
40  
41  
42

43 While previous randomized controlled trials have assessed effects of inhaled  
44  
45 corticosteroids, including budesonide<sup>14 15</sup> and ciclesonide<sup>16 17</sup>, in non-hospitalized  
46  
47 patients with Covid-19, this is the first trial that includes hospitalized patients with  
48  
49 more severe forms of the disease. In contrast to our hypothesis, the median duration  
50  
51 of oxygen therapy was nominally longer among patients assigned to ciclesonide vs  
52  
53 standard care (5.5 vs 4 days; HR for termination of oxygen therapy 0.73 (95% CI  
54  
55 0.47 to 1.11)). As such, the 95% CI indicates that,<sup>24</sup> even in the best case,  
56  
57 ciclesonide may reduce the duration of oxygen therapy with only 10% (1-1/1.11; less  
58  
59  
60



1  
2  
3 than 1 day in our study) while it may in the worst case result in an over 2-fold  
4  
5 increase. Thus, the results of this trial indicate that ciclesonide is unlikely to provide a  
6  
7 clinically meaningful beneficial effect on the duration of oxygen therapy in  
8  
9 hospitalized Covid-19 patients receiving oxygen therapy.  
10  
11  
12  
13

14 To date, 2 randomized controlled trials of ciclesonide in non-hospitalized patients with  
15  
16 Covid-19 have been presented. In the CONTAIN study,<sup>16</sup> which was terminated early  
17  
18 due to slow recruitment, 215 non-hospitalized patients with a median of 3 days  
19  
20 symptom duration were randomized to combination treatment with intranasal and  
21  
22 inhaled ciclesonide or placebo. No statistically significant difference between the  
23  
24 groups was observed for the primary endpoint, resolution of respiratory symptoms at  
25  
26 day 7 after randomization, which was reached by 40% of the patients in the treatment  
27  
28 group vs 35% in the placebo group (adjusted risk difference of 5.5% (95% CI -7.8%  
29  
30 to 18.8%).<sup>16</sup> Six (6%) patients assigned to ciclesonide vs 3 (3%) in the placebo group  
31  
32 were hospitalized within 14 days; none died. In another clinical trial of ciclesonide,  
33  
34 including 400 non-hospitalized patients with Covid-19,<sup>17</sup> randomization to ciclesonid  
35  
36 vs placebo did not result in a reduced time to alleviation of all Covid-19 related  
37  
38 symptoms. However, in secondary outcome analyses, patients assigned to  
39  
40 ciclesonide had fewer emergency department visits or hospital admissions for  
41  
42 reasons related to COVID-19 (odds ratio, 0.18, 95% CI, 0.04 to 0.85).  
43  
44  
45  
46  
47  
48  
49  
50

51 In addition, 2 randomized clinical trials of the inhaled corticosteroid budesonide in  
52  
53 non-hospitalized patients with Covid-19 have been presented. The STOIC trial was  
54  
55 an open-label trial comparing inhaled budesonide vs standard care in 146 Covid-19  
56  
57 patients with mild symptoms.<sup>14</sup> Compared to standard care, budesonide treatment  
58  
59  
60

1  
2  
3 led to a statistically significant reduction in Covid-19-related emergency department  
4 assessment and hospitalization (difference in proportions 0.123 (95% CI 0.043 to  
5 0.218)).<sup>14</sup> Furthermore, budesonide treatment was associated with 1 day shorter time  
6 to clinical recovery. The PRINCIPLE trial was another open-label trial that included  
7 4700 primary care patients at high risk of developing severe Covid-19 (1073  
8 randomized to budesonide treatment; 1988 to standard care; 1639 to other  
9 treatments).<sup>15</sup> Compared to standard care, randomization to budesonide led to a  
10 shorter time to self-reported recovery (difference 2.94 days (95% Bayesian credible  
11 interval 1.19 to 5.12) and a reduced likelihood of hospital admission or death,  
12 although the results for the latter outcomes did not meet the superiority threshold.  
13  
14  
15  
16  
17  
18  
19  
20  
21  
22  
23  
24  
25  
26  
27

28 Taken together, the previous studies indicate that inhaled corticosteroids might be  
29 useful for preventing deterioration of Covid-19 in non-hospitalized patients with mild  
30 symptoms. It is possible that the low likelihood of benefit associated with ciclesonide  
31 treatment observed in our study reflects the more severe pulmonary inflammation in  
32 our study population, as indicated by the need for hospitalization with oxygen therapy  
33 and a median symptom duration of 9 days: at such stages of disease progression, it  
34 could be speculated that pulmonary administration of corticosteroids may not suffice  
35 to confer benefit and that systemic treatment is needed. Accordingly, in the Recovery  
36 trial of hospitalized Covid-19 patients,<sup>26</sup> dexamethasone treatment reduced risk of  
37 death and the time to discharge from hospital, with these benefits primarily being  
38 observed among patients receiving oxygen therapy or invasive mechanical ventilation  
39 at baseline.  
40  
41  
42  
43  
44  
45  
46  
47  
48  
49  
50  
51  
52  
53  
54  
55  
56  
57

58 Similar to other clinical trials including patients with Covid-19,<sup>15 26 27</sup> we used a  
59  
60

1  
2  
3 pragmatic, open-label design. With this design, we intended to assess the effect of  
4  
5 adding ciclesonide to standard care, rather than to examine the effect of ciclesonide  
6  
7 compared to placebo. The research question that our study aimed to answer was  
8  
9 “what is the effect of using ciclesonide as an addition to standard care as compared  
10  
11 with standard care alone?” While this is a research question of relevance to clinical  
12  
13 decision-making, the open-label design and the possible expectations of effect  
14  
15 among both patients<sup>28</sup> and physicians might have affected the outcomes in our study,  
16  
17 including when to terminate oxygen therapy. Another limitation of our study is that we  
18  
19 were unable to recruit the intended number of patients due to the substantial  
20  
21 decrease in hospitalized Covid-19 patients in Sweden during 2021. Importantly, the  
22  
23 study could not provide much information regarding the key secondary outcome of  
24  
25 death or invasive mechanical intervention. Further research in hospitalized Covid-19  
26  
27 patients is needed to determine the potential effect of ciclesonide treatment on these  
28  
29 outcomes. Moreover, it is a possibility that effects of ciclesonide differ as compared to  
30  
31 other inhaled corticosteroids (e.g., budesonide). Patients were instructed to use  
32  
33 ciclesonide without a spacer after discharge from the hospital; this may have affected  
34  
35 drug delivery. Finally, results from the Recovery Trial were released 5 weeks after the  
36  
37 initiation of our study and around half of the patients in both the ciclesonide group  
38  
39 and the control group received systemic corticosteroids after randomization. Further  
40  
41 studies would be needed to assess the comparative effectiveness and safety of  
42  
43 ciclesonide vs systemic corticosteroids.  
44  
45  
46  
47  
48  
49  
50  
51  
52

## 53 **Conclusions**

54  
55  
56 In this open-label randomized controlled trial in patients hospitalized with Covid-19  
57  
58 and receiving oxygen therapy, the findings indicated that treatment with ciclesonide  
59  
60

1  
2  
3 vs standard care is unlikely to result in a clinically meaningful reduction in the  
4  
5 duration of oxygen therapy.  
6  
7  
8  
9

## 10 11 **Acknowledgements**

12  
13  
14 We would like to thank the following individuals that did not qualify for authorship but  
15  
16 contributed to the study: Dr Oscar Bakhouch (Skaraborg Hospital), Dr Eva-Marie  
17  
18 Boman and Dr Anders Lundqvist (Southern Älvsborg Hospital).  
19  
20  
21  
22  
23

## 24 **Contributorship statement**

25  
26  
27  
28 DB, PU, PT, OB and DPA conceived the study and were responsible for the  
29  
30 methods. OB and DPA were responsible for the study conduct. DB, PU, OB and DPA  
31  
32 were responsible for the financing. PT validated the data. PU performed the main  
33  
34 analysis. DPA, PU and PT wrote the original draft of the manuscript. All authors  
35  
36 wrote, reviewed, and edited the manuscript. OB and DPA supervised the study. DB,  
37  
38 DPA, PU, PT and OB were responsible for administration of the project. DPA and OB  
39  
40 are the guarantors. DB, PT, AK, EW, SA, SW, OE, AN, AE, JG, JEK, SB, CU, ML,  
41  
42 BJ, JL, JLI, JH, OB and DPA enrolled participants in the study. The corresponding  
43  
44 author attests that all listed authors meet authorship criteria and that no others  
45  
46 meeting the criteria have been omitted.  
47  
48  
49  
50  
51  
52  
53

## 54 **Competing interests**

55  
56 This study received non-financial support from COVIS Pharma (study drug donation).  
57  
58 The authors have no conflict of interest to disclose.  
59  
60

## Funding/Support

This study was funded by the Swedish Heart and Lung Foundation (Number 20200421), The Axel and Margaret Ax:son Johnson Foundation (N/A), CIMED (N/A), and Strategic Research Program at Karolinska Institutet (Number 961507), the Stockholm County Council (Number: 954970, 963296, 962029), and the Västmanland County Council (Grant nr LTV-938409). PU was supported by grants from the Strategic Research Program in Epidemiology at Karolinska Institutet (N/A), and a Faculty Funded Career Position at Karolinska Institutet (N/A).

The funders had no role in the study design, conduct, collection, management, analysis, interpretation of data, writing or reviewing the manuscript or decision to submit the manuscript for publication. The study drug was donated by COVIS Pharma but COVIS pharma did not participate in any other part of the study.

## Data sharing statement

Data are available upon reasonable request

## Ethics Approval

All participants provided written informed consent. The study was approved by the Swedish Ethical Review Authority (Ethics committee number 2020-02183) and the Swedish Medical Products Agency (Eudra-CT number 2020-001928-34) and registered at [clinicaltrials.gov](http://clinicaltrials.gov) (NCT04381364).

## References

- 1  
2  
3  
4 1. Gibson PG, Qin L, Pua SH. COVID-19 acute respiratory  
5  
6 distress syndrome (ARDS): clinical features and  
7  
8 differences from typical pre-COVID-19 ARDS. *Med J Aust*  
9  
10 2020;213(2):54-56 e1. doi: 10.5694/mja2.50674 [published  
11  
12 Online First: 2020/06/24]  
13  
14
- 15 2. Bos LDJ. COVID-19-related Acute Respiratory Distress  
16  
17 Syndrome: Not So Atypical. *Am J Respir Crit Care Med*  
18  
19 2020;202(4):622-24. doi: 10.1164/rccm.202004-1423LE  
20  
21 [published Online First: 2020/06/25]  
22  
23
- 24 3. Festic E, Carr GE, Cartin-Ceba R, et al. Randomized Clinical  
25  
26 Trial of a Combination of an Inhaled Corticosteroid and  
27  
28 Beta Agonist in Patients at Risk of Developing the Acute  
29  
30 Respiratory Distress Syndrome. *Crit Care Med*  
31  
32 2017;45(5):798-805. doi:  
33  
34 10.1097/CCM.0000000000002284 [published Online First:  
35  
36 2017/02/28]  
37  
38
- 39 4. Mohamed HS, Meguid MM. Effect of nebulized budesonide  
40  
41 on respiratory mechanics and oxygenation in acute lung  
42  
43 injury/acute respiratory distress syndrome: Randomized  
44  
45 controlled study. *Saudi J Anaesth* 2017;11(1):9-14. doi:  
46  
47 10.4103/1658-354X.197369 [published Online First:  
48  
49 2017/02/22]  
50  
51
- 52 5. Jansson AH, Eriksson C, Wang X. Effects of budesonide and  
53  
54 N-acetylcysteine on acute lung hyperinflation, inflammation  
55  
56 and injury in rats. *Vascul Pharmacol* 2005;43(2):101-11.  
57  
58  
59  
60

1  
2  
3  
4 doi: 10.1016/j.vph.2005.03.006 [published Online First:  
5  
6 2005/06/22]  
7

- 8  
9 6. Forsgren PE, Modig JA, Dahlback CM, et al. Prophylactic  
10 treatment with an aerosolized corticosteroid liposome in a  
11 porcine model of early ARDS induced by endotoxaemia.  
12  
13 *Acta Chir Scand* 1990;156(6-7):423-31. [published Online  
14  
15 First: 1990/06/01]  
16  
17  
18  
19  
20 7. Wang J, Zhang L, Walther SM. Administration of aerosolized  
21  
22 terbutaline and budesonide reduces chlorine gas-induced  
23  
24 acute lung injury. *J Trauma* 2004;56(4):850-62. doi:  
25  
26 10.1097/01.ta.0000078689.45384.8b [published Online  
27  
28 First: 2004/06/10]  
29  
30  
31  
32 8. Walther S, Jansson I, Berg S, et al. Pulmonary granulocyte  
33  
34 accumulation is reduced by nebulized corticosteroid in  
35  
36 septic pigs. *Acta Anaesthesiol Scand* 1992;36(7):651-5.  
37  
38 doi: 10.1111/j.1399-6576.1992.tb03537.x [published  
39  
40 Online First: 1992/10/01]  
41  
42  
43  
44 9. Yamaya M, Nishimura H, Deng X, et al. Inhibitory effects of  
45  
46 glycopyrronium, formoterol, and budesonide on  
47  
48 coronavirus HCoV-229E replication and cytokine  
49  
50 production by primary cultures of human nasal and  
51  
52 tracheal epithelial cells. *Respir Investig* 2020;58(3):155-68.  
53  
54 doi: 10.1016/j.resinv.2019.12.005 [published Online First:  
55  
56 2020/02/26]  
57  
58  
59  
60

- 1  
2  
3  
4 10. Peters MC, Sajuthi S, Deford P, et al. COVID-19-related  
5 Genes in Sputum Cells in Asthma. Relationship to  
6 Demographic Features and Corticosteroids. *Am J Respir*  
7 *Crit Care Med* 2020;202(1):83-90. doi:  
8 10.1164/rccm.202003-0821OC [published Online First:  
9 2020/04/30]  
10  
11  
12  
13  
14  
15  
16  
17  
18 11. Milne S, Li X, Yang CX, et al. Inhaled corticosteroids  
19 downregulate SARS-CoV-2-related genes in COPD:  
20 results from a randomised controlled trial. *Eur Respir J*  
21 2021;58(1) doi: 10.1183/13993003.00130-2021 [published  
22 Online First: 2021/04/03]  
23  
24  
25  
26  
27  
28  
29 12. Jeon S, Ko M, Lee J, et al. Identification of Antiviral Drug  
30 Candidates against SARS-CoV-2 from FDA-Approved  
31 Drugs. *Antimicrob Agents Chemother* 2020;64(7) doi:  
32 10.1128/AAC.00819-20 [published Online First:  
33 2020/05/06]  
34  
35  
36  
37  
38  
39  
40  
41 13. Kimura H, Kurusu H, Sada M, et al. Molecular  
42 pharmacology of ciclesonide against SARS-CoV-2. *J*  
43 *Allergy Clin Immunol* 2020;146(2):330-31. doi:  
44 10.1016/j.jaci.2020.05.029 [published Online First:  
45 2020/07/01]  
46  
47  
48  
49  
50  
51  
52 14. Ramakrishnan S, Nicolau DV, Jr., Langford B, et al. Inhaled  
53 budesonide in the treatment of early COVID-19 (STOIC): a  
54 phase 2, open-label, randomised controlled trial. *Lancet*  
55  
56  
57  
58  
59  
60



- 1  
2  
3  
4       *Respir Med* 2021;9(7):763-72. doi: 10.1016/S2213-  
5       2600(21)00160-0 [published Online First: 2021/04/13]  
6  
7  
8  
9       15. Yu LM, Bafadhel M, Dorward J, et al. Inhaled budesonide  
10       for COVID-19 in people at high risk of complications in the  
11       community in the UK (PRINCIPLE): a randomised,  
12       controlled, open-label, adaptive platform trial. *Lancet*  
13       2021;398(10303):843-55. doi: 10.1016/S0140-  
14       6736(21)01744-X [published Online First: 2021/08/14]  
15  
16  
17  
18  
19  
20  
21  
22       16. Ezer N, Belga S, Daneman N, et al. Inhaled and intranasal  
23       ciclesonide for the treatment of covid-19 in adult  
24       outpatients: CONTAIN phase II randomised controlled trial.  
25       *BMJ* 2021;375:e068060. doi: 10.1136/bmj-2021-068060  
26       [published Online First: 2021/11/04]  
27  
28  
29  
30  
31  
32  
33  
34       17. Clemency BM, Varughese R, Gonzalez-Rojas Y, et al.  
35       Efficacy of Inhaled Ciclesonide for Outpatient Treatment of  
36       Adolescents and Adults With Symptomatic COVID-19: A  
37       Randomized Clinical Trial. *JAMA Intern Med* 2021 doi:  
38       10.1001/jamainternmed.2021.6759 [published Online First:  
39       2021/11/23]  
40  
41  
42  
43  
44  
45  
46  
47  
48       18. Characterisation WHOWGotC, Management of C-i. A  
49       minimal common outcome measure set for COVID-19  
50       clinical research. *Lancet Infect Dis* 2020;20(8):e192-e97.  
51       doi: 10.1016/S1473-3099(20)30483-7 [published Online  
52       First: 2020/06/17]  
53  
54  
55  
56  
57  
58  
59  
60

- 1  
2  
3  
4 19. Mahler DA, Wells CK. Evaluation of clinical methods for  
5 rating dyspnea. *Chest* 1988;93(3):580-6. doi:  
6 10.1378/chest.93.3.580 [published Online First:  
7 1988/03/01]  
8  
9  
10  
11  
12  
13 20. Bestall JC, Paul EA, Garrod R, et al. Usefulness of the  
14 Medical Research Council (MRC) dyspnoea scale as a  
15 measure of disability in patients with chronic obstructive  
16 pulmonary disease. *Thorax* 1999;54(7):581-6. doi:  
17 10.1136/thx.54.7.581 [published Online First: 1999/06/22]  
18  
19  
20  
21  
22  
23  
24  
25 21. Directive 2001/20/EC of the European Parliament and of the  
26 Council of 4 April 2001 on the approximation of the laws,  
27 regulations and administrative provisions of the member  
28 states relating to the implementation of good clinical  
29 practice in the conduct of clinical trials on medicinal  
30 products for human use. *Med Etika Bioet* 2002;9(1-2):12-9.  
31 [published Online First: 2005/11/10]  
32  
33  
34  
35  
36  
37  
38  
39  
40  
41 22. Altman DG, Bland JM. Absence of evidence is not evidence  
42 of absence. *BMJ* 1995;311(7003):485. doi:  
43 10.1136/bmj.311.7003.485 [published Online First:  
44 1995/08/19]  
45  
46  
47  
48  
49  
50 23. Harrell F. Statistical Errors in the Medical Literature.  
51 Statistical Thinking.  
52 <https://www.fharrell.com/post/errmed/index.html> (accessed  
53 Oct 24, 2022). ed, 2017.  
54  
55  
56  
57  
58  
59  
60

- 1  
2  
3  
4 24. Hawkins AT, Samuels LR. Use of Confidence Intervals in  
5  
6 Interpreting Nonstatistically Significant Results. *JAMA*  
7  
8 2021;326(20):2068-69. doi: 10.1001/jama.2021.16172  
9  
10 [published Online First: 2021/11/24]  
11  
12  
13 25. Greenland S, Senn SJ, Rothman KJ, et al. Statistical tests,  
14  
15 P values, confidence intervals, and power: a guide to  
16  
17 misinterpretations. *Eur J Epidemiol* 2016;31(4):337-50.  
18  
19 doi: 10.1007/s10654-016-0149-3 [published Online First:  
20  
21 2016/05/23]  
22  
23  
24 26. Group RC, Horby P, Lim WS, et al. Dexamethasone in  
25  
26 Hospitalized Patients with Covid-19. *N Engl J Med*  
27  
28 2021;384(8):693-704. doi: 10.1056/NEJMoa2021436  
29  
30 [published Online First: 2020/07/18]  
31  
32  
33 27. Investigators R-C, Gordon AC, Mouncey PR, et al.  
34  
35 Interleukin-6 Receptor Antagonists in Critically Ill Patients  
36  
37 with Covid-19. *N Engl J Med* 2021;384(16):1491-502. doi:  
38  
39 10.1056/NEJMoa2100433 [published Online First:  
40  
41 2021/02/26]  
42  
43  
44 28. Wechsler ME, Kelley JM, Boyd IO, et al. Active albuterol or  
45  
46 placebo, sham acupuncture, or no intervention in asthma.  
47  
48 *N Engl J Med* 2011;365(2):119-26. doi:  
49  
50 10.1056/NEJMoa1103319 [published Online First:  
51  
52 2011/07/15]  
53  
54  
55  
56  
57  
58  
59  
60

1  
2  
3  
4  
5  
6  
7  
8  
9  
10  
11  
12  
13  
14  
15  
16  
17  
18  
19  
20  
21  
22  
23  
24  
25  
26  
27  
28  
29  
30  
31  
32  
33  
34  
35  
36  
37  
38  
39  
40  
41  
42  
43  
44  
45  
46  
47  
48  
49  
50  
51  
52  
53  
54  
55  
56  
57  
58  
59  
60

For peer review only

1  
2  
3 **Figure 1** Flow diagram for study participants.  
4

5 **Figure 2** Time to termination of oxygen therapy during 30 days after randomization.  
6  
7  
8  
9  
10  
11  
12  
13  
14  
15  
16  
17  
18  
19  
20  
21  
22  
23  
24  
25  
26  
27  
28  
29  
30  
31  
32  
33  
34  
35  
36  
37  
38  
39  
40  
41  
42  
43  
44  
45  
46  
47  
48  
49  
50  
51  
52  
53  
54  
55  
56  
57  
58  
59  
60

For peer review only

1 **Figure 1**  
2  
3  
4  
5  
6  
7  
8



9  
10  
11  
12  
13  
14  
15  
16  
17  
18  
19  
20  
21  
22  
23  
24  
25  
26  
27  
28  
29  
30  
31  
32  
33  
34  
35  
36  
37  
38  
39  
40  
41

**Figure 2** Time to termination of oxygen therapy.



| No at risk    |    |    |    |   |   |   |   |  |
|---------------|----|----|----|---|---|---|---|--|
| Standard care | 50 | 24 | 7  | 6 | 4 | 2 | 2 |  |
| Ciclesonide   | 48 | 31 | 11 | 5 | 2 | 1 | 1 |  |

ew only

**ONLINE APPENDIX**

Brodin D, Tornhammar P, Ueda P, Krifors A, Westerlund E, Athlin S, Wojt S, Elvstam O, Neumann A, Elshani A, Giesecke J, Edvardsson J, Bunpuckdee S, Unge C, Larsson M, Johansson B, Ljungberg J, Lindell J, Hansson J, Blennow O, Andersson DP. Inhaled Ciclesonide in Adults Hospitalized with Covid-19: a Randomized Controlled Open-label Trial (HALT Covid-19).

For peer review only



## Protocol changes and rationale

The trial was designed in the beginning of the covid-19 pandemic when data from randomized clinical trials of Covid-19 treatment were scarce. After trial initiation, treatments for patients with Covid-19 and hospitalization rates of such patients changed rapidly. Therefore, we made changes to the protocol and the trial was stopped early.

5 weeks after the start of patient inclusion in our study, in July 2020, the Recovery Collaborative group presented preliminary data<sup>1</sup> showing protective effects of dexamethasone treatment in patients hospitalized for covid-19; a subgroup analysis of this study indicated that the effect was driven by patients receiving invasive mechanical ventilation or oxygen therapy. These data, in combination with local experience from treating patients with Covid-19,<sup>2</sup> led to most patients receiving oxygen therapy with  $\geq 4$  L oxygen/min at the study hospitals being treated with systemic corticosteroids. As use of systemic corticosteroids was an exclusion criterion, the change in practice made a large proportion of the Covid-19 patients ineligible for participation.

Initially the trial was conducted at 4 hospitals. To increase the inclusion rate, 9 additional hospitals were included as study sites, although only 5 of them ended up recruiting patients to the study. We also removed the previous upper age limit of 85 years for inclusion and allowed for inclusion of patients based on a positive antigen test for SARS-CoV-2. Moreover, because some patients may start receiving oxygen therapy before hospital admission (e.g., at nursing homes before being transported

1  
2  
3 to the hospital) or a period after hospital admission (e.g., if the patient's condition  
4 deteriorated) and we aimed to include patients shortly after initiation of such therapy,  
5  
6 we changed the inclusion criteria from hospitalization within 48 hours prior to  
7  
8 enrollment to initiation of oxygen therapy no longer than 48 hours prior to enrollment.  
9  
10  
11  
12  
13

14 All changes were approved by the Data Monitoring Committee, Ethical Review  
15 Authority and the Swedish Medical Products Agency and implemented from  
16  
17 December 2020.  
18  
19  
20  
21  
22  
23

24 In June 2021, when 99 patients had been included in the study, a large and  
25 increasing proportion of the adult Swedish population had received vaccination for  
26  
27 Covid-19. The number of patients hospitalized with Covid-19 had dropped  
28  
29 substantially and there were none to only a few Covid-19 patients admitted to the  
30  
31 study hospitals per week. We determined that it was unlikely that we would reach the  
32  
33 intended sample size and asked the Data Monitoring Committee to convene for a  
34  
35 meeting. Following the recommendation of the Data Monitoring Committee, the study  
36  
37 was terminated early due to expected futility to meet total enrolment.  
38  
39  
40  
41  
42  
43  
44  
45  
46  
47  
48  
49  
50  
51  
52  
53  
54  
55  
56  
57  
58  
59  
60

### Inclusion and exclusion criteria<sup>a</sup>

Participants were eligible for inclusion if, at the time of study inclusion, they (1) were aged  $\geq 18$  years, (2) had a polymerase chain reaction confirmed SARS-CoV-2 infection or a positive antigen test for SARS-CoV-2, (3) were hospitalized at any of the study hospitals and (4) were receiving oxygen therapy with not more than 48 hours having passed since initiation of this treatment.

Patients were not eligible for inclusion if they (1) had a history of hypersensitivity to ciclesonide or other substances included in the treatment, (2) received ongoing treatment with inhaled or oral corticosteroids, ketokonazol, itrakonazol, ritonavir or nelfinavir, (3) received  $>8$  L oxygen/min or  $>50$  % oxygen with nasal high-flow therapy, (4) were receiving or under consideration for palliative care or had an expected survival of less than 72 h, (5) were expected to be admitted to an intensive care unit within 48 h, (6) had active or inactive pulmonary tuberculosis, severe liver failure (Child-Pugh C), pulmonary arterial hypertension or fibrosis, cognitive or physical impairment, (7) had insufficient language skills to understand information given about the study, (8) had been included in a clinical trial within 30 days, or (9) were women and pregnant, breastfeeding or did not agree to take highly effective contraceptive measures while receiving treatment plus an additional 7 days.

<sup>a</sup> The presentation of these inclusion and exclusion criteria have been modified for readability as compared with the version presented in the study protocol.

**Appendix table 1** Number of participants included in the final study population by study center.

| <i>Study center</i>                     | <i>n participants</i> |
|-----------------------------------------|-----------------------|
| Danderyd Hospital                       | 26                    |
| Capio S:t Göran Hospital                | 24                    |
| Karolinska University Hospital          | 21                    |
| Västmanland County Hospital             | 13                    |
| Örebro University Hospital <sup>a</sup> | 6                     |
| Växjö Central Hospital <sup>a</sup>     | 3                     |
| Halland County Hospital <sup>a</sup>    | 2                     |
| Östersund Hospital <sup>a</sup>         | 2                     |
| Visby Hospital <sup>a</sup>             | 1                     |

<sup>a</sup> In the analyses adjusted for study center, these hospitals were categorized into one group.

**Appendix table 2** Additionally adjusted model.

| <b>Variable</b>                                    | <b>Hazard ratio (95% CI)<br/>for termination of<br/>oxygen therapy</b> |
|----------------------------------------------------|------------------------------------------------------------------------|
| Ciclesonide (vs standard care)                     | 0.68 (0.43 to 1.09)                                                    |
| Age (per year increase)                            | 0.97 (0.95 to 0.99)                                                    |
| Female (vs male)                                   | 0.81 (0.46 to 1.40)                                                    |
| Days since symptom onset (per day increase)        | 0.99 (0.93 to 1.06)                                                    |
| C-reactive protein (per mg/L increase)             | 1.00 (1.00 to 1.00)                                                    |
| White cell count (per 10 <sup>9</sup> /L increase) | 1.07 (0.95 to 1.19)                                                    |
| Diabetes                                           | 0.84 (0.44 to 1.58)                                                    |
| Hypertension                                       | 1.42 (0.79 to 2.56)                                                    |
| Hyperlipidemia                                     | 0.86 (0.45 to 1.64)                                                    |

The model was also adjusted for study center.

## References

1. Group RC, Horby P, Lim WS, et al. Dexamethasone in Hospitalized Patients with Covid-19. *N Engl J Med* 2021;384(8):693-704. doi: 10.1056/NEJMoa2021436 [published Online First: 2020/07/18]
2. Kan B, Ahl M, Blennow O, et al. *Lakartidningen* 2020;117 [published Online First: 2020/10/07]

For peer review only

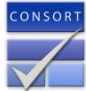

## CONSORT 2010 checklist of information to include when reporting a randomised trial\*

| Section/Topic                    | Item No | Checklist item                                                                                                                                                                              | Reported on page No |
|----------------------------------|---------|---------------------------------------------------------------------------------------------------------------------------------------------------------------------------------------------|---------------------|
| <b>Title and abstract</b>        |         |                                                                                                                                                                                             |                     |
|                                  | 1a      | Identification as a randomised trial in the title                                                                                                                                           | 1                   |
|                                  | 1b      | Structured summary of trial design, methods, results, and conclusions (for specific guidance see CONSORT for abstracts)                                                                     | 3                   |
| <b>Introduction</b>              |         |                                                                                                                                                                                             |                     |
| Background and objectives        | 2a      | Scientific background and explanation of rationale                                                                                                                                          | 5,6                 |
|                                  | 2b      | Specific objectives or hypotheses                                                                                                                                                           | 5-7                 |
| <b>Methods</b>                   |         |                                                                                                                                                                                             |                     |
| Trial design                     | 3a      | Description of trial design (such as parallel, factorial) including allocation ratio                                                                                                        | 6-9                 |
|                                  | 3b      | Important changes to methods after trial commencement (such as eligibility criteria), with reasons                                                                                          | 6,7,9               |
| Participants                     | 4a      | Eligibility criteria for participants                                                                                                                                                       | 7,8                 |
|                                  | 4b      | Settings and locations where the data were collected                                                                                                                                        | 6,7                 |
| Interventions                    | 5       | The interventions for each group with sufficient details to allow replication, including how and when they were actually administered                                                       | 6-11                |
| Outcomes                         | 6a      | Completely defined pre-specified primary and secondary outcome measures, including how and when they were assessed                                                                          | 9-11                |
|                                  | 6b      | Any changes to trial outcomes after the trial commenced, with reasons                                                                                                                       | 6,7                 |
| Sample size                      | 7a      | How sample size was determined                                                                                                                                                              | 6-9                 |
|                                  | 7b      | When applicable, explanation of any interim analyses and stopping guidelines                                                                                                                | 6,7                 |
| <b>Randomisation:</b>            |         |                                                                                                                                                                                             |                     |
| Sequence generation              | 8a      | Method used to generate the random allocation sequence                                                                                                                                      | 8                   |
|                                  | 8b      | Type of randomisation; details of any restriction (such as blocking and block size)                                                                                                         | 8                   |
| Allocation concealment mechanism | 9       | Mechanism used to implement the random allocation sequence (such as sequentially numbered containers), describing any steps taken to conceal the sequence until interventions were assigned | 8                   |
| Implementation                   | 10      | Who generated the random allocation sequence, who enrolled participants, and who assigned participants to interventions                                                                     | 8                   |
| Blinding                         | 11a     | If done, who was blinded after assignment to interventions (for example, participants, care providers, those                                                                                | 8,11                |

|    |                          |                                                                                                                     |       |
|----|--------------------------|---------------------------------------------------------------------------------------------------------------------|-------|
| 1  |                          | assessing outcomes) and how                                                                                         |       |
| 2  |                          | 11b If relevant, description of the similarity of interventions                                                     | -     |
| 3  | Statistical methods      | 12a Statistical methods used to compare groups for primary and secondary outcomes                                   | 10,11 |
| 4  |                          | 12b Methods for additional analyses, such as subgroup analyses and adjusted analyses                                | 10,11 |
| 5  |                          |                                                                                                                     |       |
| 6  | <b>Results</b>           |                                                                                                                     |       |
| 7  | Participant flow (a      | 13a For each group, the numbers of participants who were randomly assigned, received intended treatment, and        | 11-13 |
| 8  | diagram is strongly      | were analysed for the primary outcome                                                                               |       |
| 9  | recommended)             | 13b For each group, losses and exclusions after randomisation, together with reasons                                | 11-13 |
| 10 | Recruitment              | 14a Dates defining the periods of recruitment and follow-up                                                         | 6,7   |
| 11 |                          | 14b Why the trial ended or was stopped                                                                              | 7     |
| 12 | Baseline data            | 15 A table showing baseline demographic and clinical characteristics for each group                                 | Yes   |
| 13 | Numbers analysed         | 16 For each group, number of participants (denominator) included in each analysis and whether the analysis was      | Yes   |
| 14 |                          | by original assigned groups                                                                                         |       |
| 15 | Outcomes and             | 17a For each primary and secondary outcome, results for each group, and the estimated effect size and its           | Yes   |
| 16 | estimation               | precision (such as 95% confidence interval)                                                                         |       |
| 17 |                          | 17b For binary outcomes, presentation of both absolute and relative effect sizes is recommended                     | -     |
| 18 | Ancillary analyses       | 18 Results of any other analyses performed, including subgroup analyses and adjusted analyses, distinguishing       | 10,11 |
| 19 |                          | pre-specified from exploratory                                                                                      |       |
| 20 | Harms                    | 19 All important harms or unintended effects in each group (for specific guidance see CONSORT for harms)            | 13    |
| 21 |                          |                                                                                                                     |       |
| 22 | <b>Discussion</b>        |                                                                                                                     |       |
| 23 | Limitations              | 20 Trial limitations, addressing sources of potential bias, imprecision, and, if relevant, multiplicity of analyses | 13-17 |
| 24 | Generalisability         | 21 Generalisability (external validity, applicability) of the trial findings                                        | 13-17 |
| 25 | Interpretation           | 22 Interpretation consistent with results, balancing benefits and harms, and considering other relevant evidence    | 13-17 |
| 26 |                          |                                                                                                                     |       |
| 27 | <b>Other information</b> |                                                                                                                     |       |
| 28 | Registration             | 23 Registration number and name of trial registry                                                                   | 6     |
| 29 | Protocol                 | 24 Where the full trial protocol can be accessed, if available                                                      | -     |
| 30 | Funding                  | 25 Sources of funding and other support (such as supply of drugs), role of funders                                  | 18,19 |

36

37 \*We strongly recommend reading this statement in conjunction with the CONSORT 2010 Explanation and Elaboration for important clarifications on all the items. If relevant, we also

38 recommend reading CONSORT extensions for cluster randomised trials, non-inferiority and equivalence trials, non-pharmacological treatments, herbal interventions, and pragmatic trials.

39 Additional extensions are forthcoming: for those and for up to date references relevant to this checklist, see [www.consort-statement.org](http://www.consort-statement.org).

40

41

42
